# Supplementary material for: Development and characterization of stable anaerobic thermophilic methanogenic microbiomes fermenting switchgrass at decreasing residence times
Source: Biotechnol Biofuels. 2018 Sep 6;11:243. doi: 10.1186/s13068-018-1238-1 (PMC6126044; doi:10.1186/s13068-018-1238-1)
Supplement: Supplementary file 7 — Additional file 7: Table S4. Genetic markers of interest including carbohydrate-active enzymes (CAZymes), markers with KEGG orthology (KOs) for xylose metabolism, and protein families (pfams) markers for syntrophy and methanogenesis, which were derived from [72] and MetaCyc.org. [file 13068_2018_1238_MOESM7_ESM.xlsx]

## Sheet: Anaerobic Digestion Pathways
Methanogenesis from Acetate Methanosarcina acetivorans [1]
Gene ID	Gene Accession	Reaction id	Reaction EC	KEGG Orth.	InterPro	pfam	Enzymatic activity
GI2O-1006	MA1011	ACETYLSYNCLTH-RXN	2.3.1.169	KO:K00197	IPR007202	pfam03599	acetyl-CoA decarbonylase/synthase complex subunit gamma
GI2O-1006	MA1011	1.2.7.4-RXN	1.2.7.4	KO:K00197	IPR007202	pfam03599	acetyl-CoA decarbonylase/synthase complex subunit gamma
GI2O-1006	MA1011	RXN-12908	2.1.1.245	KO:K00197	IPR007202	pfam03599	acetyl-CoA decarbonylase/synthase complex subunit gamma
GI2O-1007	MA1012	ACETYLSYNCLTH-RXN	2.3.1.169	KO:K00194	IPR000489	pfam03599	acetyl-CoA decarbonylase/synthase complex subunit delta
GI2O-1007	MA1012	1.2.7.4-RXN	1.2.7.4	KO:K00194	IPR000489	pfam03599	acetyl-CoA decarbonylase/synthase complex subunit delta
GI2O-1007	MA1012	RXN-12908	2.1.1.245	KO:K00194	IPR000489	pfam03599	acetyl-CoA decarbonylase/synthase complex subunit delta
GI2O-1009	MA1014	ACETYLSYNCLTH-RXN	2.3.1.169	KO:K00193	IPR004461	pfam03598	acetyl-CoA decarbonylase/synthase complex subunit beta
GI2O-1009	MA1014	1.2.7.4-RXN	1.2.7.4	KO:K00193	IPR004461	pfam03598	acetyl-CoA decarbonylase/synthase complex subunit beta
GI2O-1009	MA1014	RXN-12908	2.1.1.245	KO:K00193	IPR004461	pfam03598	acetyl-CoA decarbonylase/synthase complex subunit beta
GI2O-1010	MA1015	ACETYLSYNCLTH-RXN	2.3.1.169	KO:K00195	IPR003704	pfam02552	acetyl-CoA decarbonylase/synthase complex subunit epsilon
GI2O-1010	MA1015	1.2.7.4-RXN	1.2.7.4	KO:K07491	IPR002686	pfam01797	acetyl-CoA decarbonylase/synthase complex subunit epsilon
GI2O-1010	MA1015	RXN-12908	2.1.1.245	KO:K00195	IPR003704	pfam02552	acetyl-CoA decarbonylase/synthase complex subunit epsilon
GI2O-1297	MA1309	1.2.7.4-RXN	1.2.7.4	KO:K00198	IPR004137	pfam03063	carbon-monoxide dehydrogenase, catalytic subunit
GI2O-3241	MA3282	1.2.7.4-RXN	1.2.7.4	KO:K00198	IPR004137	pfam03063	carbon-monoxide dehydrogenase, catalytic subunit
GI2O-3558	MA3606	ACETATEKIN-RXN	2.7.2.1	KO:K00925	IPR000890	pfam00871	acetate kinase
GI2O-3559	MA3607	PHOSACETYLTRANS-RXN	2.3.1.8	KO:K00625	IPR002505	pfam01515	phosphate acetyltransferase
GI2O-3811	MA3861	ACETYLSYNCLTH-RXN	2.3.1.169	KO:K00195	IPR003704	pfam02552	acetyl-CoA decarbonylase/synthase complex subunit epsilon
GI2O-3811	MA3861	1.2.7.4-RXN	1.2.7.4	KO:K00195	IPR003704	pfam02552	acetyl-CoA decarbonylase/synthase complex subunit epsilon
GI2O-3811	MA3861	RXN-12908	2.1.1.245	KO:K00195	IPR003704	pfam02552	acetyl-CoA decarbonylase/synthase complex subunit epsilon
GI2O-3812	MA3862	ACETYLSYNCLTH-RXN	2.3.1.169	KO:K00193	IPR004461	pfam03598	acetyl-CoA decarbonylase/synthase complex subunit beta
GI2O-3812	MA3862	1.2.7.4-RXN	1.2.7.4	KO:K00193	IPR004461	pfam03598	acetyl-CoA decarbonylase/synthase complex subunit beta
GI2O-3812	MA3862	RXN-12908	2.1.1.245	KO:K00193	IPR004461	pfam03598	acetyl-CoA decarbonylase/synthase complex subunit beta
GI2O-3814	MA3864	ACETYLSYNCLTH-RXN	2.3.1.169	KO:K00194	IPR000489	pfam03599	acetyl-CoA decarbonylase/synthase complex subunit delta
GI2O-3814	MA3864	1.2.7.4-RXN	1.2.7.4	KO:K00194	IPR000489	pfam03599	acetyl-CoA decarbonylase/synthase complex subunit delta
GI2O-3814	MA3864	RXN-12908	2.1.1.245	KO:K00194	IPR000489	pfam03599	acetyl-CoA decarbonylase/synthase complex subunit delta
GI2O-3815	MA3865	ACETYLSYNCLTH-RXN	2.3.1.169	KO:K00197	IPR007202	pfam03599	acetyl-CoA decarbonylase/synthase complex subunit gamma
GI2O-3815	MA3865	1.2.7.4-RXN	1.2.7.4	KO:K00197	IPR007202	pfam03599	acetyl-CoA decarbonylase/synthase complex subunit gamma
GI2O-3815	MA3865	RXN-12908	2.1.1.245	KO:K00197	IPR007202	pfam03599	acetyl-CoA decarbonylase/synthase complex subunit gamma
Methyl-coenzyme M reduction to methane [1]
Gene ID	Gene Accession	Reaction id	Reaction EC	KEGG Orth.	InterPro	pfam	Enzymatic activity
GI2O-4498	MA4546	METHYL-COM-HTP-RXN	2.8.4.1	KO:K00399	IPR003138	pfam02745	methyl coenzyme M reductase, subunit alpha
GI2O-4499	MA4547	METHYL-COM-HTP-RXN	2.8.4.1	KO:K00402	IPR003178	pfam02240	methyl coenzyme M reductase, subunit gamma
GI2O-4500	MA4548	METHYL-COM-HTP-RXN	2.8.4.1	KO:K03421	IPR007687	pfam04609	methyl coenzyme M reductase, subunit D
GI2O-4501	MA4549	METHYL-COM-HTP-RXN	2.8.4.1	KO:K03422	IPR003901	pfam02505	methyl coenzyme M reductase, subunit C
GI2O-4502	MA4550	METHYL-COM-HTP-RXN	2.8.4.1	KO:K00401	IPR003179	pfam02241	methyl coenzyme M reductase, subunit beta
Methanogenesis from H2 + CO2 Methanothermobacter thermautotrophicus Delta H [1]
Gene ID	Gene Accession	Reaction id	Reaction EC	KEGG Orth.	InterPro	pfam	Enzymatic activity
GJNM-918	MTH917	FORMYLMETHANOFURAN-DEHYDROGENASE-RXN	1.2.99.5	KO:K11261	IPR003814	pfam02663	molybdenum formylmethanofuran dehydrogenase subunit E
GJNM-919	MTH918	FORMYLMETHANOFURAN-DEHYDROGENASE-RXN	1.2.99.5	KO:K00202	IPR002489	pfam01493	molybdenum formylmethanofuran dehydrogenase subunit C
GJNM-920	MTH919	FORMYLMETHANOFURAN-DEHYDROGENASE-RXN	1.2.99.5	KO:K00201	IPR006656	pfam00384	molybdenum formylmethanofuran dehydrogenase subunit B
GJNM-403	MTH403	2.3.1.101-RXN	2.3.1.101	KO:K00672	IPR002770	pfam01913	formylmethanofuran--tetrahydromethanopterin formyltransferase
GJNM-1260	MTH1259	2.3.1.101-RXN	2.3.1.101	KO:K00672	IPR002770	pfam01913	formylmethanofuran--tetrahydromethanopterin formyltransferase
GJNM-774	MTH773	3.5.4.27-RXN	3.5.4.27	KO:K01499	IPR003209	pfam02289	N(5),N(10)-methenyltetrahydromethanopterin cyclohydrolase
GJNM-504	MTH504	H2-METHYLENE-THMPT-DEHYDRO-RXN	1.12.98.2	none	IPR004889	pfam03201	H(2)-dependent methylenetetrahydromethanopterin dehydrogenase-like protein
GJNM-1143	MTH1142	H2-METHYLENE-THMPT-DEHYDRO-RXN	1.12.98.2	KO:K13942	IPR004889	pfam03201	H(2)-dependent methylenetetrahydromethanopterin dehydrogenase
GJNM-1513	MTH1512	H2-METHYLENE-THMPT-DEHYDRO-RXN	1.12.98.2	none	IPR004889	pfam03201	H(2)-dependent methylenetetrahydromethanopterin dehydrogenase-like protein
GJNM-1063	MTH1062	2.1.1.86-RXN	2.1.1.86	KO:K00577	IPR005778	pfam04208	tetrahydromethanopterin S-methyltransferase subunit A
GJNM-1157	MTH1156	2.1.1.86-RXN	2.1.1.86	KO:K00584	IPR000489	pfam02007	tetrahydromethanopterin S-methyltransferase subunit H
GJNM-1158	MTH1157	2.1.1.86-RXN	2.1.1.86	KO:K00583	IPR005866	pfam04210	tetrahydromethanopterin S-methyltransferase subunit G
GJNM-1159	MTH1158	2.1.1.86-RXN	2.1.1.86	KO:K00582	IPR011307	pfam09472	tetrahydromethanopterin S-methyltransferase subunit F
GJNM-1160	MTH1159	2.1.1.86-RXN	2.1.1.86	KO:K00577	IPR005778	pfam09472	tetrahydromethanopterin S-methyltransferase subunit A
GJNM-1161	MTH1160	2.1.1.86-RXN	2.1.1.86	KO:K00578	IPR008690	pfam05440	tetrahydromethanopterin S-methyltransferase subunit B
GJNM-1162	MTH1161	2.1.1.86-RXN	2.1.1.86	KO:K00579	IPR005865	pfam04211	tetrahydromethanopterin S-methyltransferase subunit C
GJNM-1163	MTH1162	2.1.1.86-RXN	2.1.1.86	KO:K00580	IPR005779	pfam04207	tetrahydromethanopterin S-methyltransferase subunit D
GJNM-1164	MTH1163	2.1.1.86-RXN	2.1.1.86	KO:K00581	IPR005780	pfam04206	tetrahydromethanopterin S-methyltransferase subunit E
Methyl-coenzyme M reduction to methane [1]
Gene ID	Gene Accession	Reaction id	Reaction EC	KEGG Orth.	InterPro	pfam	Enzymatic activity
GJNM-1130	MTH1129	METHYL-COM-HTP-RXN	2.8.4.1	KO:K00399	IPR003183	pfam02249	methyl coenzyme M reductase II subunit alpha
GJNM-1131	MTH1130	METHYL-COM-HTP-RXN	2.8.4.1	KO:K00402	IPR003178	pfam02240	methyl coenzyme M reductase II subunit gamma
GJNM-1132	MTH1131	METHYL-COM-HTP-RXN	2.8.4.1	KO:K03422	IPR003901	pfam02505	methyl coenzyme M reductase II, D protein
GJNM-1133	MTH1132	METHYL-COM-HTP-RXN	2.8.4.1	KO:K00401	IPR003179	pfam02241	methyl coenzyme M reductase II subunit beta
GJNM-1165	MTH1164	METHYL-COM-HTP-RXN	2.8.4.1	KO:K00399	IPR003183	pfam02745	methyl coenzyme M reductase I subunit alpha
GJNM-1166	MTH1165	METHYL-COM-HTP-RXN	2.8.4.1	KO:K00402	IPR003178	pfam02240	methyl coenzyme M reductase I subunit gamma
GJNM-1167	MTH1166	METHYL-COM-HTP-RXN	2.8.4.1	KO:K03421	IPR007687		methyl coenzyme M reductase I, C protein
GJNM-1168	MTH1167	METHYL-COM-HTP-RXN	2.8.4.1	KO:K03422	IPR003901	pfam02505	methyl coenzyme M reductase I, D protein
GJNM-1169	MTH1168	METHYL-COM-HTP-RXN	2.8.4.1	KO:K00401	IPR003179	pfam02241	methyl coenzyme M reductase I subunit beta
Reductive acetyl coenzyme-A pathway Clostridium ljungdahlii DSM 13528 [1]
Gene ID	Gene Accession	Reaction id	Reaction EC	KEGG Orth.	InterPro	pfam	Enzymatic activity
GHMO-696	CLJU_c06990	FORMATE-DEHYDROGENASE-NADP+-RXN	1.2.1.43	KO:K00123	IPR006478	pfam04879	formate dehydrogenase subunit alpha
GHMO-699	CLJU_c07020	FORMATE-DEHYDROGENASE-NADP+-RXN	1.2.1.43	KO:K02379	IPR003786	pfam02634	formate dehydrogenase subunit FdhD
GHMO-3752	CLJU_c37650	FORMATETHFLIG-RXN	6.3.4.3	KO:K01938	IPR000559	pfam01268	formate-tetrahydrofolate ligase (formyltetrahydrofolate synthetase)
GHMO-3750	CLJU_c37630	METHENYLTHFCYCLOHYDRO-RXN	3.5.4.9	KO:K01491	IPR000672	pfam00763	bifunctional methylenetetrahydrofolate dehydrogenase/methenyltetrahydrofolate cyclohydrolase
GHMO-3751	CLJU_c37640	METHENYLTHFCYCLOHYDRO-RXN	3.5.4.9	none	IPR007044	pfam04961	formyltetrahydrofolate cyclohydrolase
GHMO-3750	CLJU_c37630	METHYLENETHFDEHYDROG-NADP-RXN	1.5.1.5	KO:K01491	IPR000672	pfam00763	bifunctional methylenetetrahydrofolate dehydrogenase/methenyltetrahydrofolate cyclohydrolase
GHMO-3743	CLJU_c37560	METHCOCLTH-RXN	2.1.1.258	KO:K15023	IPR000489	pfam00809	methyltetrahydrofolate:corrinoid/iron-sulfur protein methyltransferase
GHMO-3742	CLJU_c37550	ACETYLSYNCLTH-RXN	2.3.1.169	KO:K14138	IPR004461	pfam03598	CO dehydrogenase/acetyl-CoA synthase complex subunit beta
GHMO-3744	CLJU_c37570	ACETYLSYNCLTH-RXN	2.3.1.169	KO:K00197	IPR007202	pfam04060	CO dehydrogenase/acetyl-CoA synthase subunit gamma
GHMO-3745	CLJU_c37580	ACETYLSYNCLTH-RXN	2.3.1.169	KO:K00194	IPR016041	pfam03599	CO dehydrogenase/acetyl-CoA synthase subunit delta
GHMO-3754	CLJU_c37670	ACETYLSYNCLTH-RXN	2.3.1.169	KO:K00198	IPR004137	pfam03063	carbon monoxide dehydrogenase
Formate oxidation to CO2 Syntrophomonas wolfei wolfei Goettingen G311 [1,2]
Gene ID	Gene Accession	Reaction id	Reaction EC	KEGG Orth.	InterPro	pfam	Enzymatic activity
GHL1-769	Swol_0786	1.2.1.2-RXN	1.2.1.2	KO:K05299	IPR006656	pfam00384	formate dehydrogenase subunit alpha
GHL1-780	Swol_0797	1.2.1.2-RXN	1.2.1.2	KO:K00127	IPR016174	pfam01292	formate dehydrogenase subunit gamma
GHL1-781	Swol_0798	1.2.1.2-RXN	1.2.1.2	KO:K00124	IPR014603	pfam13247	formate dehydrogenase iron-sulfur subunit
GHL1-1821	Swol_1826	1.2.1.2-RXN	1.2.1.2	KO:K00123	IPR006311	pfam04879	formate dehydrogenase subunit alpha
GHL1-782	Swol_0799	1.2.1.2-RXN	1.2.1.2	KO:K00123	IPR006443	pfam00384	formate dehydrogenase
GHL1-1820	Swol_1825	1.2.1.2-RXN	1.2.1.2	KO:K00123	IPR006656	pfam01568	formate dehydrogenase
GHL1-779	Swol_0796			KO:K02380	IPR024064	pfam04216	FdHE-like protein, putative formate dehydrogenase formation protein
Syntrophic butyrate oxidation S. wolfei wolfei Goettingen G311 [1,2]
Gene ID	Gene Accession	Reaction id	Reaction EC	KEGG Orth.	InterPro	pfam	Enzymatic activity
butyryl-CoA: acetate CoA-transferase	Swol_1932				IPR003702	pfam02550
						pfam13336
butyryl-CoA dehydrogenase	Swol_1933		1.3.99.3	KO:K00257	IPR006090	pfam00441	Acyl-CoA dehydrogenase
					IPR006091	pfam02770
					IPR006092	pfam02771
					IPR02878	pfam12806
	Swol_2052		1.3.99.3	KO:K00257	IPR006090	pfam00441	Acyl-CoA dehydrogenase
					IPR006091	pfam02770
					IPR025878	pfam12806
EtfA	Swol_0697			KO:K03522	IPR014731	pfam00766	Electron transfer flavoprotein, alpha subunit
					IPR014730	pfam01012
EtfB	Swol_0696			KO:K03521	IPR014730	pfam01012	Electron transfer flavoprotein, beta subunit
DUF224	Swol_0698				IPR003816	pfam02665	putative iron-sulfur-binding reductase
					IPR004017	pfam02754
						pfam13183
Formate DH (extracellular)	Swol_0797		1.2.1.2	KO:K00127	IPR016174	pfam01292	formate dehydrogenase gamma subunit
	Swol_0798	1.2.1.2-RXN	1.2.1.2	KO:K00124	IPR014603	pfam13247	formate dehydrogenase iron-sulfur subunit
	Swol_0799	1.2.1.2-RXN	1.2.1.2	KO:K00123	IPR006656	pfam00384	formate dehydrogenase alpha subunit
					IPR006657	pfam01568
	Swol_0800				IPR006963	pfam04879	formate dehydrogenase-O, major subunit, selenocysteine-containing
Fe-Fe hydrogenase	Swol_1017		1.6.5.3	KO:K00336	IPR013352	pfam13510	iron hydrogenase, small subunit
					IPR019574	pfam10588
					IPR004108	pfam02906
						pfam02256
						pfam13187
	Swol_1018		1.6.5.3	KO:K00335	IPR011538	pfam01512	Fe-hydrogenase, beta subunit
					IPR019575	pfam10589
	Swol_1019		1.6.5.3	KO:K00334	IPR002023	pfam01257	Fe-hydrogenase, gamma subunit
Formate DH (cytoplasmic)	Swol_0783		1.6.5.3	KO:K00334	IPR012336	pfam01257	NADH dehydrogenase I chain E
	Swol_0784		1.6.5.3	KO:K00335	IPR011538	pfam01512	NADH dehydrogenase subunit F
					IPR019554	pfam10531
					IPR019575	pfam10589
	Swol_0785		1.2.1.43	KO:K05299	IPR006656	pfam00384	NADH dehydrogenase I chain G
					IPR006963	pfam04879
						pfam10588
						pfam13510
						pfam14697
	Swol_0786		1.2.1.43	KO:K05299	IPR006656	pfam00384	formate dehydrogenase alpha subunit
					IPR006656	pfam01568
Syntrophic propionate utilization (methylmalonyl-CoA pathway) Syntrophobacter fumaroxidans MPOB [1,2]
Gene ID	Gene Accession	Reaction id	Reaction EC	KEGG Orth.	InterPro	pfam	Enzymatic activity
methylmalonyl-CoA epimerase	Sfum_0455		5.1.99.1	KO:K05606	IPR017515	pfam13669	R-Methylmalonyl-CoA <-> S-methylmalonyl-CoA
methylmalonyl-CoA mutase, large subunit	Sfum_0458		5.4.99.2	KO:K01848	IPR006099	pfam01642	methylmalonyl-CoA mutase
Periplasmic Formate DH	Sfum_1273		1.2.1.2	KO:K00123	IPR006311	pfam04879	formate dehydrogenase subunit alpha
	Sfum_1274		1.2.1.2	KO:K00123	IPR006443	pfam00384
Xylose catabolism [1]
Gene ID	Gene Accession	Reaction id	Reaction EC	KEGG Orth.	InterPro	pfam	Enzymatic activity
GLMA-278	Tsac_0277	XYLISOM-RXN	5.3.1.5	KO:K01805	IPR012307	pfam01261	Xylose isomerase
GLMA-277	Tsac_0276	XYLULOKIN-RXN	2.7.1.17	KO:K00854	IPR00600	pfam00370	xylulokinase
						pfam02782
[1] Caspi R, Billington R, Ferrer L, Foerster H, Fulcher CA, Keseler IM, Kothari A, Krummenacker M, Latendresse M, Mueller LA, Ong Q, Paley S, Subhraveti P, Weaver DS, Karp PD. 2008. The MetaCyc database of metabolic pathways and enzymes and the BioCyc collection of pathway/genome databases. Nucleic Acids Res 36:D623–D631.
[2] Worm P, Koehorst JJ, Visser M, Sedano-Núñez VT, Schaap PJ, Plugge CM, Sousa DZ, Stams AJM. 2014. A genomic view on syntrophic versus non-syntrophic lifestyle in anaerobic fatty acid degrading communities. Biochim Biophys Acta - Bioenerg 1837:2004–2016.

## Sheet: SpeciesKOsandPfams
Species#	Taxon	KO:K01805	KO:K00854	pfam03599	pfam03598	pfam02552	pfam03063	pfam00871	pfam01515	pfam02249	pfam02240	pfam02505	pfam02241	pfam02745	pfam04609	pfam02663	pfam01493	pfam00384	pfam01913	pfam02289	pfam03201	pfam04208	pfam02007	pfam04210	pfam09472	pfam05440	pfam04211	pfam04207	pfam04206	pfam02249	pfam02240	pfam02505	pfam02241	pfam02745	pfam04609	pfam04879	pfam02634	pfam01268	pfam00763	pfam04961	pfam00809	pfam03598	pfam04060	pfam03599	pfam03063	pfam00384	pfam01292	pfam13247	pfam01568
1	g__Clostridium_3	1	1	0	0	0	1	1	1	0	0	0	0	0	0	0	1	0	0	0	0	0	0	0	0	0	0	0	0	0	0	0	0	0	0	0	0	1	1	0	1	0	1	0	1	0	0	1	0
2	g__Clostridium_3	1	1	0	0	0	1	1	1	0	0	0	0	0	0	0	1	0	0	0	0	0	0	0	0	0	0	0	0	0	0	0	0	0	0	0	0	1	1	0	1	0	1	0	1	0	0	1	0
3	o__Clostridiales	0	1	0	0	0	1	1	1	0	0	0	0	0	0	0	0	1	0	0	0	0	0	0	0	0	0	0	0	0	0	0	0	0	0	1	1	1	1	1	0	0	1	0	1	1	0	1	1
4	s__Clostridium_clariflavum	1	1	0	0	0	1	1	1	0	0	0	0	0	0	0	1	0	0	0	0	0	0	0	0	0	0	0	0	0	0	0	0	0	0	0	0	1	1	0	1	0	1	0	1	0	0	0	0
5	o__Clostridiales	0	1	0	0	0	1	1	0	0	0	0	0	0	0	0	1	0	0	0	0	0	0	0	0	0	0	0	0	0	0	0	0	0	0	0	0	1	1	0	1	0	1	0	1	0	0	0	0
6	p__Firmicutes	0	1	1	0	0	1	1	1	0	0	0	0	0	0	0	1	0	0	0	0	0	0	0	0	0	0	0	0	0	0	0	0	0	0	0	0	1	1	0	1	0	1	1	1	0	0	0	0
7	o__Clostridiales	0	0	0	0	0	1	1	0	0	0	0	0	0	0	0	1	0	0	0	0	0	0	0	0	0	0	0	0	0	0	0	0	0	0	0	0	1	1	0	1	0	1	0	1	0	0	1	0
8	o__Clostridiales	0	0	1	1	0	1	1	1	0	0	0	0	0	0	1	1	1	0	1	0	0	0	0	0	0	0	0	0	0	0	0	0	0	0	1	0	1	1	1	1	1	1	1	1	1	0	1	1
9	o__Clostridiales	1	1	0	0	0	1	1	1	0	0	0	0	0	0	0	0	0	0	0	0	0	0	0	0	0	0	0	0	0	0	0	0	0	0	0	0	1	1	0	1	0	1	0	1	0	0	0	0
10	g__Clostridium_3	1	1	0	0	0	0	1	1	0	0	0	0	0	0	0	1	0	0	0	0	0	0	0	0	0	0	0	0	0	0	0	0	0	0	0	0	1	1	0	1	0	1	0	0	0	0	1	0
11	o__Clostridiales	1	1	0	0	0	1	1	0	0	0	0	0	0	0	0	1	0	0	0	0	0	0	0	0	0	0	0	0	0	0	0	0	0	0	0	0	1	1	1	1	0	1	0	1	0	0	1	0
12	g__Methanothermobacter	0	0	1	1	1	1	0	0	1	1	1	1	1	1	1	1	1	1	1	1	1	1	1	1	1	1	1	1	1	1	1	1	1	1	1	1	0	0	0	1	1	1	1	1	1	0	1	1
13	o__Clostridiales	0	0	1	1	0	1	1	1	0	0	0	0	0	0	0	1	1	0	0	0	0	0	0	0	0	0	0	0	0	0	0	0	0	0	1	0	1	1	1	1	1	1	1	1	1	0	1	0
14	o__Clostridiales	1	1	0	0	0	1	1	1	0	0	0	0	0	0	0	1	0	0	0	0	0	0	0	0	0	0	0	0	0	0	0	0	0	0	0	0	1	1	0	1	0	1	0	1	0	0	1	0
15	p__Firmicutes	1	1	0	0	0	0	1	0	0	0	0	0	0	0	0	1	1	0	0	0	0	0	0	0	0	0	0	0	0	0	0	0	0	0	1	0	1	1	0	0	0	1	0	0	1	0	0	0
16	o__Clostridiales	1	1	0	0	0	0	1	1	0	0	0	0	0	0	0	1	0	0	0	0	0	0	0	0	0	0	0	0	0	0	0	0	0	0	0	0	1	1	0	1	0	1	0	0	0	0	1	0
17	c__Mollicutes	1	1	0	0	0	0	1	1	0	0	0	0	0	0	0	0	0	0	0	0	0	0	0	0	0	0	0	0	0	0	0	0	0	0	0	0	1	1	1	0	0	1	0	0	0	0	0	0
18	f__Ruminococcaceae	1	1	0	0	0	1	1	0	0	0	0	0	0	0	0	1	0	0	0	0	0	0	0	0	0	0	0	0	0	0	0	0	0	0	0	0	1	1	0	1	0	1	0	1	0	0	1	0
19	f__Methanosarcinaceae	0	0	1	1	1	1	1	1	1	1	1	1	1	1	1	1	1	1	1	0	1	1	1	1	1	1	1	1	1	1	1	1	1	1	0	1	0	1	0	1	1	1	1	1	1	1	1	1
20	o__Thermoanaerobacterales	0	1	0	0	0	1	1	1	0	0	0	0	0	0	0	1	0	0	0	0	0	0	0	0	0	0	0	0	0	0	0	0	0	0	0	0	1	1	0	1	0	1	0	1	0	0	1	0
21	k__Bacteria	0	0	0	0	0	0	1	1	0	0	0	0	0	0	0	0	1	0	0	0	0	0	0	0	0	0	0	0	0	0	0	0	0	0	0	0	1	0	1	1	0	1	0	0	1	0	0	1
22	c__Bacilli	0	0	0	0	0	0	1	1	0	0	0	0	0	0	0	0	0	0	0	0	0	0	0	0	0	0	0	0	0	0	0	0	0	0	0	0	1	1	1	0	0	1	0	0	0	0	0	0
23	o__Thermoanaerobacterales	1	1	0	0	0	1	1	1	0	0	0	0	0	0	0	1	0	0	0	0	0	0	0	0	0	0	0	0	0	0	0	0	0	0	0	0	1	1	0	1	0	1	0	1	0	0	1	0
24	f__Syntrophomonadaceae	0	0	1	0	0	1	1	1	0	0	0	0	0	0	1	1	1	0	0	0	0	0	0	0	0	0	0	0	0	0	0	0	0	0	1	1	1	1	0	1	0	0	1	1	1	1	1	1
25	o__Clostridiales	0	1	0	0	0	1	1	0	0	0	0	0	0	0	0	1	0	0	0	0	0	0	0	0	0	0	0	0	0	0	0	0	0	0	0	0	1	1	0	0	0	1	0	1	0	0	1	0
26	f__Synergistaceae	0	1	0	0	0	1	1	1	0	0	0	0	0	0	0	1	1	1	1	0	0	0	0	0	0	0	0	0	0	0	0	0	0	0	1	1	1	0	1	1	0	1	0	1	1	0	1	1
27	o__Acidobacteriales	0	1	0	0	0	0	1	1	0	0	0	0	0	0	1	1	1	0	0	0	0	0	0	0	0	0	0	0	0	0	0	0	0	0	1	0	0	1	1	1	0	0	0	0	1	1	1	1
28	g__Clostridium_3	1	1	1	1	0	1	1	1	0	0	0	0	0	0	0	1	0	0	0	0	0	0	0	0	0	0	0	0	0	0	0	0	0	0	0	0	1	1	1	1	1	1	1	1	0	0	1	0
29	g__Clostridium_3	0	1	1	0	0	1	1	1	0	0	0	0	0	0	0	1	0	0	0	0	0	0	0	0	0	0	0	0	0	0	0	0	0	0	0	0	1	1	0	1	0	1	1	1	0	0	0	0
30	s__Clostridium_thermocellum	0	0	0	0	0	1	1	1	0	0	0	0	0	0	0	1	0	0	0	0	0	0	0	0	0	0	0	0	0	0	0	0	0	0	0	0	1	1	0	1	0	1	0	1	0	0	1	0
31	g__Methanobacterium	0	0	1	1	1	1	0	0	1	1	1	1	1	1	1	1	1	1	1	0	1	1	1	1	1	1	1	1	1	1	1	1	1	1	1	1	0	0	0	1	1	1	1	1	1	0	1	1
32	g__Clostridium_3	0	0	1	0	0	1	1	1	0	0	0	0	0	0	0	1	0	0	0	0	0	0	0	0	0	0	0	0	0	0	0	0	0	0	0	0	1	1	0	1	0	1	1	1	0	0	1	0
33	f__Rhodocyclaceae	0	0	0	0	0	0	1	1	0	0	0	0	0	0	0	1	1	0	0	0	0	0	0	0	0	0	0	0	0	0	0	0	0	0	1	1	0	1	0	1	0	1	0	0	1	1	1	1
34	p__Chloroflexi	1	1	0	0	0	0	1	1	0	0	0	0	0	0	1	1	1	0	0	0	0	0	0	0	0	0	0	0	0	0	0	0	0	0	1	1	1	1	1	1	0	0	0	0	1	1	1	1
35	g__Thermodesulfovibrio	0	0	1	1	0	1	0	0	0	0	0	0	0	0	1	1	1	0	0	0	0	0	0	0	0	0	0	0	0	0	0	0	0	0	1	1	1	1	0	1	1	1	1	1	1	1	1	1
36	k__Bacteria	1	1	0	0	0	1	1	1	0	0	0	0	0	0	0	1	0	0	0	0	0	0	0	0	0	0	0	0	0	0	0	0	0	0	0	0	1	1	0	1	0	1	0	1	0	0	1	0
37	p__Firmicutes	1	1	0	0	0	0	1	0	0	0	0	0	0	0	0	1	1	0	0	0	0	0	0	0	0	0	0	0	0	0	0	0	0	0	1	0	1	1	0	0	0	1	0	0	1	0	0	0
38	p__Chloroflexi	1	1	0	0	0	0	0	0	0	0	0	0	0	0	0	1	1	0	0	0	0	0	0	0	0	0	0	0	0	0	0	0	0	0	1	0	1	1	1	1	0	0	0	0	1	0	1	1
39	f__Ruminococcaceae	0	1	0	0	0	1	1	1	0	0	0	0	0	0	1	1	0	0	0	0	0	0	0	0	0	0	0	0	0	0	0	0	0	0	0	0	1	1	1	1	0	1	0	1	0	0	0	0
40	p__Firmicutes	0	1	0	0	0	0	1	1	0	0	0	0	0	0	0	0	0	0	0	0	0	0	0	0	0	0	0	0	0	0	0	0	0	0	0	0	1	1	1	1	0	1	0	0	0	0	1	0
41	p__Chloroflexi	1	1	0	0	0	0	0	0	0	0	0	0	0	0	1	1	1	0	0	0	0	0	0	0	0	0	0	0	0	0	0	0	0	0	1	1	1	0	1	1	0	0	0	0	1	0	1	1
42	o__Clostridiales	1	1	1	1	0	1	1	1	0	0	0	0	0	0	0	1	0	0	0	0	0	0	0	0	0	0	0	0	0	0	0	0	0	0	0	0	1	1	1	1	1	1	1	1	0	0	1	0
43	o__Clostridiales	1	1	0	0	0	1	1	1	0	0	0	0	0	0	0	0	0	0	0	0	0	0	0	0	0	0	0	0	0	0	0	0	0	0	0	0	1	1	0	1	0	1	0	1	0	0	0	0
44	g__Clostridium_3	1	1	0	0	0	1	1	1	0	0	0	0	0	0	0	1	0	0	0	0	0	0	0	0	0	0	0	0	0	0	0	0	0	0	0	0	1	1	1	1	0	1	0	1	0	0	1	0
45	o__Clostridiales_3	0	0	0	0	0	1	1	1	0	0	0	0	0	0	0	0	0	0	0	0	0	0	0	0	0	0	0	0	0	0	0	0	0	0	0	0	1	1	1	0	0	1	0	1	0	0	0	0
46	f__Thermotogaceae	1	1	0	0	0	0	1	1	0	0	0	0	0	0	0	0	0	0	0	0	0	0	0	0	0	0	0	0	0	0	0	0	0	0	0	0	1	1	1	1	0	1	0	0	0	0	0	0
47	c__Mollicutes	0	0	0	0	0	0	1	1	0	0	0	0	0	0	0	0	0	0	0	0	0	0	0	0	0	0	0	0	0	0	0	0	0	0	0	0	1	1	0	0	0	1	0	0	0	0	0	0
48	p__Firmicutes	1	1	0	0	0	1	1	0	0	0	0	0	0	0	0	1	0	0	0	0	0	0	0	0	0	0	0	0	0	0	0	0	0	0	0	0	1	1	0	1	0	1	0	1	0	0	0	0
			Xylose catabolism
			Methanogenesis from Acetate Methanosarcina acetivorans
			Methanogenesis from H2 + CO2 Methanothermobacter thermautotrophicus Delta H
			Reductive acetyl coenzyme-A pathway Clostridium ljungdahlii DSM 13528
			Syntrophic butyrate oxidation S. wolfei wolfei Goettingen G311
			Syntrophic propionate utilization (methylmalonyl-CoA pathway) Syntrophobacter fumaroxidans MPOB
[truncated: 36 more columns]
