# Supplementary material for: Development and characterization of stable anaerobic thermophilic methanogenic microbiomes fermenting switchgrass at decreasing residence times
Source: Biotechnol Biofuels. 2018 Sep 6;11:243. doi: 10.1186/s13068-018-1238-1 (PMC6126044; doi:10.1186/s13068-018-1238-1)
Supplement: Supplementary file 12 — Additional file 12: Table S6. Addition statistics for the metagenome assemblies and bins. [file 13068_2018_1238_MOESM12_ESM.xlsx]

## Sheet: Assembly_Stats
Sample #								1							2							3							4							5							6
Corresponding 16S rRNA Sample #								4							5							6							13							19							20
Retention Time								20							20							20							20							20							20
Sample Day								6							6							6							68							110							110
Reactor								1							2							3							1							1							2
IMG #	TOTAL							94453							94451							94454							94452							94458							94449
		Assembled		Unassembled		Total			Assembled		Unassembled		Total			Assembled		Unassembled		Total		Assembled		Unassembled		Total			Assembled		Unassembled		Total			Assembled		Unassembled		Total				Assembled		Unassembled		Total
		Number	% of Assembled	Number	% of Unassembled	Number	% of Total		Number	% of Assembled	Number	% of Unassembled	Number	% of Total		Number	% of Assembled	Number	% of Unassembled	Number	% of Total		Number	% of Assembled	Number	% of Unassembled	Number	% of Total		Number	% of Assembled	Number	% of Unassembled	Number	% of Total		Number	% of Assembled	Number	% of Unassembled	Number	% of Total		Number	% of Assembled	Number	% of Unassembled	Number	% of Total
	Number of sequences	3399776	0.370778	5769527	0.629222	9169303	1	Number of sequences	254369	0.4392	324844	0.5608	579213	1	Number of sequences	272829	0.4266	366747	0.5734	639576	1	Number of sequences	274518	0.4468	339942	0.5532	614460	1	Number of sequences	215154	0.3847	344185	0.6153	559339	1	Number of sequences	274962	0.4428	345961	0.5572	620923	1	Number of sequences	236332	0.3919	366665	0.6081	602997	1
	Number of bases	3860114879	0.739238	1361635471	0.260762	5221750350	1	Number of bases	251543013	0.7675	76180584	0.2325	327723597	1	Number of bases	273937062	0.76	86493823	0.24	360430885	1	Number of bases	288715018	0.7832	79935283	0.2168	368650301	1	Number of bases	269790837	0.7716	79874846	0.2284	349665683	1	Number of bases	323556227	0.7984	81699130	0.2016	405255357	1	Number of bases	236514132	0.7346	85460962	0.2654	321975094	1
	GC count	1745183597	0.452107	597310776	0.438672	2342494373	0.448603	GC count	107194572	0.4261	32688184	0.4291	139882756	0.4268	GC count	115245395	0.4207	37570176	0.4344	152815571	0.424	GC count	121884579	0.4222	34646803	0.4334	156531382	0.4246	GC count	124557603	0.4617	36495021	0.4569	161052624	0.4606	GC count	152529668	0.4714	36408341	0.4456	188938009	0.4662	GC count	107953688	0.4564	39109190	0.4576	147062878	0.4568
	CRISPR Count	17608	-	31482	0.00570967	49090	0.00417938	CRISPR Count	1372	-	3122	0.0099	4494	0.006	CRISPR Count	1338	-	2892	0.0081	4230	0.0051	CRISPR Count	1430	-	2987	0.0091	4417	0.0054	CRISPR Count	1223	-	2172	0.0066	3395	0.0045	CRISPR Count	1506	-	2168	0.0066	3674	0.0044	CRISPR Count	1041	-	1808	0.0051	2849	0.0038
	Genes							Genes							Genes							Genes							Genes							Genes							Genes
	RNA genes	88160	0.0141465	12286	0.00222822	100446	0.00855169	RNA genes	5747	0.0132	680	0.0022	6427	0.0086	RNA genes	6668	0.0142	838	0.0024	7506	0.0091	RNA genes	7006	0.0144	920	0.0028	7926	0.0097	RNA genes	6038	0.0145	914	0.0028	6952	0.0093	RNA genes	7314	0.0143	866	0.0026	8180	0.0097	RNA genes	5502	0.0137	905	0.0025	6407	0.0084
	rRNA genes	24566	0.00394195	1721	0.000312126	26287	0.002238	rRNA genes	1690	0.0039	82	0.0003	1772	0.0024	rRNA genes	2204	0.0047	115	0.0003	2319	0.0028	rRNA genes	2301	0.0047	98	0.0003	2399	0.0029	rRNA genes	1616	0.0039	116	0.0004	1732	0.0023	rRNA genes	2058	0.004	135	0.0004	2193	0.0026	rRNA genes	1692	0.0042	132	0.0004	1824	0.0024
	5S rRNA	4533	0.000727381	370	6.71043e-05	4903	0.000417427	5S rRNA	307	0.0007	20	0.0001	327	0.0004	5S rRNA	334	0.0007	28	0.0001	362	0.0004	5S rRNA	359	0.0007	28	0.0001	387	0.0005	5S rRNA	313	0.0007	21	0.0001	334	0.0004	5S rRNA	363	0.0007	26	0.0001	389	0.0005	5S rRNA	270	0.0007	29	0.0001	299	0.0004
	16S rRNA	8391	0.00134645	491	8.90492e-05	8882	0.000756188	16S rRNA	558	0.0013	22	0.0001	580	0.0008	16S rRNA	785	0.0017	36	0.0001	821	0.001	16S rRNA	826	0.0017	36	0.0001	862	0.0011	16S rRNA	575	0.0014	35	0.0001	610	0.0008	16S rRNA	690	0.0013	43	0.0001	733	0.0009	16S rRNA	579	0.0014	44	0.0001	623	0.0008
	18S rRNA	28	4.49298e-06	9	1.63227e-06	37	3.15007e-06	18S rRNA	2	0	2	0	4	0	18S rRNA	2	0	0	0	2	0	18S rRNA	2	0	1	0	3	0	18S rRNA	3	0	0	0	3	0	18S rRNA	4	0	0	0	4	0	18S rRNA	1	0	0	0	1	0
	23S rRNA	11540	0.00185175	814	0.000147629	12354	0.00105178	23S rRNA	818	0.0019	32	0.0001	850	0.0011	23S rRNA	1081	0.0023	50	0.0001	1131	0.0014	23S rRNA	1109	0.0023	33	0.0001	1142	0.0014	23S rRNA	717	0.0017	59	0.0002	776	0.001	23S rRNA	993	0.0019	64	0.0002	1057	0.0013	23S rRNA	839	0.0021	58	0.0002	897	0.0012
	28S rRNA	74	1.18743e-05	37	6.71043e-06	111	9.45022e-06	28S rRNA	5	0	6	0	11	0	28S rRNA	2	0	1	0	3	0	28S rRNA	5	0	0	0	5	0	28S rRNA	8	0	1	0	9	0	28S rRNA	8	0	2	0	10	0	28S rRNA	3	0	1	0	4	0
	tRNA genes	63594	0.0102045	10565	0.0019161	74159	0.00631369	tRNA genes	4057	0.0093	598	0.0019	4655	0.0062	tRNA genes	4464	0.0095	723	0.002	5187	0.0063	tRNA genes	4705	0.0097	822	0.0025	5527	0.0068	tRNA genes	4422	0.0106	798	0.0024	5220	0.007	tRNA genes	5256	0.0103	731	0.0022	5987	0.0071	tRNA genes	3810	0.0095	773	0.0022	4583	0.006
	Protein coding genes	6143787	0.985854	5501520	0.997772	11645307	0.991448	Protein coding genes	428191	0.9868	314151	0.9978	742342	0.9914	Protein coding genes	463310	0.9858	355643	0.9976	818953	0.9909	Protein coding genes	477907	0.9856	327778	0.9972	805685	0.9903	Protein coding genes	411369	0.9855	328545	0.9972	739914	0.9907	Protein coding genes	503960	0.9857	329195	0.9974	833155	0.9903	Protein coding genes	397291	0.9863	355103	0.9975	752394	0.9916
	with Product Name	6231947	1	5513806	1	11745753	1	with Product Name	433938	1	314831	1	748769	1	with Product Name	469978	1	356481	1	826459	1	with Product Name	484913	1	328698	1	813611	1	with Product Name	417407	1	329459	1	746866	1	with Product Name	511274	1	330061	1	841335	1	with Product Name	402793	1	356008	1	758801	1
	with COG	3741050	0.600302	2322276	0.421175	6063326	0.516214	with COG	253653	0.5845	125216	0.3977	378869	0.506	with COG	271264	0.5772	154610	0.4337	425874	0.5153	with COG	282994	0.5836	156600	0.4764	439594	0.5403	with COG	251326	0.6021	156206	0.4741	407532	0.5457	with COG	309099	0.6046	153712	0.4657	462811	0.5501	with COG	240938	0.5982	162252	0.4558	403190	0.5314
	with Pfam	3704162	0.594383	2046422	0.371145	5750584	0.489588	with Pfam	250531	0.5773	130213	0.4136	380744	0.5085	with Pfam	269507	0.5734	146775	0.4117	416282	0.5037	with Pfam	281184	0.5799	129099	0.3928	410283	0.5043	with Pfam	251162	0.6017	127541	0.3871	378703	0.5071	with Pfam	305616	0.5978	128272	0.3886	433888	0.5157	with Pfam	233357	0.5793	136043	0.3821	369400	0.4868
	with KO	2896845	0.464838	1979720	0.359048	4876565	0.415177	with KO	198711	0.4579	110937	0.3524	309648	0.4135	with KO	211606	0.4502	143713	0.4031	355319	0.4299	with KO	219588	0.4528	144048	0.4382	363636	0.4469	with KO	190902	0.4574	139375	0.423	330277	0.4422	with KO	238456	0.4664	135497	0.4105	373953	0.4445	with KO	192423	0.4777	134203	0.377	326626	0.4305
	with Enzyme	1564861	0.251103	1097795	0.199099	2662656	0.226691	with Enzyme	106486	0.2454	61910	0.1966	168396	0.2249	with Enzyme	113010	0.2405	81189	0.2278	194199	0.235	with Enzyme	117113	0.2415	82958	0.2524	200071	0.2459	with Enzyme	102961	0.2467	81186	0.2464	184147	0.2466	with Enzyme	129903	0.2541	79095	0.2396	208998	0.2484	with Enzyme	106092	0.2634	78660	0.221	184752	0.2435
	with MetaCyc	933453	0.149785	663016	0.120247	1596469	0.135919	with MetaCyc	62457	0.1439	36745	0.1167	99202	0.1325	with MetaCyc	65774	0.14	48183	0.1352	113957	0.1379	with MetaCyc	68099	0.1404	49418	0.1503	117517	0.1444	with MetaCyc	61470	0.1473	49534	0.1503	111004	0.1486	with MetaCyc	78194	0.1529	48146	0.1459	126340	0.1502	with MetaCyc	64061	0.159	47924	0.1346	111985	0.1476
	with KEGG	1638822	0.262971	1123950	0.203843	2762772	0.235215	with KEGG	111180	0.2562	63360	0.2013	174540	0.2331	with KEGG	117473	0.25	83067	0.233	200540	0.2426	with KEGG	122076	0.2517	85088	0.2589	207164	0.2546	with KEGG	107572	0.2577	83058	0.2521	190630	0.2552	with KEGG	135483	0.265	81104	0.2457	216587	0.2574	with KEGG	109862	0.2728	80797	0.227	190659	0.2513
	COG Clusters	57228	-	49876	-	59200	-	COG Clusters	3730	0.8054	3194	0.6897	3836	0.8283	COG Clusters	3681	0.7949	3364	0.7264	3851	0.8316	COG Clusters	3652	0.7886	3364	0.7264	3829	0.8268	COG Clusters	3894	0.8409	3298	0.7122	3992	0.862	COG Clusters	3953	0.8536	3272	0.7065	4038	0.8719	COG Clusters	3793	0.819	3555	0.7677	4031	0.8704
	Pfam Clusters	75589	-	60751	-	80480	-	Pfam Clusters	4858	0.2979	3820	0.2343	5107	0.3132	Pfam Clusters	4810	0.295	4103	0.2516	5154	0.3161	Pfam Clusters	4794	0.294	4123	0.2529	5153	0.316	Pfam Clusters	5204	0.3191	4056	0.2487	5487	0.3365	Pfam Clusters	5347	0.3279	4007	0.2457	5598	0.3433	Pfam Clusters	4991	0.3061	4349	0.2667	5466	0.3352
[truncated: 63 more columns]

## Sheet: Bin_Stats
Bin id	Residence Time (Days)	Day	Reactor (1 is Control)	Abundance	Relative abundance	Genome size	GC content	Marker lineage	# genomes	# markers	# marker sets	# unique markers	# multi-copy	0	1	2	3	4	5+	Completeness2	Contamination	Strain heterogeneity	Taxonomy	Taxonomy_TaxonLevel		Stats
94446.MaxBin.out.001	3.3	201	2	961.58	0.207534	465164	47.9	k__Bacteria (UID203)	5449	103	57	1	0	98	5	0	0	0	0	8.77	0	0	k__Bacteria;p__Firmicutes;c__Clostridia;o__Clostridiales;f__Peptostreptococcaceae_3;g__Clostridium_3	g__Clostridium_3		# of bins with > 20% contamination	118
94446.MaxBin.out.002	3.3	201	2	651.28	0.140563	1602250	47.5	o__Clostridiales (UID1120)	304	250	143	10	1	110	138	2	0	0	0	63.05	1.05	0	k__Bacteria;p__Firmicutes;c__Clostridia;o__Clostridiales;f__Peptostreptococcaceae_3;g__Clostridium_3	g__Clostridium_3		% of bins with > 20% contamination	0.152455
94446.MaxBin.out.003	3.3	201	2	524.25	0.113147	1576241	30.4	k__Bacteria (UID209)	5443	103	58	35	0	21	81	1	0	0	0	74.34	1.72	0	k__Bacteria;p__Thermotogae;c__Thermotogae;o__Thermotogales;f__Thermotogaceae	f__Thermotogaceae		# of bins with < 40% completeness	77
94446.MaxBin.out.004	3.3	201	2	522.45	0.112758	4082169	35.8	o__Clostridiales (UID1212)	172	262	148	43	0	17	243	2	0	0	0	93.92	1.01	50	k__Bacteria;p__Firmicutes;c__Clostridia;o__Clostridiales;f__Peptostreptococcaceae_3;g__Clostridium_3;s__Clostridium_clariflavum	s__Clostridium_clariflavum		% of bins with < 40% completeness	0.0994832
94446.MaxBin.out.005	3.3	201	2	320.99	0.069278	410451	34.2	root (UID1)	5656	56	24	0	0	56	0	0	0	0	0	0	0	0	NA	NA		# of bins with > 95% completeness	275
94446.MaxBin.out.006	3.3	201	2	240.52	0.0519105	2244621	45.9	k__Bacteria (UID203)	5449	102	56	20	22	0	53	48	1	0	0	100	39.29	0	k__Bacteria	k__Bacteria		% of bins with > 95% completeness	0.355297
94446.MaxBin.out.007	3.3	201	2	204.36	0.0441062	372657	39.8	root (UID1)	5656	56	24	0	0	56	0	0	0	0	0	0	0	0	NA	NA		total bins	774
94446.MaxBin.out.008	3.3	201	2	188.33	0.0406465	1911479	45.6	o__Clostridiales (UID1212)	172	263	149	42	0	9	252	2	0	0	0	95.53	0.3	50	k__Bacteria;p__Firmicutes;c__Clostridia;o__Clostridiales	o__Clostridiales		total metagenomes	15
94446.MaxBin.out.009	3.3	201	2	168.29	0.0363214	2418919	52.1	o__Clostridiales (UID1120)	304	250	143	41	0	27	210	13	0	0	0	88.46	3.63	0	k__Bacteria;p__Firmicutes;c__Clostridia;o__Clostridiales;f__Peptostreptococcaceae_3;g__Clostridium_3	g__Clostridium_3		avg bins per metagenome	51.6
94446.MaxBin.out.010	3.3	201	2	108.74	0.0234689	662937	34.8	root (UID1)	5656	56	24	0	0	56	0	0	0	0	0	0	0	0	NA	NA
94446.MaxBin.out.011	3.3	201	2	77.59	0.0167459	4231966	49.9	k__Bacteria (UID203)	5449	103	57	30	13	1	68	34	0	0	0	98.25	39.01	8.82	k__Bacteria;p__Firmicutes;c__Clostridia;o__Clostridiales;f__Peptostreptococcaceae_3;g__Clostridium_3	g__Clostridium_3
94446.MaxBin.out.012	3.3	201	2	74.72	0.0161265	1470944	50.9	k__Bacteria (UID2328)	3167	126	75	41	2	1	121	4	0	0	0	98.67	2.24	75	k__Bacteria;p__Tenericutes;c__Mollicutes	c__Mollicutes
94446.MaxBin.out.013	3.3	201	2	51.36	0.0110848	2374258	40.9	c__Clostridia (UID1118)	387	223	124	43	0	3	217	3	0	0	0	97.98	1.21	0	k__Bacteria;p__Firmicutes;c__Clostridia;o__Thermoanaerobacterales	o__Thermoanaerobacterales
94446.MaxBin.out.014	3.3	201	2	40.06	0.00864599	1354401	50.2	p__Euryarchaeota (UID3)	148	188	125	33	3	40	133	11	4	0	0	76.8	9.23	60.87	k__Archaea;p__Euryarchaeota;c__Methanobacteria;o__Methanobacteriales;f__Methanobacteriaceae;g__Methanothermobacter	g__Methanothermobacter
94446.MaxBin.out.015	3.3	201	2	35.78	0.00772226	2257857	36.6	o__Clostridiales (UID1120)	304	250	143	43	0	3	244	3	0	0	0	97.9	0.79	0	k__Bacteria;p__Firmicutes;c__Clostridia;o__Clostridiales	o__Clostridiales
94446.MaxBin.out.016	3.3	201	2	28.87	0.0062309	3152947	42.4	k__Bacteria (UID203)	5449	103	57	12	31	1	51	51	0	0	0	98.25	24.56	11.76	k__Bacteria;p__Firmicutes;c__Clostridia;o__Clostridiales;f__Peptostreptococcaceae_3;g__Clostridium_3	g__Clostridium_3
94446.MaxBin.out.017	3.3	201	2	28.84	0.00622442	2708181	41.8	o__Clostridiales (UID1212)	172	263	149	40	0	25	237	1	0	0	0	90.72	0.22	100	k__Bacteria;p__Firmicutes;c__Clostridia;o__Clostridiales	o__Clostridiales
94446.MaxBin.out.018	3.3	201	2	27.36	0.005905	1987798	50.2	o__Clostridiales (UID1212)	172	263	149	42	0	10	253	0	0	0	0	95.08	0	0	k__Bacteria;p__Firmicutes;c__Clostridia;o__Clostridiales	o__Clostridiales
94446.MaxBin.out.019	3.3	201	2	26.94	0.00581436	3087042	41.3	p__Euryarchaeota (UID49)	95	228	153	43	0	1	226	1	0	0	0	99.84	0.65	0	k__Archaea;p__Euryarchaeota;c__Methanomicrobia;o__Methanosarcinales;f__Methanosarcinaceae	f__Methanosarcinaceae
94446.MaxBin.out.020	3.3	201	2	26.92	0.00581004	3150013	62.3	p__Firmicutes (UID239)	1324	176	102	43	0	14	157	5	0	0	0	87.25	3.92	0	k__Bacteria;p__Firmicutes	p__Firmicutes
94446.MaxBin.out.021	3.3	201	2	24.95	0.00538486	2239217	41.3	k__Bacteria (UID203)	5449	103	57	9	1	66	37	0	0	0	0	52.63	0	0	k__Bacteria;p__Firmicutes;c__Clostridia;o__Clostridiales;f__Peptostreptococcaceae_3;g__Clostridium_3	g__Clostridium_3
94446.MaxBin.out.022	3.3	201	2	24.53	0.00529421	2674459	48.9	p__Firmicutes (UID241)	930	213	118	43	0	4	206	3	0	0	0	96.61	1.69	0	k__Bacteria;p__Firmicutes	p__Firmicutes
94446.MaxBin.out.023	3.3	201	2	23.42	0.00505465	2897989	52.6	o__Clostridiales (UID1120)	304	250	143	42	1	3	241	6	0	0	0	97.9	2.8	0	k__Bacteria;p__Firmicutes;c__Clostridia;o__Clostridiales;f__Peptostreptococcaceae_3;g__Clostridium_3	g__Clostridium_3
94446.MaxBin.out.024	3.3	201	2	20.55	0.00443523	3600580	44.3	o__Clostridiales (UID1212)	172	263	149	41	2	4	249	9	1	0	0	97.32	5.7	0	k__Bacteria;p__Firmicutes;c__Clostridia;o__Clostridiales;f__Peptostreptococcaceae_3;g__Clostridium_3	g__Clostridium_3
94446.MaxBin.out.025	3.3	201	2	20	0.00431652	2086321	54.1	o__Clostridiales (UID1212)	172	263	149	42	1	9	252	2	0	0	0	95.86	1.01	100	k__Bacteria;p__Firmicutes;c__Clostridia;o__Clostridiales	o__Clostridiales
94446.MaxBin.out.026	3.3	201	2	17.85	0.0038525	1971920	40	p__Euryarchaeota (UID3)	148	188	125	43	0	2	186	0	0	0	0	98.93	0	0	k__Archaea;p__Euryarchaeota;c__Methanobacteria;o__Methanobacteriales;f__Methanobacteriaceae;g__Methanobacterium	g__Methanobacterium
94446.MaxBin.out.027	3.3	201	2	16.49	0.00355897	2101065	41.1	o__Clostridiales (UID1212)	172	263	149	42	0	2	258	3	0	0	0	98.66	1.01	0	k__Bacteria;p__Firmicutes;c__Clostridia;o__Clostridiales	o__Clostridiales
94446.MaxBin.out.028	3.3	201	2	15.86	0.003423	3978150	32.5	o__Clostridiales (UID1212)	172	263	149	43	0	6	226	28	1	1	1	95.97	14.56	0	k__Bacteria;p__Firmicutes;c__Clostridia;o__Clostridiales	o__Clostridiales
94446.MaxBin.out.029	3.3	201	2	14.02	0.00302588	2272297	39.9	k__Bacteria (UID209)	5443	105	59	41	2	1	102	2	0	0	0	98.31	1.85	100	k__Bacteria	k__Bacteria
94446.MaxBin.out.030	3.3	201	2	11.38	0.0024561	5022414	63.1	k__Bacteria (UID3187)	2258	184	114	39	4	2	164	17	1	0	0	98.25	13.51	0	k__Bacteria;p__Acidobacteria;c__Acidobacteriia;o__Acidobacteriales	o__Acidobacteriales
94446.MaxBin.out.031	3.3	201	2	10.83	0.0023374	2117972	60.7	o__Clostridiales (UID1212)	172	263	149	43	0	6	252	5	0	0	0	96.98	3.02	40	k__Bacteria;p__Firmicutes;c__Clostridia;o__Clostridiales	o__Clostridiales
94446.MaxBin.out.032	3.3	201	2	10.61	0.00228991	2000915	33.5	k__Bacteria (UID203)	5449	103	57	6	1	61	26	16	0	0	0	67.54	27.19	0	k__Bacteria;p__Nitrospirae;c__Nitrospira;o__Nitrospirales;f__Nitrospiraceae;g__Thermodesulfovibrio	g__Thermodesulfovibrio
94446.MaxBin.out.033	3.3	201	2	10.52	0.00227049	3493683	36.1	o__Clostridiales (UID1212)	172	263	149	22	2	48	173	41	1	0	0	91.15	21.44	2.27	k__Bacteria;p__Firmicutes;c__Clostridia;o__Clostridiales;f__Peptostreptococcaceae_3;g__Clostridium_3	g__Clostridium_3
94446.MaxBin.out.034	3.3	201	2	10.3	0.00222301	2348839	44.9	o__Clostridiales (UID1212)	172	263	149	38	1	16	239	8	0	0	0	93.9	5.37	0	k__Bacteria;p__Firmicutes;c__Clostridia;o__Clostridiales	o__Clostridiales
94446.MaxBin.out.035	3.3	201	2	10.08	0.00217553	1991263	36	k__Bacteria (UID203)	5449	103	57	20	19	24	50	22	7	0	0	61.4	9.89	2.33	k__Bacteria;p__Firmicutes;c__Clostridia;o__Clostridiales	o__Clostridiales
94446.MaxBin.out.036	3.3	201	2	9.89	0.00213452	1314470	36.1	k__Bacteria (UID3187)	2258	180	109	36	1	70	99	11	0	0	0	48.88	7.8	0	k__Bacteria;p__Nitrospirae;c__Nitrospira;o__Nitrospirales;f__Nitrospiraceae;g__Thermodesulfovibrio	g__Thermodesulfovibrio
94446.MaxBin.out.037	3.3	201	2	9.35	0.00201797	3739675	41.8	k__Bacteria (UID203)	5449	104	58	25	13	18	58	21	6	1	0	72.41	25.24	22.22	k__Bacteria;p__Firmicutes;c__Clostridia	c__Clostridia
94446.MaxBin.out.038	3.3	201	2	8.4	0.00181294	2186699	43.1	p__Firmicutes (UID241)	930	213	118	37	3	21	185	7	0	0	0	90.88	3.12	0	k__Bacteria;p__Firmicutes	p__Firmicutes
94446.MaxBin.out.039	3.3	201	2	7.57	0.0016338	1831612	55.7	k__Bacteria (UID203)	5449	104	58	15	15	36	43	21	4	0	0	57.99	15.36	3.03	k__Bacteria;p__Firmicutes;c__Clostridia	c__Clostridia
94446.MaxBin.out.040	3.3	201	2	7.29	0.00157337	2589463	38.5	p__Firmicutes (UID240)	1318	179	104	15	0	51	100	20	7	1	0	81.79	23	0	k__Bacteria;p__Firmicutes;c__Clostridia	c__Clostridia
94446.MaxBin.out.041	3.3	201	2	7.14	0.001541	1799357	53.9	o__Clostridiales (UID1212)	172	263	149	37	0	48	212	3	0	0	0	81.17	2.01	0	k__Bacteria;p__Firmicutes;c__Clostridia;o__Clostridiales	o__Clostridiales
94446.MaxBin.out.042	3.3	201	2	6.78	0.0014633	1741515	46.4	k__Bacteria (UID203)	5449	104	58	23	11	25	59	20	0	0	0	68.89	22.18	10	k__Bacteria;p__Firmicutes;c__Clostridia;o__Clostridiales;f__Ruminococcaceae	f__Ruminococcaceae
94446.MaxBin.out.043	3.3	201	2	6.75	0.00145683	1609198	48.2	c__Clostridia (UID1118)	387	223	124	29	1	70	143	10	0	0	0	71.73	5.29	0	k__Bacteria;p__Firmicutes;c__Clostridia;o__Thermoanaerobacterales	o__Thermoanaerobacterales
94446.MaxBin.out.044	3.3	201	2	6.67	0.00143956	1907576	48.3	c__Clostridia (UID1085)	35	420	196	33	0	91	325	4	0	0	0	78.85	0.78	0	k__Bacteria;p__Firmicutes;c__Clostridia;o__Clostridiales_4;f__Syntrophomonadaceae	f__Syntrophomonadaceae
94446.MaxBin.out.045	3.3	201	2	6.46	0.00139424	1477089	54.9	o__Clostridiales (UID1212)	172	263	149	27	0	96	164	3	0	0	0	64.33	0.38	0	k__Bacteria;p__Firmicutes;c__Clostridia;o__Clostridiales;f__Ruminococcaceae	f__Ruminococcaceae
94446.MaxBin.out.046	3.3	201	2	6.44	0.00138992	1172652	47.9	k__Bacteria (UID203)	5449	104	58	12	14	40	43	21	0	0	0	61.78	9.25	0	k__Bacteria;p__Firmicutes;c__Clostridia;o__Clostridiales;f__Ruminococcaceae	f__Ruminococcaceae
94447.MaxBin.out.001	3.3	201	3	534.83	0.1261	1886406	46.9	o__Clostridiales (UID1120)	304	250	143	20	1	109	118	21	1	1	0	57.18	11.19	0	k__Bacteria;p__Firmicutes;c__Clostridia;o__Clostridiales;f__Peptostreptococcaceae_3;g__Clostridium_3	g__Clostridium_3
94447.MaxBin.out.002	3.3	201	3	472.45	0.111392	2563370	51	k__Bacteria (UID203)	5449	103	57	23	11	22	50	28	3	0	0	82.62	32.3	16.22	k__Bacteria;p__Firmicutes;c__Clostridia;o__Clostridiales;f__Peptostreptococcaceae_3;g__Clostridium_3	g__Clostridium_3
94447.MaxBin.out.003	3.3	201	3	382.76	0.0902453	2098932	34	o__Clostridiales (UID1212)	172	262	148	23	0	139	123	0	0	0	0	46.4	0	0	k__Bacteria;p__Firmicutes;c__Clostridia;o__Clostridiales;f__Peptostreptococcaceae_3;g__Clostridium_3;s__Clostridium_clariflavum	s__Clostridium_clariflavum
94447.MaxBin.out.004	3.3	201	3	369.69	0.0871637	2385160	37	o__Clostridiales (UID1212)	172	262	148	20	0	123	138	1	0	0	0	53.6	0.68	0	k__Bacteria;p__Firmicutes;c__Clostridia;o__Clostridiales;f__Peptostreptococcaceae_3;g__Clostridium_3;s__Clostridium_clariflavum	s__Clostridium_clariflavum
94447.MaxBin.out.005	3.3	201	3	320.68	0.0756084	2452535	33.8	o__Clostridiales (UID1212)	172	263	149	43	0	5	255	3	0	0	0	96.64	1.23	0	k__Bacteria;p__Firmicutes;c__Clostridia;o__Clostridiales	o__Clostridiales
94447.MaxBin.out.006	3.3	201	3	243.97	0.0575221	2562314	51.8	o__Clostridiales (UID1120)	304	250	143	40	3	12	210	27	1	0	0	94.41	9.8	20	k__Bacteria;p__Firmicutes;c__Clostridia;o__Clostridiales;f__Peptostreptococcaceae_3;g__Clostridium_3	g__Clostridium_3
94447.MaxBin.out.007	3.3	201	3	199.98	0.0471503	1870563	45.1	o__Clostridiales (UID1212)	172	263	149	39	0	24	237	2	0	0	0	90.02	0.36	50	k__Bacteria;p__Firmicutes;c__Clostridia;o__Clostridiales	o__Clostridiales
94447.MaxBin.out.008	3.3	201	3	166.79	0.0393249	1029111	47.2	k__Bacteria (UID209)	5443	105	59	23	0	54	46	5	0	0	0	42.06	8.47	0	k__Bacteria;p__Synergistetes;c__Synergistia;o__Synergistales;f__Synergistaceae	f__Synergistaceae
94447.MaxBin.out.009	3.3	201	3	165.39	0.0389948	1442694	30.8	k__Bacteria (UID209)	5443	103	58	36	0	16	86	1	0	0	0	85.08	1.72	0	k__Bacteria;p__Thermotogae;c__Thermotogae;o__Thermotogales;f__Thermotogaceae	f__Thermotogaceae
94447.MaxBin.out.010	3.3	201	3	148.21	0.0349442	1469084	44.5	k__Bacteria (UID203)	5449	102	56	42	0	0	102	0	0	0	0	100	0	0	k__Bacteria	k__Bacteria
94447.MaxBin.out.011	3.3	201	3	116.74	0.0275244	3522053	50.5	k__Bacteria (UID203)	5449	103	57	31	11	2	77	24	0	0	0	97.37	27.59	8.33	k__Bacteria;p__Firmicutes;c__Clostridia;o__Clostridiales;f__Peptostreptococcaceae_3;g__Clostridium_3	g__Clostridium_3
94447.MaxBin.out.012	3.3	201	3	90.49	0.0213353	2222347	33.2	c__Bacilli (UID285)	586	325	181	43	0	39	273	13	0	0	0	85.29	4.97	15.38	k__Bacteria;p__Firmicutes;c__Bacilli	c__Bacilli
94447.MaxBin.out.013	3.3	201	3	74.71	0.0176148	2647639	44.8	o__Clostridiales (UID1212)	172	263	149	43	0	6	256	1	0	0	0	97.26	0.67	0	k__Bacteria;p__Firmicutes;c__Clostridia;o__Clostridiales	o__Clostridiales
94447.MaxBin.out.014	3.3	201	3	74.4	0.0175417	1695488	49.5	p__Euryarchaeota (UID3)	148	188	125	41	2	0	185	3	0	0	0	100	0.18	0	k__Archaea;p__Euryarchaeota;c__Methanobacteria;o__Methanobacteriales;f__Methanobacteriaceae;g__Methanothermobacter	g__Methanothermobacter
94447.MaxBin.out.015	3.3	201	3	69.93	0.0164878	2185118	40.9	c__Clostridia (UID1118)	387	223	124	43	0	3	219	1	0	0	0	97.98	0.4	0	k__Bacteria;p__Firmicutes;c__Clostridia;o__Thermoanaerobacterales	o__Thermoanaerobacterales
94447.MaxBin.out.016	3.3	201	3	68.9	0.0162449	4285015	37.9	o__Clostridiales (UID1212)	172	263	149	43	0	1	252	10	0	0	0	99.33	2.91	0	k__Bacteria;p__Firmicutes;c__Clostridia;o__Clostridiales;f__Peptostreptococcaceae_3;g__Clostridium_3	g__Clostridium_3
94447.MaxBin.out.017	3.3	201	3	52.99	0.0124937	2725171	41.8	o__Clostridiales (UID1212)	172	263	149	42	0	27	236	0	0	0	0	88.37	0	0	k__Bacteria;p__Firmicutes;c__Clostridia;o__Clostridiales	o__Clostridiales
94447.MaxBin.out.018	3.3	201	3	43.71	0.0103057	2190059	43.1	p__Firmicutes (UID241)	930	213	118	43	0	10	200	3	0	0	0	96.61	2.12	0	k__Bacteria;p__Firmicutes	p__Firmicutes
94447.MaxBin.out.019	3.3	201	3	43.59	0.0102774	2971773	42.9	o__Clostridiales (UID1120)	304	250	143	42	1	7	238	5	0	0	0	96.5	2.45	20	k__Bacteria;p__Firmicutes;c__Clostridia;o__Clostridiales;f__Peptostreptococcaceae_3;g__Clostridium_3	g__Clostridium_3
94447.MaxBin.out.020	3.3	201	3	36.06	0.00850205	2798420	52.6	o__Clostridiales (UID1120)	304	250	143	42	1	3	237	10	0	0	0	97.9	5.24	0	k__Bacteria;p__Firmicutes;c__Clostridia;o__Clostridiales;f__Peptostreptococcaceae_3;g__Clostridium_3	g__Clostridium_3
94447.MaxBin.out.021	3.3	201	3	34.64	0.00816725	1538653	29.1	k__Bacteria (UID203)	5449	103	57	1	0	86	17	0	0	0	0	25.26	0	0	k__Bacteria;p__Tenericutes;c__Mollicutes;o__Erysipelotrichales;f__Erysipelotrichaceae	f__Erysipelotrichaceae
94447.MaxBin.out.022	3.3	201	3	32.71	0.0077122	2183258	36.5	o__Clostridiales (UID1120)	304	250	143	43	0	6	241	3	0	0	0	95.8	1.12	33.33	k__Bacteria;p__Firmicutes;c__Clostridia;o__Clostridiales	o__Clostridiales
94447.MaxBin.out.023	3.3	201	3	30.46	0.00718171	1645728	50.4	k__Bacteria (UID2328)	3167	126	75	43	0	2	124	0	0	0	0	97.33	0	0	k__Bacteria;p__Tenericutes;c__Mollicutes	c__Mollicutes
94447.MaxBin.out.024	3.3	201	3	30.4	0.00716756	2461013	49.2	p__Firmicutes (UID241)	930	213	118	42	1	4	205	4	0	0	0	96.61	1.77	25	k__Bacteria;p__Firmicutes	p__Firmicutes
94447.MaxBin.out.025	3.3	201	3	29.65	0.00699073	2155062	47.7	c__Clostridia (UID1118)	387	223	124	43	0	11	210	2	0	0	0	93.72	1.61	0	k__Bacteria;p__Firmicutes;c__Clostridia;o__Thermoanaerobacterales	o__Thermoanaerobacterales
94447.MaxBin.out.026	3.3	201	3	29.55	0.00696715	2009399	50.1	o__Clostridiales (UID1212)	172	263	149	42	0	9	253	1	0	0	0	95.41	0.67	100	k__Bacteria;p__Firmicutes;c__Clostridia;o__Clostridiales	o__Clostridiales
94447.MaxBin.out.027	3.3	201	3	22.79	0.00537331	166807	39.6	root (UID1)	5656	56	24	0	0	56	0	0	0	0	0	0	0	0	NA	NA
94447.MaxBin.out.028	3.3	201	3	21.54	0.0050786	162472	44.5	k__Bacteria (UID203)	5449	103	57	2	0	101	2	0	0	0	0	1.75	0	0	k__Bacteria;p__Firmicutes;c__Clostridia;o__Clostridiales;f__Peptostreptococcaceae_3;g__Clostridium_3	g__Clostridium_3
94447.MaxBin.out.029	3.3	201	3	19.52	0.00460233	2502089	52.2	p__Firmicutes (UID239)	1324	176	102	43	0	5	170	1	0	0	0	95.1	0.98	0	k__Bacteria;p__Firmicutes	p__Firmicutes
94447.MaxBin.out.030	3.3	201	3	18.53	0.00436891	3074554	41.4	p__Euryarchaeota (UID49)	95	228	153	43	0	1	226	1	0	0	0	99.84	0.65	0	k__Archaea;p__Euryarchaeota;c__Methanomicrobia;o__Methanosarcinales;f__Methanosarcinaceae	f__Methanosarcinaceae
94447.MaxBin.out.031	3.3	201	3	18.24	0.00430054	2842990	37.2	o__Clostridiales (UID1120)	304	250	143	10	0	68	182	0	0	0	0	87.41	0	0	k__Bacteria;p__Firmicutes;c__Clostridia;o__Clostridiales	o__Clostridiales
94447.MaxBin.out.032	3.3	201	3	17.49	0.00412371	2605429	37.3	o__Clostridiales (UID1212)	172	263	149	40	0	44	219	0	0	0	0	80.54	0	0	k__Bacteria;p__Firmicutes;c__Clostridia;o__Clostridiales	o__Clostridiales
94447.MaxBin.out.033	3.3	201	3	17.33	0.00408598	2019985	47.6	o__Clostridiales (UID1212)	172	263	149	43	0	7	254	2	0	0	0	95.75	1.01	0	k__Bacteria;p__Firmicutes;c__Clostridia;o__Clostridiales;f__Ruminococcaceae	f__Ruminococcaceae
94447.MaxBin.out.034	3.3	201	3	17.28	0.00407419	2031244	41.2	o__Clostridiales (UID1212)	172	263	149	42	0	2	260	1	0	0	0	98.66	0.34	0	k__Bacteria;p__Firmicutes;c__Clostridia;o__Clostridiales	o__Clostridiales
94447.MaxBin.out.035	3.3	201	3	16.4	0.00386671	3138965	62.4	p__Firmicutes (UID239)	1324	176	102	36	7	14	151	11	0	0	0	87.25	1.28	0	k__Bacteria;p__Firmicutes	p__Firmicutes
94447.MaxBin.out.036	3.3	201	3	15.57	0.00367102	3392314	44.4	k__Bacteria (UID203)	5449	103	57	26	17	5	79	12	7	0	0	92.98	4.15	6.06	k__Bacteria;p__Firmicutes;c__Clostridia;o__Clostridiales;f__Peptostreptococcaceae_3;g__Clostridium_3	g__Clostridium_3
94447.MaxBin.out.037	3.3	201	3	15	0.00353663	1808676	34.2	k__Bacteria (UID3187)	2258	180	109	42	0	2	175	3	0	0	0	99.03	2.29	0	k__Bacteria;p__Nitrospirae;c__Nitrospira;o__Nitrospirales;f__Nitrospiraceae;g__Thermodesulfovibrio	g__Thermodesulfovibrio
94447.MaxBin.out.038	3.3	201	3	14.97	0.00352955	1977015	35.9	o__Clostridiales (UID1212)	172	263	149	37	0	94	165	4	0	0	0	58.05	1.25	0	k__Bacteria;p__Firmicutes;c__Clostridia;o__Clostridiales	o__Clostridiales
94447.MaxBin.out.039	3.3	201	3	14.72	0.00347061	2323832	54.9	o__Clostridiales (UID1212)	172	263	149	41	0	8	245	8	2	0	0	96.09	6.42	21.43	k__Bacteria;p__Firmicutes;c__Clostridia;o__Clostridiales;f__Ruminococcaceae	f__Ruminococcaceae
94447.MaxBin.out.040	3.3	201	3	13.48	0.00317825	2360686	54.3	k__Bacteria (UID203)	5449	104	58	26	13	5	71	26	2	0	0	97.65	30.56	0	k__Bacteria;p__Firmicutes;c__Clostridia;o__Clostridiales	o__Clostridiales
94447.MaxBin.out.041	3.3	201	3	12.65	0.00298256	2440703	33.1	k__Bacteria (UID2328)	3167	126	75	16	4	58	47	17	3	1	0	59.21	24.44	0	k__Bacteria;p__Tenericutes;c__Mollicutes	c__Mollicutes
94447.MaxBin.out.042	3.3	201	3	11.62	0.00273971	3157922	49.1	o__Clostridiales (UID1212)	172	263	149	37	6	3	235	24	1	0	0	97.99	8.29	7.41	k__Bacteria;p__Firmicutes;c__Clostridia;o__Clostridiales	o__Clostridiales
94447.MaxBin.out.043	3.3	201	3	10.11	0.00238369	4142810	38.5	k__Bacteria (UID203)	5449	103	57	7	3	52	31	12	8	0	0	60.31	40.35	11.11	k__Bacteria;p__Firmicutes;c__Clostridia;o__Clostridiales;f__Peptostreptococcaceae_3;g__Clostridium_3	g__Clostridium_3
94447.MaxBin.out.044	3.3	201	3	9.93	0.00234125	2959278	35.8	o__Clostridiales (UID1212)	172	263	149	37	0	36	215	12	0	0	0	84.89	4.42	0	k__Bacteria;p__Firmicutes;c__Clostridia;o__Clostridiales;f__Peptostreptococcaceae_3;g__Clostridium_3	g__Clostridium_3
94447.MaxBin.out.045	3.3	201	3	9.51	0.00224222	2328030	66.7	f__Rhodocyclaceae (UID3972)	30	540	241	42	0	28	495	17	0	0	0	93.76	4.13	5.88	k__Bacteria;p__Proteobacteria;c__Betaproteobacteria;o__Rhodocyclales;f__Rhodocyclaceae	f__Rhodocyclaceae
94447.MaxBin.out.046	3.3	201	3	8.92	0.00210311	1948177	60.7	o__Clostridiales (UID1212)	172	263	149	40	0	23	235	5	0	0	0	92.37	2.68	60	k__Bacteria;p__Firmicutes;c__Clostridia;o__Clostridiales	o__Clostridiales
94447.MaxBin.out.047	3.3	201	3	8.76	0.00206539	2630928	47.8	k__Bacteria (UID203)	5449	104	58	16	26	5	46	39	8	6	0	93.1	41.54	2.02	k__Bacteria;p__Synergistetes;c__Synergistia;o__Synergistales;f__Synergistaceae	f__Synergistaceae
94447.MaxBin.out.048	3.3	201	3	8.18	0.00192864	3081433	69.5	k__Bacteria (UID203)	5449	103	58	5	1	75	24	4	0	0	0	41.72	6.9	50	k__Bacteria;p__Firmicutes;c__Clostridia_3;o__Clostridiales_3	o__Clostridiales_3
94447.MaxBin.out.049	3.3	201	3	8.06	0.00190035	2282954	66.4	k__Bacteria (UID203)	5449	103	58	26	12	24	55	24	0	0	0	63.79	25.08	50	k__Bacteria;p__Firmicutes;c__Clostridia_3;o__Clostridiales_3	o__Clostridiales_3
94447.MaxBin.out.050	3.3	201	3	7.24	0.00170701	1816880	39.9	k__Bacteria (UID209)	5443	105	59	32	0	19	85	1	0	0	0	86.75	1.69	0	k__Bacteria	k__Bacteria
94447.MaxBin.out.051	3.3	201	3	7.17	0.00169051	1758511	57.3	p__Firmicutes (UID239)	1324	175	101	39	0	38	131	6	0	0	0	69.06	3	0	k__Bacteria;p__Firmicutes;c__Clostridia_3;o__Clostridiales_3	o__Clostridiales_3
94447.MaxBin.out.052	3.3	201	3	7.1	0.001674	2028769	41	k__Bacteria (UID203)	5449	103	57	15	13	38	42	23	0	0	0	63.48	24.08	4.35	k__Bacteria;p__Firmicutes;c__Clostridia;o__Clostridiales;f__Peptostreptococcaceae_3;g__Clostridium_3	g__Clostridium_3
94447.MaxBin.out.053	3.3	201	3	6.88	0.00162213	2079524	41.4	k__Bacteria (UID203)	5449	103	57	3	1	70	27	4	2	0	0	49.71	14.04	20	k__Bacteria;p__Firmicutes;c__Clostridia;o__Clostridiales;f__Peptostreptococcaceae_3;g__Clostridium_3	g__Clostridium_3
94447.MaxBin.out.054	3.3	201	3	6.47	0.00152546	2959118	44	k__Bacteria (UID203)	5449	103	57	20	12	34	43	18	8	0	0	63.8	28.23	16.67	k__Bacteria;p__Firmicutes;c__Clostridia;o__Clostridiales;f__Peptostreptococcaceae_3;g__Clostridium_3	g__Clostridium_3
94447.MaxBin.out.055	3.3	201	3	6.34	0.00149481	1616367	61.3	o__Clostridiales (UID1212)	172	263	149	23	10	91	146	23	3	0	0	64.22	5.24	3.12	k__Bacteria;p__Firmicutes;c__Clostridia;o__Clostridiales	o__Clostridiales
94447.MaxBin.out.056	3.3	201	3	5.85	0.00137928	3516265	63.4	k__Bacteria (UID3187)	2258	188	117	18	10	81	74	30	3	0	0	53.92	17.12	5.13	k__Bacteria;p__Acidobacteria;c__Acidobacteriia;o__Acidobacteriales	o__Acidobacteriales
94455.MaxBin.out.001	3.3	214	2	843.37	0.211856	997202	48.1	k__Bacteria (UID203)	5449	103	57	8	2	68	30	5	0	0	0	40.27	8.77	0	k__Bacteria;p__Firmicutes;c__Clostridia;o__Clostridiales;f__Peptostreptococcaceae_3;g__Clostridium_3	g__Clostridium_3
94455.MaxBin.out.002	3.3	214	2	499.89	0.125573	4254585	35.5	o__Clostridiales (UID1212)	172	262	148	40	0	8	253	1	0	0	0	97.64	0.68	0	k__Bacteria;p__Firmicutes;c__Clostridia;o__Clostridiales;f__Peptostreptococcaceae_3;g__Clostridium_3;s__Clostridium_clariflavum	s__Clostridium_clariflavum
94455.MaxBin.out.003	3.3	214	2	484.64	0.121742	366028	49	k__Bacteria (UID203)	5449	103	57	1	0	102	1	0	0	0	0	1.75	0	0	k__Bacteria;p__Firmicutes;c__Clostridia;o__Clostridiales;f__Peptostreptococcaceae_3;g__Clostridium_3	g__Clostridium_3
94455.MaxBin.out.004	3.3	214	2	276.97	0.0695752	637015	33.8	root (UID1)	5656	56	24	0	0	56	0	0	0	0	0	0	0	0	NA	NA
94455.MaxBin.out.005	3.3	214	2	240.21	0.0603411	1118034	45.6	o__Clostridiales (UID1212)	172	263	149	36	0	110	152	1	0	0	0	55.81	0.13	0	k__Bacteria;p__Firmicutes;c__Clostridia;o__Clostridiales	o__Clostridiales
94455.MaxBin.out.006	3.3	214	2	225.22	0.0565756	2367451	52.2	o__Clostridiales (UID1120)	304	250	143	41	0	21	222	7	0	0	0	89.16	3.03	28.57	k__Bacteria;p__Firmicutes;c__Clostridia;o__Clostridiales;f__Peptostreptococcaceae_3;g__Clostridium_3	g__Clostridium_3
94455.MaxBin.out.007	3.3	214	2	212.61	0.0534079	619654	47.7	k__Bacteria (UID209)	5443	105	59	20	0	68	37	0	0	0	0	26.16	0	0	k__Bacteria;p__Synergistetes;c__Synergistia;o__Synergistales;f__Synergistaceae	f__Synergistaceae
94455.MaxBin.out.008	3.3	214	2	174.88	0.0439301	1569234	44.5	k__Bacteria (UID203)	5449	102	56	42	0	0	102	0	0	0	0	100	0	0	k__Bacteria	k__Bacteria
94455.MaxBin.out.009	3.3	214	2	128.68	0.0323246	1467445	51	k__Bacteria (UID2328)	3167	126	75	40	0	10	115	1	0	0	0	91.98	1.33	0	k__Bacteria;p__Tenericutes;c__Mollicutes	c__Mollicutes
94455.MaxBin.out.010	3.3	214	2	91.21	0.0229121	2555035	44.9	o__Clostridiales (UID1212)	172	263	149	43	0	7	246	9	1	0	0	96.59	3.69	0	k__Bacteria;p__Firmicutes;c__Clostridia;o__Clostridiales	o__Clostridiales
94455.MaxBin.out.011	3.3	214	2	88.48	0.0222263	3481891	35.2	o__Clostridiales (UID1212)	172	263	149	43	0	2	255	6	0	0	0	98.66	2.59	0	k__Bacteria;p__Firmicutes;c__Clostridia;o__Clostridiales	o__Clostridiales
94455.MaxBin.out.012	3.3	214	2	68.96	0.0173228	2684079	41.7	o__Clostridiales (UID1212)	172	263	149	40	0	39	222	2	0	0	0	82.58	0.69	0	k__Bacteria;p__Firmicutes;c__Clostridia;o__Clostridiales	o__Clostridiales
94455.MaxBin.out.013	3.3	214	2	56.32	0.0141477	2891461	50.6	o__Clostridiales (UID1120)	304	250	143	42	0	11	231	8	0	0	0	96.15	3.61	12.5	k__Bacteria;p__Firmicutes;c__Clostridia;o__Clostridiales;f__Peptostreptococcaceae_3;g__Clostridium_3	g__Clostridium_3
94455.MaxBin.out.014	3.3	214	2	34.55	0.00867901	1393763	50	p__Euryarchaeota (UID3)	148	188	125	34	3	35	139	14	0	0	0	77.78	6.76	71.43	k__Archaea;p__Euryarchaeota;c__Methanobacteria;o__Methanobacteriales;f__Methanobacteriaceae;g__Methanothermobacter	g__Methanothermobacter
94455.MaxBin.out.015	3.3	214	2	31.59	0.00793545	2707526	49.4	k__Bacteria (UID203)	5449	104	58	28	11	9	73	22	0	0	0	89.66	21.24	4.55	k__Bacteria;p__Firmicutes;c__Clostridia;o__Clostridiales	o__Clostridiales
94455.MaxBin.out.016	3.3	214	2	30.45	0.00764908	2628510	48.9	p__Firmicutes (UID241)	930	213	118	43	0	4	206	3	0	0	0	96.61	1.69	0	k__Bacteria;p__Firmicutes	p__Firmicutes
94455.MaxBin.out.017	3.3	214	2	30.1	0.00756116	3224653	62.2	p__Firmicutes (UID239)	1324	176	102	43	0	13	161	2	0	0	0	88.24	0.98	0	k__Bacteria;p__Firmicutes	p__Firmicutes
94455.MaxBin.out.018	3.3	214	2	28.7	0.00720948	2056739	36.8	o__Clostridiales (UID1120)	304	250	143	43	0	13	234	3	0	0	0	92.66	2.1	66.67	k__Bacteria;p__Firmicutes;c__Clostridia;o__Clostridiales	o__Clostridiales
94455.MaxBin.out.019	3.3	214	2	24.69	0.00620216	3720418	41.8	k__Bacteria (UID203)	5449	103	57	30	13	1	80	22	0	0	0	98.25	16.37	59.09	k__Bacteria;p__Firmicutes;c__Clostridia;o__Clostridiales;f__Peptostreptococcaceae_3;g__Clostridium_3	g__Clostridium_3
94455.MaxBin.out.020	3.3	214	2	24.17	0.00607154	2829665	33.7	o__Clostridiales (UID1212)	172	263	149	43	0	3	241	19	0	0	0	97.99	7.44	0	k__Bacteria;p__Firmicutes;c__Clostridia;o__Clostridiales	o__Clostridiales
94455.MaxBin.out.021	3.3	214	2	24.03	0.00603637	2026846	50.3	o__Clostridiales (UID1212)	172	263	149	42	0	9	254	0	0	0	0	95.41	0	0	k__Bacteria;p__Firmicutes;c__Clostridia;o__Clostridiales	o__Clostridiales
94455.MaxBin.out.022	3.3	214	2	23.64	0.0059384	4224561	44.4	o__Clostridiales (UID1212)	172	263	149	37	6	3	234	25	1	0	0	97.99	11.58	0	k__Bacteria;p__Firmicutes;c__Clostridia;o__Clostridiales;f__Peptostreptococcaceae_3;g__Clostridium_3	g__Clostridium_3
94455.MaxBin.out.023	3.3	214	2	22.4	0.00562691	3005961	50.3	k__Bacteria (UID203)	5449	104	58	9	0	60	38	5	0	1	0	64.66	12.07	18.18	k__Bacteria;p__Actinobacteria;c__Actinobacteria	c__Actinobacteria
94455.MaxBin.out.024	3.3	214	2	21.28	0.00534557	2276307	54.6	o__Clostridiales (UID1212)	172	263	149	43	0	3	259	1	0	0	0	98.32	0.67	0	k__Bacteria;p__Firmicutes;c__Clostridia;o__Clostridiales	o__Clostridiales
94455.MaxBin.out.025	3.3	214	2	20.62	0.00517977	1583130	53.3	o__Clostridiales (UID1120)	304	250	143	13	0	103	138	9	0	0	0	70.16	4.55	44.44	k__Bacteria;p__Firmicutes;c__Clostridia;o__Clostridiales;f__Peptostreptococcaceae_3;g__Clostridium_3	g__Clostridium_3
94455.MaxBin.out.026	3.3	214	2	20.62	0.00517977	1020525	52.4	k__Bacteria (UID203)	5449	103	57	9	30	30	29	44	0	0	0	56.14	14.04	84.09	k__Bacteria;p__Firmicutes;c__Clostridia;o__Clostridiales;f__Peptostreptococcaceae_3;g__Clostridium_3	g__Clostridium_3
94455.MaxBin.out.027	3.3	214	2	19.94	0.00500896	2162120	40.9	c__Clostridia (UID1118)	387	223	124	43	0	3	219	1	0	0	0	97.98	0.4	0	k__Bacteria;p__Firmicutes;c__Clostridia;o__Thermoanaerobacterales	o__Thermoanaerobacterales
94455.MaxBin.out.028	3.3	214	2	19.43	0.00488084	1997589	39.9	p__Euryarchaeota (UID3)	148	188	125	43	0	2	186	0	0	0	0	98.93	0	0	k__Archaea;p__Euryarchaeota;c__Methanobacteria;o__Methanobacteriales;f__Methanobacteriaceae;g__Methanobacterium	g__Methanobacterium
94455.MaxBin.out.029	3.3	214	2	17.97	0.00451409	3646817	35.3	o__Clostridiales (UID1212)	172	263	149	25	0	36	213	14	0	0	0	93.39	6.71	0	k__Bacteria;p__Firmicutes;c__Clostridia;o__Clostridiales;f__Peptostreptococcaceae_3;g__Clostridium_3	g__Clostridium_3
94455.MaxBin.out.030	3.3	214	2	17.47	0.00438849	2340231	38.6	p__Firmicutes (UID240)	1318	179	104	43	0	6	169	4	0	0	0	95.19	1.44	0	k__Bacteria;p__Firmicutes;c__Clostridia	c__Clostridia
94455.MaxBin.out.031	3.3	214	2	17.47	0.00438849	2083952	41.2	o__Clostridiales (UID1212)	172	263	149	42	0	2	258	2	1	0	0	98.66	1.68	0	k__Bacteria;p__Firmicutes;c__Clostridia;o__Clostridiales	o__Clostridiales
94455.MaxBin.out.032	3.3	214	2	15.68	0.00393884	3022452	37.4	o__Clostridiales (UID1212)	172	263	149	30	1	31	227	5	0	0	0	90.6	2.37	40	k__Bacteria;p__Firmicutes;c__Clostridia;o__Clostridiales	o__Clostridiales
94455.MaxBin.out.033	3.3	214	2	13.51	0.00339373	3420671	42.4	o__Clostridiales (UID1212)	172	263	149	31	6	47	124	72	17	3	0	84.9	56.1	4.26	k__Bacteria;p__Firmicutes;c__Clostridia;o__Clostridiales	o__Clostridiales
94455.MaxBin.out.034	3.3	214	2	13.19	0.00331335	2832489	30.5	k__Bacteria (UID209)	5443	103	58	42	1	6	92	4	1	0	0	91.38	8.62	42.86	k__Bacteria;p__Thermotogae;c__Thermotogae;o__Thermotogales;f__Thermotogaceae	f__Thermotogaceae
94455.MaxBin.out.035	3.3	214	2	12.93	0.00324803	2834790	38.8	o__Clostridiales (UID1212)	172	263	149	37	5	102	140	21	0	0	0	50.56	6.69	4.76	k__Bacteria;p__Firmicutes;c__Clostridia;o__Clostridiales;f__Peptostreptococcaceae_3;g__Clostridium_3	g__Clostridium_3
94455.MaxBin.out.036	3.3	214	2	11.23	0.00282099	2216685	47.6	o__Clostridiales (UID1212)	172	263	149	41	2	8	238	15	2	0	0	95.53	9.12	0	k__Bacteria;p__Firmicutes;c__Clostridia;o__Clostridiales;f__Ruminococcaceae	f__Ruminococcaceae
94455.MaxBin.out.037	3.3	214	2	10.69	0.00268534	2096790	60.6	o__Clostridiales (UID1212)	172	263	149	43	0	13	240	10	0	0	0	92.73	4.03	0	k__Bacteria;p__Firmicutes;c__Clostridia;o__Clostridiales	o__Clostridiales
94455.MaxBin.out.038	3.3	214	2	10.61	0.00266525	4504957	39.7	o__Clostridiales (UID1212)	172	263	149	25	4	45	125	59	33	1	0	86.13	58.97	0	k__Bacteria;p__Firmicutes;c__Clostridia;o__Clostridiales	o__Clostridiales
94455.MaxBin.out.039	3.3	214	2	10.11	0.00253965	4883796	63	k__Bacteria (UID3187)	2258	184	114	43	0	4	171	9	0	0	0	97.32	5.37	0	k__Bacteria;p__Acidobacteria;c__Acidobacteriia;o__Acidobacteriales	o__Acidobacteriales
94455.MaxBin.out.040	3.3	214	2	8.84	0.00222062	2027625	54	o__Clostridiales (UID1212)	172	263	149	42	0	20	240	3	0	0	0	90.04	1.68	0	k__Bacteria;p__Firmicutes;c__Clostridia;o__Clostridiales	o__Clostridiales
94455.MaxBin.out.041	3.3	214	2	7.77	0.00195183	2622594	43	k__Bacteria (UID203)	5449	103	57	18	20	28	41	29	5	0	0	57.02	22.33	6.82	k__Bacteria;p__Firmicutes;c__Clostridia;o__Clostridiales;f__Peptostreptococcaceae_3;g__Clostridium_3	g__Clostridium_3
94455.MaxBin.out.042	3.3	214	2	7.26	0.00182372	1526479	42.9	p__Firmicutes (UID1022)	100	295	158	24	1	160	130	5	0	0	0	49.69	1.92	0	k__Bacteria;p__Firmicutes;c__Clostridia	c__Clostridia
94455.MaxBin.out.043	3.3	214	2	6.97	0.00175087	3369812	35.6	k__Bacteria (UID3187)	2258	180	109	27	2	30	94	35	14	7	0	90.05	59.01	0	k__Bacteria;p__Nitrospirae;c__Nitrospira;o__Nitrospirales;f__Nitrospiraceae;g__Thermodesulfovibrio	g__Thermodesulfovibrio
94455.MaxBin.out.044	3.3	214	2	6.89	0.00173078	3185536	48.3	k__Bacteria (UID203)	5449	104	58	15	24	9	44	40	11	0	0	91.38	45.82	2.74	k__Bacteria;p__Firmicutes;c__Clostridia;o__Clostridiales_4;f__Syntrophomonadaceae	f__Syntrophomonadaceae
94455.MaxBin.out.045	3.3	214	2	6.49	0.0016303	1850201	52.2	o__Clostridiales (UID1212)	172	263	149	22	2	148	95	19	1	0	0	41.79	7.32	0	k__Bacteria;p__Firmicutes;c__Clostridia;o__Clostridiales	o__Clostridiales
94455.MaxBin.out.046	3.3	214	2	6.32	0.00158759	1694768	40.1	k__Bacteria (UID209)	5443	105	59	36	0	25	78	2	0	0	0	75.5	3.39	0	k__Bacteria	k__Bacteria
94455.MaxBin.out.047	3.3	214	2	5.97	0.00149967	2489522	43.2	c__Clostridia (UID1085)	35	420	196	17	2	213	152	41	14	0	0	51.34	19.94	1.2	k__Bacteria;p__Firmicutes;c__Clostridia;o__Clostridiales_2;f__Peptococcaceae	f__Peptococcaceae
94455.MaxBin.out.048	3.3	214	2	5.85	0.00146953	1379089	67.6	p__Firmicutes (UID239)	1324	175	101	18	0	99	76	0	0	0	0	43.31	0	0	k__Bacteria;p__Firmicutes;c__Clostridia_3;o__Clostridiales_3	o__Clostridiales_3
94457.MaxBin.out.001	3.3	214	3	533.1	0.132941	2375124	47.7	o__Clostridiales (UID1120)	304	250	143	26	4	54	154	42	0	0	0	80.46	18.08	0	k__Bacteria;p__Firmicutes;c__Clostridia;o__Clostridiales;f__Peptostreptococcaceae_3;g__Clostridium_3	g__Clostridium_3
94457.MaxBin.out.002	3.3	214	3	472.63	0.117862	2093145	34.1	o__Clostridiales (UID1212)	172	262	148	11	0	147	115	0	0	0	0	48.02	0	0	k__Bacteria;p__Firmicutes;c__Clostridia;o__Clostridiales;f__Peptostreptococcaceae_3;g__Clostridium_3	g__Clostridium_3
94457.MaxBin.out.003	3.3	214	3	456.2	0.113764	2307108	36.9	o__Clostridiales (UID1212)	172	262	148	32	0	117	145	0	0	0	0	51.29	0	0	k__Bacteria;p__Firmicutes;c__Clostridia;o__Clostridiales;f__Peptostreptococcaceae_3;g__Clostridium_3;s__Clostridium_clariflavum	s__Clostridium_clariflavum
94457.MaxBin.out.004	3.3	214	3	375.23	0.0935726	2923724	50.6	o__Clostridiales (UID1120)	304	250	143	40	2	15	208	26	1	0	0	93.36	8.57	6.9	k__Bacteria;p__Firmicutes;c__Clostridia;o__Clostridiales;f__Peptostreptococcaceae_3;g__Clostridium_3	g__Clostridium_3
94457.MaxBin.out.005	3.3	214	3	288.4	0.0719195	390325	40.4	root (UID1)	5656	56	24	0	0	56	0	0	0	0	0	0	0	0	NA	NA
94457.MaxBin.out.006	3.3	214	3	280.7	0.0699993	1339041	46.6	o__Clostridiales (UID1212)	172	263	149	40	0	54	204	5	0	0	0	74.12	1.81	0	k__Bacteria;p__Firmicutes;c__Clostridia;o__Clostridiales	o__Clostridiales
94457.MaxBin.out.007	3.3	214	3	257.9	0.0643136	1417019	44.8	k__Bacteria (UID203)	5449	102	56	42	0	0	102	0	0	0	0	100	0	0	k__Bacteria	k__Bacteria
94457.MaxBin.out.008	3.3	214	3	139.12	0.0346929	3190789	50.4	k__Bacteria (UID203)	5449	103	57	19	24	2	51	46	3	1	0	96.49	47.69	4.92	k__Bacteria;p__Firmicutes;c__Clostridia;o__Clostridiales;f__Peptostreptococcaceae_3;g__Clostridium_3	g__Clostridium_3
94457.MaxBin.out.009	3.3	214	3	127.89	0.0318924	1385817	30.5	k__Bacteria (UID209)	5443	103	58	37	0	15	87	1	0	0	0	84	0.86	100	k__Bacteria;p__Thermotogae;c__Thermotogae;o__Thermotogales;f__Thermotogaceae	f__Thermotogaceae
94457.MaxBin.out.010	3.3	214	3	117.22	0.0292316	2261707	40.9	c__Clostridia (UID1118)	387	223	124	43	0	3	219	1	0	0	0	97.98	0.4	0	k__Bacteria;p__Firmicutes;c__Clostridia;o__Thermoanaerobacterales	o__Thermoanaerobacterales
94457.MaxBin.out.011	3.3	214	3	113.65	0.0283414	2987696	42.8	o__Clostridiales (UID1120)	304	250	143	34	1	13	228	9	0	0	0	97.27	3.85	0	k__Bacteria;p__Firmicutes;c__Clostridia;o__Clostridiales;f__Peptostreptococcaceae_3;g__Clostridium_3	g__Clostridium_3
94457.MaxBin.out.012	3.3	214	3	93.47	0.023309	522934	33.4	k__Bacteria (UID203)	5449	102	57	2	0	99	3	0	0	0	0	2.07	0	0	k__Bacteria;p__Thermotogae;c__Thermotogae;o__Thermotogales;f__Thermotogaceae	f__Thermotogaceae
94457.MaxBin.out.013	3.3	214	3	69.48	0.0173265	1690905	49.5	p__Euryarchaeota (UID3)	148	188	125	41	2	0	185	3	0	0	0	100	0.18	0	k__Archaea;p__Euryarchaeota;c__Methanobacteria;o__Methanobacteriales;f__Methanobacteriaceae;g__Methanothermobacter	g__Methanothermobacter
94457.MaxBin.out.014	3.3	214	3	57.18	0.0142592	3636225	39.1	o__Clostridiales (UID1212)	172	263	149	43	0	4	258	1	0	0	0	97.99	0.34	0	k__Bacteria;p__Firmicutes;c__Clostridia;o__Clostridiales;f__Peptostreptococcaceae_3;g__Clostridium_3;s__Clostridium_thermocellum	s__Clostridium_thermocellum
94457.MaxBin.out.015	3.3	214	3	54.64	0.0136258	2783633	52.2	o__Clostridiales (UID1120)	304	250	143	35	7	11	209	27	3	0	0	95.31	11.98	16.67	k__Bacteria;p__Firmicutes;c__Clostridia;o__Clostridiales;f__Peptostreptococcaceae_3;g__Clostridium_3	g__Clostridium_3
94457.MaxBin.out.016	3.3	214	3	54.24	0.013526	2146813	33.2	c__Bacilli (UID285)	586	325	181	43	0	37	277	11	0	0	0	85.28	4.42	9.09	k__Bacteria;p__Firmicutes;c__Bacilli	c__Bacilli
94457.MaxBin.out.017	3.3	214	3	49.21	0.0122717	3309410	44.4	o__Clostridiales (UID1212)	172	263	149	43	0	6	241	16	0	0	0	97.26	5.37	0	k__Bacteria;p__Firmicutes;c__Clostridia;o__Clostridiales	o__Clostridiales
94457.MaxBin.out.018	3.3	214	3	46.61	0.0116233	1654997	50.5	k__Bacteria (UID2328)	3167	126	75	43	0	2	124	0	0	0	0	97.33	0	0	k__Bacteria;p__Tenericutes;c__Mollicutes	c__Mollicutes
94457.MaxBin.out.019	3.3	214	3	45.63	0.0113789	2263271	36.6	o__Clostridiales (UID1120)	304	250	143	42	1	5	243	2	0	0	0	96.5	0.37	100	k__Bacteria;p__Firmicutes;c__Clostridia;o__Clostridiales	o__Clostridiales
94457.MaxBin.out.020	3.3	214	3	43.32	0.0108029	2166099	48.3	c__Clostridia (UID1118)	387	223	124	42	1	15	197	11	0	0	0	93.93	7.93	36.36	k__Bacteria;p__Firmicutes;c__Clostridia;o__Thermoanaerobacterales	o__Thermoanaerobacterales
94457.MaxBin.out.021	3.3	214	3	33.13	0.00826176	2599350	48.9	p__Firmicutes (UID241)	930	213	118	43	0	4	206	3	0	0	0	96.61	1.69	0	k__Bacteria;p__Firmicutes	p__Firmicutes
94457.MaxBin.out.022	3.3	214	3	27.6	0.00688272	2143445	49.8	o__Clostridiales (UID1212)	172	263	149	42	0	8	255	0	0	0	0	96.09	0	0	k__Bacteria;p__Firmicutes;c__Clostridia;o__Clostridiales	o__Clostridiales
94457.MaxBin.out.023	3.3	214	3	25.47	0.00635156	3073698	33.6	o__Clostridiales (UID1212)	172	263	149	43	0	3	256	4	0	0	0	97.99	1.9	0	k__Bacteria;p__Firmicutes;c__Clostridia;o__Clostridiales	o__Clostridiales
94457.MaxBin.out.024	3.3	214	3	23.61	0.00588772	2939361	41.7	o__Clostridiales (UID1212)	172	263	149	42	0	11	249	3	0	0	0	96.76	2.01	33.33	k__Bacteria;p__Firmicutes;c__Clostridia;o__Clostridiales	o__Clostridiales
94457.MaxBin.out.025	3.3	214	3	19.68	0.00490768	1257516	27.9	root (UID1)	5656	56	24	0	0	55	1	0	0	0	0	4.17	0	0	NA	NA
94457.MaxBin.out.026	3.3	214	3	16.93	0.0042219	209538	36	root (UID1)	5656	56	24	0	0	56	0	0	0	0	0	0	0	0	NA	NA
94457.MaxBin.out.027	3.3	214	3	16.42	0.00409472	2129647	47.7	o__Clostridiales (UID1212)	172	263	149	43	0	7	251	4	1	0	0	95.75	3.69	0	k__Bacteria;p__Firmicutes;c__Clostridia;o__Clostridiales;f__Ruminococcaceae	f__Ruminococcaceae
94457.MaxBin.out.028	3.3	214	3	14.84	0.00370071	2063308	41.2	o__Clostridiales (UID1212)	172	263	149	42	0	2	257	4	0	0	0	98.66	1.68	50	k__Bacteria;p__Firmicutes;c__Clostridia;o__Clostridiales	o__Clostridiales
94457.MaxBin.out.029	3.3	214	3	14.31	0.00356854	3413316	41.7	k__Bacteria (UID203)	5449	103	57	17	12	19	67	17	0	0	0	90.59	9.36	94.12	k__Bacteria;p__Firmicutes;c__Clostridia;o__Clostridiales;f__Peptostreptococcaceae_3;g__Clostridium_3	g__Clostridium_3
94457.MaxBin.out.030	3.3	214	3	13.9	0.0034663	3332133	41.3	k__Archaea (UID2)	207	149	107	32	11	2	134	13	0	0	0	98.13	6.06	0	k__Archaea;p__Euryarchaeota;c__Methanomicrobia;o__Methanosarcinales;f__Methanosarcinaceae	f__Methanosarcinaceae
94457.MaxBin.out.031	3.3	214	3	13.53	0.00337403	2614294	44.6	o__Clostridiales (UID1212)	172	263	149	41	1	52	192	18	1	0	0	74.5	7.09	0	k__Bacteria;p__Firmicutes;c__Clostridia;o__Clostridiales;f__Peptostreptococcaceae_3;g__Clostridium_3	g__Clostridium_3
94457.MaxBin.out.032	3.3	214	3	11.64	0.00290271	2652617	52.6	k__Bacteria (UID203)	5449	104	58	30	13	6	79	19	0	0	0	91.38	7.68	0	k__Bacteria;p__Firmicutes	p__Firmicutes
94457.MaxBin.out.033	3.3	214	3	11.43	0.00285035	3711132	41.9	k__Bacteria (UID203)	5449	103	57	27	11	15	61	23	4	0	0	85.17	40.67	5.71	k__Bacteria;p__Firmicutes;c__Clostridia;o__Clostridiales;f__Peptostreptococcaceae_3;g__Clostridium_3	g__Clostridium_3
94457.MaxBin.out.034	3.3	214	3	9.73	0.00242641	1998803	34.3	k__Bacteria (UID3187)	2258	180	109	38	3	7	149	21	3	0	0	95.36	18.99	0	k__Bacteria;p__Nitrospirae;c__Nitrospira;o__Nitrospirales;f__Nitrospiraceae;g__Thermodesulfovibrio	g__Thermodesulfovibrio
94457.MaxBin.out.035	3.3	214	3	8.95	0.0022319	4095086	37.7	o__Clostridiales (UID1212)	172	263	149	15	3	91	109	53	10	0	0	74.5	26.77	4.82	k__Bacteria;p__Firmicutes;c__Clostridia;o__Clostridiales;f__Peptostreptococcaceae_3;g__Clostridium_3	g__Clostridium_3
94457.MaxBin.out.036	3.3	214	3	8.62	0.0021496	3552871	51.1	o__Clostridiales (UID1212)	172	263	149	26	10	42	127	75	18	1	0	82.07	45.57	0.74	k__Bacteria;p__Firmicutes;c__Clostridia;o__Clostridiales	o__Clostridiales
94457.MaxBin.out.037	3.3	214	3	8.28	0.00206482	2131629	54.6	o__Clostridiales (UID1212)	172	263	149	39	4	23	204	35	1	0	0	90.83	12.11	2.63	k__Bacteria;p__Firmicutes;c__Clostridia;o__Clostridiales	o__Clostridiales
94457.MaxBin.out.038	3.3	214	3	7.75	0.00193265	4122374	38.4	k__Bacteria (UID203)	5449	104	58	12	15	29	36	33	1	5	0	80.03	55.49	4.55	k__Bacteria;p__Firmicutes;c__Clostridia	c__Clostridia
94457.MaxBin.out.039	3.3	214	3	7.73	0.00192766	3750530	33.9	o__Clostridiales (UID1120)	304	250	143	17	4	122	81	29	11	4	3	52.96	34.83	0	k__Bacteria;p__Firmicutes;c__Clostridia;o__Clostridiales;f__Peptostreptococcaceae_3;g__Clostridium_3	g__Clostridium_3
94457.MaxBin.out.040	3.3	214	3	7.62	0.00190023	1755917	60.6	o__Clostridiales (UID1212)	172	263	149	37	0	46	210	7	0	0	0	83.33	3.19	0	k__Bacteria;p__Firmicutes;c__Clostridia;o__Clostridiales	o__Clostridiales
94457.MaxBin.out.041	3.3	214	3	7.58	0.00189026	2038493	43.2	k__Bacteria (UID203)	5449	104	58	23	17	13	65	25	1	0	0	81.9	13.18	3.57	k__Bacteria;p__Firmicutes	p__Firmicutes
94457.MaxBin.out.042	3.3	214	3	7.38	0.00184038	2857293	68.5	p__Firmicutes (UID239)	1324	175	101	18	0	53	121	1	0	0	0	83.24	0.99	0	k__Bacteria;p__Firmicutes;c__Clostridia_3;o__Clostridiales_3	o__Clostridiales_3
94457.MaxBin.out.043	3.3	214	3	6.82	0.00170073	1984401	44.7	k__Bacteria (UID203)	5449	104	58	19	12	45	38	20	1	0	0	51.33	13.4	8.7	k__Bacteria;p__Firmicutes;c__Clostridia	c__Clostridia
94457.MaxBin.out.044	3.3	214	3	5.88	0.00146632	1262850	61.8	k__Bacteria (UID203)	5449	104	58	11	20	46	31	26	1	0	0	42.32	11.44	0	k__Bacteria;p__Firmicutes	p__Firmicutes
94457.MaxBin.out.045	3.3	214	3	5.39	0.00134413	574992	65.4	f__Rhodocyclaceae (UID3972)	30	540	241	18	0	409	131	0	0	0	0	22.11	0	0	k__Bacteria;p__Proteobacteria;c__Betaproteobacteria;o__Rhodocyclales;f__Rhodocyclaceae	f__Rhodocyclaceae
94444.MaxBin.out.001	5	180	3	1006.39	0.155746	376526	47.9	root (UID1)	5656	56	24	0	0	55	1	0	0	0	0	4.17	0	0	NA	NA
94444.MaxBin.out.002	5	180	3	432.12	0.0668738	4620739	35.4	o__Clostridiales (UID1212)	172	262	148	43	0	1	258	3	0	0	0	99.32	1.01	0	k__Bacteria;p__Firmicutes;c__Clostridia;o__Clostridiales;f__Peptostreptococcaceae_3;g__Clostridium_3;s__Clostridium_clariflavum	s__Clostridium_clariflavum
94444.MaxBin.out.003	5	180	3	391.08	0.0605226	751777	48.2	root (UID1)	5656	56	24	0	1	55	0	1	0	0	0	4.17	4.17	100	NA	NA
94444.MaxBin.out.004	5	180	3	388.19	0.0600753	313144	51.8	k__Bacteria (UID203)	5449	103	57	2	0	94	9	0	0	0	0	14.04	0	0	k__Bacteria;p__Firmicutes;c__Clostridia;o__Clostridiales;f__Peptostreptococcaceae_3;g__Clostridium_3	g__Clostridium_3
94444.MaxBin.out.005	5	180	3	382.86	0.0592505	629152	51.6	k__Bacteria (UID203)	5449	103	57	2	0	97	6	0	0	0	0	9.65	0	0	k__Bacteria;p__Proteobacteria;c__Alphaproteobacteria;o__Rickettsiales	o__Rickettsiales
94444.MaxBin.out.006	5	180	3	382.47	0.0591901	102894	51	root (UID1)	5656	56	24	0	0	56	0	0	0	0	0	0	0	0	NA	NA
94444.MaxBin.out.007	5	180	3	359.02	0.0555611	1321449	53.2	o__Clostridiales (UID1120)	304	250	143	10	9	117	116	17	0	0	0	57.76	5.9	47.06	k__Bacteria;p__Firmicutes;c__Clostridia;o__Clostridiales;f__Peptostreptococcaceae_3;g__Clostridium_3	g__Clostridium_3
94444.MaxBin.out.008	5	180	3	357.42	0.0553134	1103386	44.6	k__Bacteria (UID203)	5449	102	56	37	1	13	87	2	0	0	0	81.82	0.32	0	k__Bacteria	k__Bacteria
94444.MaxBin.out.009	5	180	3	344.99	0.0533898	1203631	51.7	o__Clostridiales (UID1120)	304	250	143	12	0	115	132	3	0	0	0	62.9	2.1	33.33	k__Bacteria;p__Firmicutes;c__Clostridia;o__Clostridiales;f__Peptostreptococcaceae_3;g__Clostridium_3	g__Clostridium_3
94444.MaxBin.out.010	5	180	3	270.34	0.0418372	2328010	47.3	o__Clostridiales (UID1120)	304	250	143	37	2	28	210	12	0	0	0	89.62	4.84	0	k__Bacteria;p__Firmicutes;c__Clostridia;o__Clostridiales;f__Peptostreptococcaceae_3;g__Clostridium_3	g__Clostridium_3
94444.MaxBin.out.011	5	180	3	250.95	0.0388364	1263223	45.6	o__Clostridiales (UID1212)	172	263	149	39	1	69	192	2	0	0	0	68.91	0.16	50	k__Bacteria;p__Firmicutes;c__Clostridia;o__Clostridiales	o__Clostridiales
94444.MaxBin.out.012	5	180	3	223.24	0.0345481	1229577	33.7	o__Clostridiales (UID1212)	172	263	149	35	0	130	130	3	0	0	0	42.06	1.34	0	k__Bacteria;p__Firmicutes;c__Clostridia;o__Clostridiales	o__Clostridiales
94444.MaxBin.out.013	5	180	3	213.59	0.0330547	1349410	33.7	k__Bacteria (UID203)	5449	103	57	8	0	68	35	0	0	0	0	54.39	0	0	k__Bacteria;p__Firmicutes;c__Clostridia;o__Clostridiales	o__Clostridiales
94444.MaxBin.out.014	5	180	3	180.55	0.0279415	1545658	49.4	k__Bacteria (UID209)	5443	105	59	30	2	36	63	6	0	0	0	57.01	8.63	0	k__Bacteria;p__Synergistetes;c__Synergistia;o__Synergistales;f__Synergistaceae	f__Synergistaceae
94444.MaxBin.out.015	5	180	3	156.68	0.0242474	629817	40.4	o__Clostridiales (UID1212)	172	263	149	14	0	234	29	0	0	0	0	5.03	0	0	k__Bacteria;p__Firmicutes;c__Clostridia;o__Clostridiales	o__Clostridiales
94444.MaxBin.out.016	5	180	3	109.23	0.0169042	2913059	45.3	o__Clostridiales (UID1212)	172	263	149	29	1	29	217	16	1	0	0	94.93	9.28	0	k__Bacteria;p__Firmicutes;c__Clostridia;o__Clostridiales	o__Clostridiales
94444.MaxBin.out.017	5	180	3	84.69	0.0131064	1701061	49.5	p__Euryarchaeota (UID3)	148	188	125	41	2	1	184	3	0	0	0	99.6	0.18	0	k__Archaea;p__Euryarchaeota;c__Methanobacteria;o__Methanobacteriales;f__Methanobacteriaceae;g__Methanothermobacter	g__Methanothermobacter
94444.MaxBin.out.018	5	180	3	78.24	0.0121082	3852141	38.9	o__Clostridiales (UID1212)	172	263	149	43	0	4	254	4	1	0	0	97.99	2.01	0	k__Bacteria;p__Firmicutes;c__Clostridia;o__Clostridiales;f__Peptostreptococcaceae_3;g__Clostridium_3;s__Clostridium_thermocellum	s__Clostridium_thermocellum
94444.MaxBin.out.019	5	180	3	60.85	0.009417	2003940	30.7	k__Bacteria (UID209)	5443	103	58	42	0	6	97	0	0	0	0	91.21	0	0	k__Bacteria;p__Thermotogae;c__Thermotogae;o__Thermotogales;f__Thermotogaceae	f__Thermotogaceae
94444.MaxBin.out.020	5	180	3	53.83	0.0083306	2239722	40.8	c__Clostridia (UID1118)	387	223	124	43	0	3	219	1	0	0	0	97.98	0.4	0	k__Bacteria;p__Firmicutes;c__Clostridia;o__Thermoanaerobacterales	o__Thermoanaerobacterales
94444.MaxBin.out.021	5	180	3	49.32	0.00763264	2737825	41.7	o__Clostridiales (UID1212)	172	263	149	41	1	28	227	8	0	0	0	89.41	2.35	25	k__Bacteria;p__Firmicutes;c__Clostridia;o__Clostridiales	o__Clostridiales
94444.MaxBin.out.022	5	180	3	46.54	0.00720242	2520825	49.1	p__Firmicutes (UID241)	930	213	118	43	0	7	203	2	1	0	0	94.07	2.12	20	k__Bacteria;p__Firmicutes	p__Firmicutes
94444.MaxBin.out.023	5	180	3	44.36	0.00686505	1659449	50.5	k__Bacteria (UID2328)	3167	126	75	43	0	2	123	1	0	0	0	97.33	1.33	100	k__Bacteria;p__Tenericutes;c__Mollicutes	c__Mollicutes
94444.MaxBin.out.024	5	180	3	39.3	0.00608197	2045338	33.2	c__Bacilli (UID285)	586	325	181	42	1	45	268	12	0	0	0	83.15	4.16	25	k__Bacteria;p__Firmicutes;c__Bacilli	c__Bacilli
94444.MaxBin.out.025	5	180	3	37.33	0.0057771	2794127	51.2	o__Clostridiales (UID1120)	304	250	143	32	2	32	196	22	0	0	0	89.23	10.26	9.09	k__Bacteria;p__Firmicutes;c__Clostridia;o__Clostridiales;f__Peptostreptococcaceae_3;g__Clostridium_3	g__Clostridium_3
94444.MaxBin.out.026	5	180	3	36.99	0.00572448	2708278	47.7	c__Clostridia (UID1118)	387	223	124	32	0	29	186	7	1	0	0	88.89	6.18	10	k__Bacteria;p__Firmicutes;c__Clostridia;o__Thermoanaerobacterales	o__Thermoanaerobacterales
94444.MaxBin.out.027	5	180	3	35.98	0.00556818	3563762	35.4	o__Clostridiales (UID1212)	172	263	149	43	0	6	240	15	2	0	0	97.09	8.63	0	k__Bacteria;p__Firmicutes;c__Clostridia;o__Clostridiales	o__Clostridiales
94444.MaxBin.out.028	5	180	3	34.79	0.00538402	2269452	53.2	o__Clostridiales (UID1120)	304	250	143	33	10	17	213	14	6	0	0	90.21	4.27	31.25	k__Bacteria;p__Firmicutes;c__Clostridia;o__Clostridiales;f__Peptostreptococcaceae_3;g__Clostridium_3	g__Clostridium_3
94444.MaxBin.out.029	5	180	3	31.72	0.00490891	2105134	36.7	o__Clostridiales (UID1120)	304	250	143	43	0	8	236	6	0	0	0	94.76	1.65	33.33	k__Bacteria;p__Firmicutes;c__Clostridia;o__Clostridiales	o__Clostridiales
94444.MaxBin.out.030	5	180	3	31.65	0.00489808	3567403	41.8	o__Clostridiales (UID1120)	304	250	143	42	1	10	229	11	0	0	0	96.57	4.9	0	k__Bacteria;p__Firmicutes;c__Clostridia;o__Clostridiales;f__Peptostreptococcaceae_3;g__Clostridium_3	g__Clostridium_3
94444.MaxBin.out.031	5	180	3	27.01	0.00418	3274806	37.8	o__Clostridiales (UID1212)	172	263	149	43	0	0	261	2	0	0	0	100	0.67	0	k__Bacteria;p__Firmicutes;c__Clostridia;o__Clostridiales	o__Clostridiales
94444.MaxBin.out.032	5	180	3	20.94	0.00324062	2013766	50.2	o__Clostridiales (UID1212)	172	263	149	41	1	13	247	3	0	0	0	93.18	1.01	33.33	k__Bacteria;p__Firmicutes;c__Clostridia;o__Clostridiales	o__Clostridiales
94444.MaxBin.out.033	5	180	3	20.38	0.00315396	3121721	41.4	p__Euryarchaeota (UID49)	95	228	153	43	0	3	224	1	0	0	0	99.18	0.65	0	k__Archaea;p__Euryarchaeota;c__Methanomicrobia;o__Methanosarcinales;f__Methanosarcinaceae	f__Methanosarcinaceae
94444.MaxBin.out.034	5	180	3	18.86	0.00291873	2025263	41.2	o__Clostridiales (UID1212)	172	263	149	42	0	2	260	1	0	0	0	98.66	0.34	0	k__Bacteria;p__Firmicutes;c__Clostridia;o__Clostridiales	o__Clostridiales
94444.MaxBin.out.035	5	180	3	18.27	0.00282742	2256544	66.3	f__Rhodocyclaceae (UID3972)	30	540	241	43	0	13	526	1	0	0	0	96.13	0.21	0	k__Bacteria;p__Proteobacteria;c__Betaproteobacteria;o__Rhodocyclales;f__Rhodocyclaceae	f__Rhodocyclaceae
94444.MaxBin.out.036	5	180	3	15.45	0.002391	1969549	47.7	o__Clostridiales (UID1212)	172	263	149	43	0	7	255	1	0	0	0	95.75	0.34	0	k__Bacteria;p__Firmicutes;c__Clostridia;o__Clostridiales;f__Ruminococcaceae	f__Ruminococcaceae
94444.MaxBin.out.037	5	180	3	15.21	0.00235386	3072299	43.5	o__Clostridiales (UID1120)	304	250	143	43	0	8	230	12	0	0	0	94.76	6.99	0	k__Bacteria;p__Firmicutes;c__Clostridia;o__Clostridiales;f__Peptostreptococcaceae_3;g__Clostridium_3	g__Clostridium_3
94444.MaxBin.out.038	5	180	3	14.1	0.00218208	2476237	43.2	p__Firmicutes (UID241)	930	213	118	43	0	10	195	7	1	0	0	96.61	5.93	0	k__Bacteria;p__Firmicutes	p__Firmicutes
94444.MaxBin.out.039	5	180	3	13.73	0.00212482	3769598	34.4	k__Bacteria (UID203)	5449	103	57	8	0	65	37	1	0	0	0	57.89	1.75	0	k__Bacteria;p__Firmicutes;c__Clostridia;o__Clostridiales;f__Peptostreptococcaceae_3;g__Clostridium_3	g__Clostridium_3
94444.MaxBin.out.040	5	180	3	13.55	0.00209696	3650363	44.2	o__Clostridiales (UID1212)	172	263	149	36	7	4	243	15	1	0	0	97.32	5.54	5.56	k__Bacteria;p__Firmicutes;c__Clostridia;o__Clostridiales;f__Peptostreptococcaceae_3;g__Clostridium_3	g__Clostridium_3
94444.MaxBin.out.041	5	180	3	12.34	0.00190971	2787162	33.2	k__Bacteria (UID3187)	2258	180	109	42	0	1	166	12	1	0	0	99.95	9.63	0	k__Bacteria;p__Nitrospirae;c__Nitrospira;o__Nitrospirales;f__Nitrospiraceae;g__Thermodesulfovibrio	g__Thermodesulfovibrio
94444.MaxBin.out.042	5	180	3	11.68	0.00180757	3903944	65.1	k__Bacteria (UID1452)	924	163	110	36	0	17	143	3	0	0	0	91.32	2.73	33.33	k__Bacteria;p__Chloroflexi	p__Chloroflexi
94444.MaxBin.out.043	5	180	3	11.41	0.00176578	2346048	54.8	o__Clostridiales (UID1212)	172	263	149	40	3	7	226	30	0	0	0	95.75	11.51	3.33	k__Bacteria;p__Firmicutes;c__Clostridia;o__Clostridiales;f__Ruminococcaceae	f__Ruminococcaceae
94444.MaxBin.out.044	5	180	3	11.18	0.00173019	3524975	49.1	o__Clostridiales (UID1212)	172	263	149	39	4	3	219	39	2	0	0	97.99	17.28	13.33	k__Bacteria;p__Firmicutes;c__Clostridia;o__Clostridiales	o__Clostridiales
94444.MaxBin.out.045	5	180	3	10.78	0.00166829	2692200	42.6	o__Clostridiales (UID1120)	304	250	143	38	3	21	208	21	0	0	0	89.16	9.48	19.05	k__Bacteria;p__Firmicutes;c__Clostridia;o__Clostridiales;f__Peptostreptococcaceae_3;g__Clostridium_3	g__Clostridium_3
94444.MaxBin.out.046	5	180	3	10.66	0.00164972	2984731	54.1	k__Bacteria (UID203)	5449	104	58	28	15	3	59	35	7	0	0	94.83	52.9	3.57	k__Bacteria;p__Firmicutes;c__Clostridia;o__Clostridiales	o__Clostridiales
94444.MaxBin.out.047	5	180	3	9.89	0.00153055	3750914	39.3	k__Bacteria (UID203)	5449	103	57	19	20	19	51	26	7	0	0	71.05	18.42	4.26	k__Bacteria;p__Firmicutes;c__Clostridia;o__Clostridiales;f__Peptostreptococcaceae_3;g__Clostridium_3	g__Clostridium_3
94444.MaxBin.out.048	5	180	3	9.86	0.00152591	4943108	37.2	o__Clostridiales (UID1120)	304	250	143	36	5	9	145	65	23	5	3	95.38	62.9	0.52	k__Bacteria;p__Firmicutes;c__Clostridia;o__Clostridiales	o__Clostridiales
94444.MaxBin.out.049	5	180	3	9.44	0.00146091	1412706	48.8	k__Bacteria (UID209)	5443	105	59	20	10	24	69	5	7	0	0	74.88	6.01	3.85	k__Bacteria;p__Synergistetes;c__Synergistia;o__Synergistales;f__Synergistaceae	f__Synergistaceae
94444.MaxBin.out.050	5	180	3	9.25	0.00143151	2370529	52.3	p__Firmicutes (UID239)	1324	176	102	43	0	14	160	2	0	0	0	90.52	1.47	0	k__Bacteria;p__Firmicutes	p__Firmicutes
94444.MaxBin.out.051	5	180	3	8.94	0.00138353	2037361	60.7	o__Clostridiales (UID1212)	172	263	149	42	1	13	244	6	0	0	0	92.95	2.75	0	k__Bacteria;p__Firmicutes;c__Clostridia;o__Clostridiales	o__Clostridiales
94444.MaxBin.out.052	5	180	3	8.82	0.00136496	3074905	42.4	k__Bacteria (UID203)	5449	103	57	18	23	4	57	41	1	0	0	93.86	24.99	11.36	k__Bacteria;p__Firmicutes;c__Clostridia;o__Clostridiales;f__Peptostreptococcaceae_3;g__Clostridium_3	g__Clostridium_3
94444.MaxBin.out.053	5	180	3	8.8	0.00136187	2964112	62.6	k__Bacteria (UID203)	5449	104	58	19	24	8	66	25	5	0	0	88.79	11.6	10	k__Bacteria;p__Firmicutes	p__Firmicutes
94444.MaxBin.out.054	5	180	3	8.67	0.00134175	4552333	68.6	p__Firmicutes (UID239)	1324	175	101	19	0	36	114	23	2	0	0	94.28	22.44	24.14	k__Bacteria;p__Firmicutes;c__Clostridia_3;o__Clostridiales_3	o__Clostridiales_3
94444.MaxBin.out.055	5	180	3	7.94	0.00122878	1968218	39.9	k__Bacteria (UID209)	5443	105	59	42	0	6	99	0	0	0	0	89.83	0	0	k__Bacteria	k__Bacteria
94444.MaxBin.out.056	5	180	3	6.95	0.00107557	1401806	57.6	p__Firmicutes (UID239)	1324	175	101	21	7	93	72	9	1	0	0	36.53	2.29	0	k__Bacteria;p__Firmicutes;c__Clostridia_3;o__Clostridiales_3	o__Clostridiales_3
94444.MaxBin.out.057	5	180	3	6.74	0.00104307	3828818	44.3	k__Bacteria (UID203)	5449	104	58	14	15	20	40	38	5	1	0	89.18	61.05	0	k__Bacteria;p__Firmicutes;c__Clostridia;o__Clostridiales_2;f__Peptococcaceae	f__Peptococcaceae
94444.MaxBin.out.058	5	180	3	6.16	0.000953307	3471372	63	k__Bacteria (UID3187)	2258	184	114	35	2	42	128	13	1	0	0	75.31	10.58	0	k__Bacteria;p__Acidobacteria;c__Acidobacteriia;o__Acidobacteriales	o__Acidobacteriales
94450.MaxBin.out.001	10	142	2	545.76	0.144363	2136429	34.1	o__Clostridiales (UID1212)	172	262	148	10	0	150	112	0	0	0	0	50.75	0	0	k__Bacteria;p__Firmicutes;c__Clostridia;o__Clostridiales;f__Peptostreptococcaceae_3;g__Clostridium_3;s__Clostridium_clariflavum	s__Clostridium_clariflavum
94450.MaxBin.out.002	10	142	2	538.17	0.142356	1869658	37.8	o__Clostridiales (UID1212)	172	262	148	31	0	142	120	0	0	0	0	36.12	0	0	k__Bacteria;p__Firmicutes;c__Clostridia;o__Clostridiales;f__Peptostreptococcaceae_3;g__Clostridium_3;s__Clostridium_clariflavum	s__Clostridium_clariflavum
94450.MaxBin.out.003	10	142	2	404.11	0.106894	2226971	51.9	o__Clostridiales (UID1120)	304	250	143	39	0	31	215	4	0	0	0	84.27	1.25	25	k__Bacteria;p__Firmicutes;c__Clostridia;o__Clostridiales;f__Peptostreptococcaceae_3;g__Clostridium_3	g__Clostridium_3
94450.MaxBin.out.004	10	142	2	342.42	0.0905763	563956	32.8	k__Bacteria (UID203)	5449	102	57	2	0	94	8	0	0	0	0	9.06	0	0	k__Bacteria;p__Thermotogae;c__Thermotogae;o__Thermotogales;f__Thermotogaceae	f__Thermotogaceae
94450.MaxBin.out.005	10	142	2	332.7	0.0880052	2018054	47.1	o__Clostridiales (UID1120)	304	250	143	28	1	54	179	17	0	0	0	80.15	8.28	0	k__Bacteria;p__Firmicutes;c__Clostridia;o__Clostridiales;f__Peptostreptococcaceae_3;g__Clostridium_3	g__Clostridium_3
94450.MaxBin.out.006	10	142	2	269.63	0.071322	1545505	49.7	k__Bacteria (UID209)	5443	105	59	14	8	46	44	11	4	0	0	57.86	12.39	8.7	k__Bacteria;p__Synergistetes;c__Synergistia;o__Synergistales;f__Synergistaceae	f__Synergistaceae
94450.MaxBin.out.007	10	142	2	155.26	0.0410691	3016535	45.5	o__Clostridiales (UID1212)	172	263	149	39	3	9	197	57	0	0	0	95.53	25.25	0	k__Bacteria;p__Firmicutes;c__Clostridia;o__Clostridiales	o__Clostridiales
94450.MaxBin.out.008	10	142	2	114.87	0.0303852	2963008	50.5	o__Clostridiales (UID1120)	304	250	143	38	5	3	219	28	0	0	0	97.9	8.95	7.14	k__Bacteria;p__Firmicutes;c__Clostridia;o__Clostridiales;f__Peptostreptococcaceae_3;g__Clostridium_3	g__Clostridium_3
94450.MaxBin.out.009	10	142	2	105.87	0.0280045	3086911	33.6	o__Clostridiales (UID1212)	172	263	149	42	1	4	252	7	0	0	0	97.32	3.91	0	k__Bacteria;p__Firmicutes;c__Clostridia;o__Clostridiales	o__Clostridiales
94450.MaxBin.out.010	10	142	2	91.7	0.0242563	1097550	44.5	k__Bacteria (UID203)	5449	102	56	30	1	23	77	2	0	0	0	76.95	1.06	100	k__Bacteria	k__Bacteria
94450.MaxBin.out.011	10	142	2	88.37	0.0233755	2046762	33.2	c__Bacilli (UID285)	586	325	181	43	0	38	274	13	0	0	0	85.01	5.52	23.08	k__Bacteria;p__Firmicutes;c__Bacilli	c__Bacilli
94450.MaxBin.out.012	10	142	2	77.81	0.0205822	2636084	44.8	o__Clostridiales (UID1212)	172	263	149	36	7	6	246	11	0	0	0	97.26	0.99	54.55	k__Bacteria;p__Firmicutes;c__Clostridia;o__Clostridiales	o__Clostridiales
94450.MaxBin.out.013	10	142	2	65.04	0.0172043	2564399	41.4	o__Clostridiales (UID1212)	172	263	149	33	0	49	214	0	0	0	0	82.23	0	0	k__Bacteria;p__Firmicutes;c__Clostridia;o__Clostridiales	o__Clostridiales
94450.MaxBin.out.014	10	142	2	62.14	0.0164372	2486550	52.9	p__Firmicutes (UID239)	1324	176	102	43	0	5	169	2	0	0	0	95.1	1.47	0	k__Bacteria;p__Firmicutes	p__Firmicutes
94450.MaxBin.out.015	10	142	2	44.57	0.0117896	4289032	37.6	o__Clostridiales (UID1212)	172	263	149	43	0	2	257	4	0	0	0	98.66	1.9	25	k__Bacteria;p__Firmicutes;c__Clostridia;o__Clostridiales;f__Peptostreptococcaceae_3;g__Clostridium_3	g__Clostridium_3
94450.MaxBin.out.016	10	142	2	44.56	0.0117869	2592788	49.2	p__Firmicutes (UID241)	930	213	118	43	0	5	205	2	1	0	0	95.76	2.12	20	k__Bacteria;p__Firmicutes	p__Firmicutes
94450.MaxBin.out.017	10	142	2	42.34	0.0111997	2204904	36.4	o__Clostridiales (UID1120)	304	250	143	42	0	8	241	1	0	0	0	96.08	0.7	0	k__Bacteria;p__Firmicutes;c__Clostridia;o__Clostridiales	o__Clostridiales
94450.MaxBin.out.018	10	142	2	38.82	0.0102686	2792862	42.4	o__Clostridiales (UID1120)	304	250	143	42	1	6	235	9	0	0	0	96.15	5.24	0	k__Bacteria;p__Firmicutes;c__Clostridia;o__Clostridiales;f__Peptostreptococcaceae_3;g__Clostridium_3	g__Clostridium_3
94450.MaxBin.out.019	10	142	2	38.47	0.010176	1413338	50	p__Euryarchaeota (UID3)	148	188	125	30	2	48	128	12	0	0	0	75.69	7.38	100	k__Archaea;p__Euryarchaeota;c__Methanobacteria;o__Methanobacteriales;f__Methanobacteriaceae;g__Methanothermobacter	g__Methanothermobacter
94450.MaxBin.out.020	10	142	2	30.61	0.0080969	2911538	43.3	o__Clostridiales (UID1120)	304	250	143	42	1	6	238	6	0	0	0	95.8	2.45	0	k__Bacteria;p__Firmicutes;c__Clostridia;o__Clostridiales;f__Peptostreptococcaceae_3;g__Clostridium_3	g__Clostridium_3
94450.MaxBin.out.021	10	142	2	25.19	0.00666321	2574137	43.3	p__Firmicutes (UID241)	930	213	118	43	0	10	195	7	1	0	0	96.61	5.51	0	k__Bacteria;p__Firmicutes	p__Firmicutes
94450.MaxBin.out.022	10	142	2	22.88	0.00605217	2083525	54.4	o__Clostridiales (UID1212)	172	263	149	42	0	4	259	0	0	0	0	97.99	0	0	k__Bacteria;p__Firmicutes;c__Clostridia;o__Clostridiales	o__Clostridiales
94450.MaxBin.out.023	10	142	2	21.23	0.00561572	2089845	50.2	o__Clostridiales (UID1212)	172	263	149	42	0	10	253	0	0	0	0	95.08	0	0	k__Bacteria;p__Firmicutes;c__Clostridia;o__Clostridiales	o__Clostridiales
94450.MaxBin.out.024	10	142	2	16.12	0.00426403	3556901	37.6	o__Clostridiales (UID1120)	304	250	143	10	2	57	123	67	3	0	0	92.31	36.01	7.89	k__Bacteria;p__Firmicutes;c__Clostridia;o__Clostridiales	o__Clostridiales
94450.MaxBin.out.025	10	142	2	16.12	0.00426403	2988117	37.3	k__Bacteria (UID203)	5449	103	57	20	19	15	59	28	1	0	0	75.44	10.53	48.39	k__Bacteria;p__Firmicutes;c__Clostridia;o__Clostridiales;f__Peptostreptococcaceae_3;g__Clostridium_3	g__Clostridium_3
94450.MaxBin.out.026	10	142	2	15.55	0.00411326	2483096	47.7	c__Clostridia (UID1118)	387	223	124	42	1	5	215	3	0	0	0	97.35	1.69	33.33	k__Bacteria;p__Firmicutes;c__Clostridia;o__Thermoanaerobacterales	o__Thermoanaerobacterales
94450.MaxBin.out.027	10	142	2	14.25	0.00376938	3375674	41.6	k__Bacteria (UID203)	5449	103	57	28	15	1	83	19	0	0	0	98.25	8.77	15.79	k__Bacteria;p__Firmicutes;c__Clostridia;o__Clostridiales;f__Peptostreptococcaceae_3;g__Clostridium_3	g__Clostridium_3
94450.MaxBin.out.028	10	142	2	14.25	0.00376938	3123896	41.1	o__Clostridiales (UID1120)	304	250	143	40	0	55	187	7	0	1	0	70.16	5.24	0	k__Bacteria;p__Firmicutes;c__Clostridia;o__Clostridiales;f__Peptostreptococcaceae_3;g__Clostridium_3	g__Clostridium_3
94450.MaxBin.out.029	10	142	2	14.18	0.00375087	1599121	50.7	k__Bacteria (UID2328)	3167	126	75	43	0	2	124	0	0	0	0	97.33	0	0	k__Bacteria;p__Tenericutes;c__Mollicutes	c__Mollicutes
94450.MaxBin.out.030	10	142	2	13.87	0.00366887	2762445	57.9	p__Firmicutes (UID239)	1324	175	101	38	5	12	140	23	0	0	0	89.6	12.71	0	k__Bacteria;p__Firmicutes;c__Clostridia_3;o__Clostridiales_3	o__Clostridiales_3
94450.MaxBin.out.031	10	142	2	13.38	0.00353925	2240328	40.7	c__Clostridia (UID1118)	387	223	124	43	0	3	219	1	0	0	0	97.98	0.4	0	k__Bacteria;p__Firmicutes;c__Clostridia;o__Thermoanaerobacterales	o__Thermoanaerobacterales
94450.MaxBin.out.032	10	142	2	12.43	0.00328796	3099868	44	o__Clostridiales (UID1212)	172	263	149	43	0	19	237	7	0	0	0	89.93	2.85	0	k__Bacteria;p__Firmicutes;c__Clostridia;o__Clostridiales;f__Peptostreptococcaceae_3;g__Clostridium_3	g__Clostridium_3
94450.MaxBin.out.033	10	142	2	12.08	0.00319538	5128512	63	k__Bacteria (UID3187)	2258	184	114	36	7	2	159	23	0	0	0	98.25	12.79	0	k__Bacteria;p__Acidobacteria;c__Acidobacteriia;o__Acidobacteriales	o__Acidobacteriales
94450.MaxBin.out.034	10	142	2	12.01	0.00317686	2017433	47.7	k__Bacteria (UID209)	5443	105	59	41	1	2	102	1	0	0	0	98.15	1.69	100	k__Bacteria;p__Synergistetes;c__Synergistia;o__Synergistales;f__Synergistaceae	f__Synergistaceae
94450.MaxBin.out.035	10	142	2	11.53	0.00304989	2120273	41	o__Clostridiales (UID1212)	172	263	149	42	0	2	256	5	0	0	0	98.66	3.02	0	k__Bacteria;p__Firmicutes;c__Clostridia;o__Clostridiales	o__Clostridiales
94450.MaxBin.out.036	10	142	2	11.27	0.00298112	4685300	33.1	k__Bacteria (UID3187)	2258	180	109	17	7	45	91	33	3	6	2	83.38	47.04	0	k__Bacteria;p__Nitrospirae;c__Nitrospira;o__Nitrospirales;f__Nitrospiraceae;g__Thermodesulfovibrio	g__Thermodesulfovibrio
94450.MaxBin.out.037	10	142	2	10.46	0.00276686	3108338	39.9	k__Archaea (UID2)	207	149	107	21	22	2	107	36	3	1	0	98.13	26.98	0	k__Archaea;p__Euryarchaeota;c__Methanobacteria;o__Methanobacteriales;f__Methanobacteriaceae;g__Methanobacterium	g__Methanobacterium
94450.MaxBin.out.038	10	142	2	9.34	0.0024706	2208548	60.8	o__Clostridiales (UID1212)	172	263	149	42	1	6	230	23	4	0	0	97.65	11.19	14.29	k__Bacteria;p__Firmicutes;c__Clostridia;o__Clostridiales	o__Clostridiales
94450.MaxBin.out.039	10	142	2	8.82	0.00233305	4131128	64.6	k__Bacteria (UID1452)	924	163	110	41	0	15	143	5	0	0	0	90.37	3.82	40	k__Bacteria;p__Chloroflexi	p__Chloroflexi
94450.MaxBin.out.040	10	142	2	8.03	0.00212408	2761530	57.5	k__Bacteria (UID1452)	924	163	110	30	1	57	93	11	2	0	0	55.76	7.12	0	k__Bacteria;p__Chloroflexi	p__Chloroflexi
94450.MaxBin.out.041	10	142	2	7.97	0.00210821	2906601	47.9	o__Clostridiales (UID1212)	172	263	149	13	1	154	88	20	1	0	0	45.83	11.24	0	k__Bacteria;p__Firmicutes;c__Clostridia;o__Clostridiales	o__Clostridiales
94450.MaxBin.out.042	10	142	2	7.78	0.00205795	1687737	47.6	o__Clostridiales (UID1212)	172	263	149	40	0	39	221	3	0	0	0	79.75	1.17	0	k__Bacteria;p__Firmicutes;c__Clostridia;o__Clostridiales;f__Ruminococcaceae	f__Ruminococcaceae
94450.MaxBin.out.043	10	142	2	7.36	0.00194685	3074197	51.8	k__Bacteria (UID203)	5449	104	58	12	31	1	43	33	10	17	0	99.14	70.03	11.52	k__Bacteria;p__Firmicutes;c__Clostridia;o__Clostridiales	o__Clostridiales
94450.MaxBin.out.044	10	142	2	7.07	0.00187014	2790707	48.6	c__Clostridia (UID1085)	35	420	196	25	7	62	299	52	7	0	0	83.5	16.07	2.74	k__Bacteria;p__Firmicutes;c__Clostridia;o__Clostridiales_4;f__Syntrophomonadaceae	f__Syntrophomonadaceae
94450.MaxBin.out.045	10	142	2	7.03	0.00185956	3395686	42.7	k__Bacteria (UID203)	5449	103	58	21	11	27	50	23	3	0	0	66.61	23.39	3.12	k__Bacteria;p__Firmicutes;c__Clostridia;o__Clostridiales_2;f__Peptococcaceae	f__Peptococcaceae
94450.MaxBin.out.046	10	142	2	6.99	0.00184898	4127291	37.1	o__Clostridiales (UID1212)	172	263	149	22	3	73	122	61	7	0	0	75.49	32.38	2.44	k__Bacteria;p__Firmicutes;c__Clostridia;o__Clostridiales;f__Peptostreptococcaceae_3;g__Clostridium_3	g__Clostridium_3
94450.MaxBin.out.047	10	142	2	6.91	0.00182782	1931114	62.3	k__Bacteria (UID203)	5449	104	58	3	0	86	17	1	0	0	0	23.04	1.72	0	k__Bacteria;p__Chloroflexi	p__Chloroflexi
94450.MaxBin.out.048	10	142	2	6.63	0.00175375	1296829	53.7	o__Clostridiales (UID1212)	172	263	149	21	0	114	146	3	0	0	0	58.12	1.68	0	k__Bacteria;p__Firmicutes;c__Clostridia;o__Clostridiales	o__Clostridiales
94450.MaxBin.out.049	10	142	2	6.51	0.00172201	3163376	38.4	k__Bacteria (UID203)	5449	103	57	21	12	26	56	11	9	1	0	74.18	27.35	4.55	k__Bacteria;p__Nitrospirae;c__Nitrospira;o__Nitrospirales;f__Nitrospiraceae	f__Nitrospiraceae
94456.MaxBin.out.001	10	142	3	543.13	0.162595	4489544	35	k__Bacteria (UID203)	5449	104	58	32	11	3	72	29	0	0	0	96.39	26.55	0	k__Bacteria;p__Firmicutes;c__Clostridia;o__Clostridiales;f__Peptostreptococcaceae_3;g__Clostridium_3;s__Clostridium_clariflavum	s__Clostridium_clariflavum
94456.MaxBin.out.002	10	142	3	436.13	0.130563	712610	33.1	k__Bacteria (UID203)	5449	104	58	1	0	101	3	0	0	0	0	5.17	0	0	k__Bacteria;p__Firmicutes;c__Clostridia;o__Clostridiales;f__Peptostreptococcaceae_3;g__Clostridium_3	g__Clostridium_3
94456.MaxBin.out.003	10	142	3	290.3	0.086906	2818422	51.6	o__Clostridiales (UID1120)	304	250	143	36	5	26	184	40	0	0	0	86.85	18.46	5	k__Bacteria;p__Firmicutes;c__Clostridia;o__Clostridiales;f__Peptostreptococcaceae_3;g__Clostridium_3	g__Clostridium_3
94456.MaxBin.out.004	10	142	3	258.07	0.0772574	1148516	44.3	k__Bacteria (UID203)	5449	102	56	31	0	24	77	1	0	0	0	78.73	0.36	0	k__Bacteria	k__Bacteria
94456.MaxBin.out.005	10	142	3	238.47	0.0713899	2481938	47.2	o__Clostridiales (UID1120)	304	250	143	36	4	22	196	30	2	0	0	89.39	15.94	2.78	k__Bacteria;p__Firmicutes;c__Clostridia;o__Clostridiales;f__Peptostreptococcaceae_3;g__Clostridium_3	g__Clostridium_3
94456.MaxBin.out.006	10	142	3	208.45	0.0624029	523237	48	k__Bacteria (UID209)	5443	105	59	23	0	58	47	0	0	0	0	30.82	0	0	k__Bacteria;p__Synergistetes;c__Synergistia;o__Synergistales;f__Synergistaceae	f__Synergistaceae
94456.MaxBin.out.007	10	142	3	182.82	0.0547301	457058	33.4	k__Bacteria (UID203)	5449	102	57	2	0	95	7	0	0	0	0	8.19	0	0	k__Bacteria;p__Thermotogae;c__Thermotogae;o__Thermotogales;f__Thermotogaceae	f__Thermotogaceae
94456.MaxBin.out.008	10	142	3	158.21	0.0473627	1597037	45.2	o__Clostridiales (UID1212)	172	263	149	37	1	58	203	2	0	0	0	72.36	0.16	50	k__Bacteria;p__Firmicutes;c__Clostridia;o__Clostridiales	o__Clostridiales
94456.MaxBin.out.009	10	142	3	148.68	0.0445098	4104386	50.2	k__Bacteria (UID203)	5449	103	57	28	15	0	65	37	1	0	0	100	42.4	10	k__Bacteria;p__Firmicutes;c__Clostridia;o__Clostridiales;f__Peptostreptococcaceae_3;g__Clostridium_3	g__Clostridium_3
94456.MaxBin.out.010	10	142	3	100.43	0.0300654	2654059	33.8	o__Clostridiales (UID1212)	172	263	149	43	0	3	253	7	0	0	0	97.99	2.57	0	k__Bacteria;p__Firmicutes;c__Clostridia;o__Clostridiales	o__Clostridiales
94456.MaxBin.out.011	10	142	3	73.43	0.0219825	1717259	49.5	p__Euryarchaeota (UID3)	148	188	125	41	2	0	185	3	0	0	0	100	0.18	0	k__Archaea;p__Euryarchaeota;c__Methanobacteria;o__Methanobacteriales;f__Methanobacteriaceae;g__Methanothermobacter	g__Methanothermobacter
94456.MaxBin.out.012	10	142	3	60.37	0.0180727	3237870	43.5	o__Clostridiales (UID1120)	304	250	143	43	0	6	230	11	3	0	0	95.8	5.77	0	k__Bacteria;p__Firmicutes;c__Clostridia;o__Clostridiales;f__Peptostreptococcaceae_3;g__Clostridium_3	g__Clostridium_3
94456.MaxBin.out.013	10	142	3	51.6	0.0154473	4170922	38	o__Clostridiales (UID1212)	172	263	149	43	0	1	257	5	0	0	0	99.33	2.24	0	k__Bacteria;p__Firmicutes;c__Clostridia;o__Clostridiales;f__Peptostreptococcaceae_3;g__Clostridium_3	g__Clostridium_3
94456.MaxBin.out.014	10	142	3	49.23	0.0147378	2584373	53	p__Firmicutes (UID239)	1324	176	102	43	0	5	169	2	0	0	0	95.1	1.47	0	k__Bacteria;p__Firmicutes	p__Firmicutes
94456.MaxBin.out.015	10	142	3	46.35	0.0138756	2423978	49.3	p__Firmicutes (UID241)	930	213	118	43	0	5	205	3	0	0	0	95.76	1.69	0	k__Bacteria;p__Firmicutes	p__Firmicutes
94456.MaxBin.out.016	10	142	3	41.05	0.012289	2360956	43.2	p__Firmicutes (UID241)	930	213	118	42	1	11	193	8	1	0	0	95.76	5.54	9.09	k__Bacteria;p__Firmicutes	p__Firmicutes
94456.MaxBin.out.017	10	142	3	39.68	0.0118789	2153789	33.2	c__Bacilli (UID285)	586	325	181	43	0	38	272	14	1	0	0	85.29	6.72	29.41	k__Bacteria;p__Firmicutes;c__Bacilli	c__Bacilli
94456.MaxBin.out.018	10	142	3	37.87	0.011337	2368855	44.9	o__Clostridiales (UID1212)	172	263	149	29	0	32	228	3	0	0	0	93.57	1.34	0	k__Bacteria;p__Firmicutes;c__Clostridia;o__Clostridiales	o__Clostridiales
94456.MaxBin.out.019	10	142	3	34.44	0.0103102	2895259	41.7	k__Bacteria (UID203)	5449	103	57	28	14	7	79	17	0	0	0	93.33	5.9	35.29	k__Bacteria;p__Firmicutes;c__Clostridia;o__Clostridiales	o__Clostridiales
94456.MaxBin.out.020	10	142	3	25.39	0.00760091	2004751	50.3	o__Clostridiales (UID1212)	172	263	149	42	0	9	254	0	0	0	0	95.75	0	0	k__Bacteria;p__Firmicutes;c__Clostridia;o__Clostridiales	o__Clostridiales
94456.MaxBin.out.021	10	142	3	23.87	0.00714587	2410905	36.5	o__Clostridiales (UID1120)	304	250	143	43	0	8	241	1	0	0	0	96.45	0.7	0	k__Bacteria;p__Firmicutes;c__Clostridia;o__Clostridiales	o__Clostridiales
94456.MaxBin.out.022	10	142	3	23.42	0.00701116	2344230	47.7	k__Bacteria (UID209)	5443	105	59	42	1	0	104	1	0	0	0	100	0.15	100	k__Bacteria;p__Synergistetes;c__Synergistia;o__Synergistales;f__Synergistaceae	f__Synergistaceae
94456.MaxBin.out.023	10	142	3	21.04	0.00629867	2140638	54.4	o__Clostridiales (UID1212)	172	263	149	43	0	4	259	0	0	0	0	97.65	0	0	k__Bacteria;p__Firmicutes;c__Clostridia;o__Clostridiales	o__Clostridiales
94456.MaxBin.out.024	10	142	3	19.84	0.00593943	1981131	48	c__Clostridia (UID1118)	387	223	124	43	0	8	213	2	0	0	0	95.54	1.21	50	k__Bacteria;p__Firmicutes;c__Clostridia;o__Thermoanaerobacterales	o__Thermoanaerobacterales
94456.MaxBin.out.025	10	142	3	19.23	0.00575681	1897492	43.6	o__Clostridiales (UID1120)	304	250	143	30	10	78	136	27	9	0	0	64.34	16.04	29.63	k__Bacteria;p__Firmicutes;c__Clostridia;o__Clostridiales;f__Peptostreptococcaceae_3;g__Clostridium_3	g__Clostridium_3
94456.MaxBin.out.026	10	142	3	19.2	0.00574783	409201	40.9	k__Bacteria (UID203)	5449	103	57	2	0	99	4	0	0	0	0	3.83	0	0	k__Bacteria;p__Firmicutes;c__Clostridia;o__Clostridiales;f__Peptostreptococcaceae_3;g__Clostridium_3	g__Clostridium_3
94456.MaxBin.out.027	10	142	3	17.2	0.0051491	4365138	32.9	k__Bacteria (UID3187)	2258	180	109	40	2	1	157	13	6	2	1	99.95	25.23	0	k__Bacteria;p__Nitrospirae;c__Nitrospira;o__Nitrospirales;f__Nitrospiraceae;g__Thermodesulfovibrio	g__Thermodesulfovibrio
94456.MaxBin.out.028	10	142	3	16.72	0.0050054	3851693	65.2	k__Bacteria (UID1452)	924	163	110	36	0	18	142	3	0	0	0	90.41	2.27	33.33	k__Bacteria;p__Chloroflexi	p__Chloroflexi
94456.MaxBin.out.029	10	142	3	16.71	0.00500241	2248382	66.3	f__Rhodocyclaceae (UID3972)	30	540	241	43	0	13	526	1	0	0	0	96.13	0.21	0	k__Bacteria;p__Proteobacteria;c__Betaproteobacteria;o__Rhodocyclales;f__Rhodocyclaceae	f__Rhodocyclaceae
94456.MaxBin.out.030	10	142	3	16.6	0.00496948	2294355	40.8	c__Clostridia (UID1118)	387	223	124	43	0	3	219	1	0	0	0	97.98	0.4	0	k__Bacteria;p__Firmicutes;c__Clostridia;o__Thermoanaerobacterales	o__Thermoanaerobacterales
94456.MaxBin.out.031	10	142	3	11.51	0.00344571	4871026	43.9	o__Clostridiales (UID1212)	172	263	149	41	2	4	217	39	3	0	0	97.32	20.11	0	k__Bacteria;p__Firmicutes;c__Clostridia;o__Clostridiales;f__Peptostreptococcaceae_3;g__Clostridium_3	g__Clostridium_3
94456.MaxBin.out.032	10	142	3	10.49	0.00314035	2073388	39.9	k__Bacteria (UID209)	5443	105	59	42	0	2	101	2	0	0	0	96.61	1.85	100	k__Bacteria	k__Bacteria
94456.MaxBin.out.033	10	142	3	9.64	0.00288589	5293379	59.8	k__Bacteria (UID1452)	924	163	110	41	0	10	145	6	2	0	0	92.73	6.39	0	k__Bacteria;p__Chloroflexi	p__Chloroflexi
94456.MaxBin.out.034	10	142	3	8.76	0.00262245	3234962	41.3	p__Euryarchaeota (UID49)	95	228	153	24	2	33	187	8	0	0	0	96.46	4.58	12.5	k__Archaea;p__Euryarchaeota;c__Methanomicrobia;o__Methanosarcinales;f__Methanosarcinaceae	f__Methanosarcinaceae
94456.MaxBin.out.035	10	142	3	8.72	0.00261047	1992495	47.6	o__Clostridiales (UID1212)	172	263	149	38	0	17	243	3	0	0	0	93.37	1.01	0	k__Bacteria;p__Firmicutes;c__Clostridia;o__Clostridiales;f__Ruminococcaceae	f__Ruminococcaceae
94456.MaxBin.out.036	10	142	3	8.7	0.00260449	4111635	37.4	o__Clostridiales (UID1212)	172	263	149	37	6	15	176	69	3	0	0	94.97	30.39	2.56	k__Bacteria;p__Firmicutes;c__Clostridia;o__Clostridiales	o__Clostridiales
94456.MaxBin.out.037	10	142	3	8.64	0.00258652	2017594	41.1	o__Clostridiales (UID1212)	172	263	149	42	0	2	257	4	0	0	0	98.66	1.45	25	k__Bacteria;p__Firmicutes;c__Clostridia;o__Clostridiales	o__Clostridiales
94456.MaxBin.out.038	10	142	3	8.41	0.00251767	4593932	63.1	k__Bacteria (UID3187)	2258	184	114	36	1	16	164	4	0	0	0	91.59	2.68	0	k__Bacteria;p__Acidobacteria;c__Acidobacteriia;o__Acidobacteriales	o__Acidobacteriales
94456.MaxBin.out.039	10	142	3	8.08	0.00241888	1870136	60.6	o__Clostridiales (UID1212)	172	263	149	36	0	37	219	6	1	0	0	83.31	3.13	22.22	k__Bacteria;p__Firmicutes;c__Clostridia;o__Clostridiales	o__Clostridiales
94456.MaxBin.out.040	10	142	3	7.69	0.00230213	3409862	64.4	k__Bacteria (UID1452)	924	163	110	34	0	40	121	2	0	0	0	72.83	1.82	50	k__Bacteria;p__Chloroflexi	p__Chloroflexi
94456.MaxBin.out.041	10	142	3	7.12	0.00213149	1735700	53.5	o__Clostridiales (UID1120)	304	250	143	24	2	92	151	7	0	0	0	60.13	2.53	14.29	k__Bacteria;p__Firmicutes;c__Clostridia;o__Clostridiales;f__Peptostreptococcaceae_3;g__Clostridium_3	g__Clostridium_3
94456.MaxBin.out.042	10	142	3	6.66	0.00199378	2766195	47.9	k__Bacteria (UID203)	5449	104	58	18	17	28	53	23	0	0	0	70.45	9.56	0	k__Bacteria;p__Firmicutes;c__Clostridia;o__Clostridiales_4;f__Syntrophomonadaceae	f__Syntrophomonadaceae
94456.MaxBin.out.043	10	142	3	6.23	0.00186505	2369899	50.7	k__Bacteria (UID203)	5449	104	58	20	21	10	58	27	9	0	0	84.33	24.84	5.56	k__Bacteria;p__Firmicutes;c__Clostridia;o__Clostridiales	o__Clostridiales
94456.MaxBin.out.044	10	142	3	6.02	0.00180218	1789608	53.3	k__Bacteria (UID203)	5449	104	58	17	11	36	45	23	0	0	0	64.34	17.72	0	k__Bacteria;p__Firmicutes;c__Negativicutes	c__Negativicutes
94456.MaxBin.out.045	10	142	3	5.79	0.00173333	923643	53.4	o__Clostridiales (UID1212)	172	263	149	10	0	158	104	1	0	0	0	43.66	0.67	0	k__Bacteria;p__Firmicutes;c__Clostridia;o__Clostridiales	o__Clostridiales
94445.MaxBin.out.001	20	212	1	972.15	0.241741	236022	30.5	root (UID1)	5656	56	24	0	0	54	2	0	0	0	0	8.33	0	0	NA	NA
94445.MaxBin.out.002	20	212	1	413.73	0.102881	1603230	48.5	k__Bacteria (UID203)	5449	103	57	6	2	64	35	4	0	0	0	49.44	3.33	0	k__Bacteria;p__Proteobacteria;c__Alphaproteobacteria;o__Rickettsiales	o__Rickettsiales
94445.MaxBin.out.003	20	212	1	248.96	0.0619079	803700	44.6	k__Bacteria (UID203)	5449	102	56	28	0	32	70	0	0	0	0	66.83	0	0	k__Bacteria	k__Bacteria
94445.MaxBin.out.004	20	212	1	238.35	0.0592695	2357728	46.8	o__Clostridiales (UID1120)	304	250	143	27	5	60	168	20	2	0	0	75.37	10.09	3.85	k__Bacteria;p__Firmicutes;c__Clostridia;o__Clostridiales;f__Peptostreptococcaceae_3;g__Clostridium_3	g__Clostridium_3
94445.MaxBin.out.005	20	212	1	218.1	0.054234	2763806	50.7	k__Bacteria (UID203)	5449	103	57	28	15	5	65	19	10	4	0	91.23	35.14	34.25	k__Bacteria;p__Firmicutes;c__Clostridia;o__Clostridiales;f__Peptostreptococcaceae_3;g__Clostridium_3	g__Clostridium_3
94445.MaxBin.out.006	20	212	1	195.82	0.0486938	3981645	35.9	o__Clostridiales (UID1212)	172	262	148	41	0	30	231	1	0	0	0	87.16	0.68	0	k__Bacteria;p__Firmicutes;c__Clostridia;o__Clostridiales;f__Peptostreptococcaceae_3;g__Clostridium_3;s__Clostridium_clariflavum	s__Clostridium_clariflavum
94445.MaxBin.out.007	20	212	1	186.96	0.0464906	1728846	45.6	o__Clostridiales (UID1212)	172	263	149	40	0	25	236	2	0	0	0	88.74	0.3	50	k__Bacteria;p__Firmicutes;c__Clostridia;o__Clostridiales	o__Clostridiales
94445.MaxBin.out.008	20	212	1	185.2	0.0460529	3147197	33.4	o__Clostridiales (UID1212)	172	263	149	41	2	3	225	35	0	0	0	97.99	14.65	0	k__Bacteria;p__Firmicutes;c__Clostridia;o__Clostridiales	o__Clostridiales
94445.MaxBin.out.009	20	212	1	138.24	0.0343756	2864365	43.5	o__Clostridiales (UID1120)	304	250	143	41	2	12	232	6	0	0	0	94.41	2.47	16.67	k__Bacteria;p__Firmicutes;c__Clostridia;o__Clostridiales;f__Peptostreptococcaceae_3;g__Clostridium_3	g__Clostridium_3
94445.MaxBin.out.010	20	212	1	126.89	0.0315532	2528518	52.1	o__Clostridiales (UID1120)	304	250	143	41	0	16	228	5	1	0	0	91.96	3.15	0	k__Bacteria;p__Firmicutes;c__Clostridia;o__Clostridiales;f__Peptostreptococcaceae_3;g__Clostridium_3	g__Clostridium_3
94445.MaxBin.out.011	20	212	1	94.92	0.0236034	3665890	43	o__Clostridiales (UID1120)	304	250	143	41	2	3	234	4	9	0	0	97.9	8.51	16.13	k__Bacteria;p__Firmicutes;c__Clostridia;o__Clostridiales;f__Peptostreptococcaceae_3;g__Clostridium_3	g__Clostridium_3
94445.MaxBin.out.012	20	212	1	80.9	0.0201171	2399165	53	p__Firmicutes (UID239)	1324	176	102	43	0	5	168	3	0	0	0	95.1	2.45	0	k__Bacteria;p__Firmicutes	p__Firmicutes
94445.MaxBin.out.013	20	212	1	72.11	0.0179313	4535860	51.4	k__Bacteria (UID203)	5449	104	58	1	42	2	40	57	5	0	0	96.55	42.92	0	k__Bacteria;p__Firmicutes;c__Clostridia;o__Clostridiales;f__Peptostreptococcaceae_3;g__Clostridium_3	g__Clostridium_3
94445.MaxBin.out.014	20	212	1	69.8	0.0173569	2685802	33.2	c__Bacilli (UID285)	586	325	181	43	0	34	272	17	2	0	0	85.97	6.68	0	k__Bacteria;p__Firmicutes;c__Bacilli	c__Bacilli
94445.MaxBin.out.015	20	212	1	45.8	0.0113889	4490448	59.8	k__Bacteria (UID1452)	924	163	110	35	0	24	133	5	1	0	0	86.24	5.15	0	k__Bacteria;p__Chloroflexi	p__Chloroflexi
94445.MaxBin.out.016	20	212	1	42.54	0.0105782	2789510	45.4	o__Clostridiales (UID1212)	172	263	149	43	0	5	243	15	0	0	0	97.93	4.03	0	k__Bacteria;p__Firmicutes;c__Clostridia;o__Clostridiales	o__Clostridiales
94445.MaxBin.out.017	20	212	1	42.2	0.0104937	6046467	38.7	root (UID1)	5656	56	24	0	43	0	0	56	0	0	0	100	100	0	NA	NA
94445.MaxBin.out.018	20	212	1	41.71	0.0103719	2552913	41.6	o__Clostridiales (UID1212)	172	263	149	40	0	33	230	0	0	0	0	83.92	0	0	k__Bacteria;p__Firmicutes;c__Clostridia;o__Clostridiales	o__Clostridiales
94445.MaxBin.out.019	20	212	1	38.81	0.00965072	3764669	65.3	k__Bacteria (UID1452)	924	163	110	34	2	25	133	5	0	0	0	85.69	2.12	0	k__Bacteria;p__Chloroflexi	p__Chloroflexi
94445.MaxBin.out.020	20	212	1	36.29	0.00902409	2041080	34.2	k__Bacteria (UID3187)	2258	180	109	40	3	0	164	15	1	0	0	100	9.84	0	k__Bacteria;p__Nitrospirae;c__Nitrospira;o__Nitrospirales;f__Nitrospiraceae;g__Thermodesulfovibrio	g__Thermodesulfovibrio
94445.MaxBin.out.021	20	212	1	33.78	0.00839993	2428996	57.8	p__Firmicutes (UID239)	1324	175	101	43	0	11	163	1	0	0	0	90.59	0.99	0	k__Bacteria;p__Firmicutes;c__Clostridia_3;o__Clostridiales_3	o__Clostridiales_3
94445.MaxBin.out.022	20	212	1	32.93	0.00818857	1239504	29.3	root (UID1)	5656	56	24	0	0	54	2	0	0	0	0	8.33	0	0	NA	NA
94445.MaxBin.out.023	20	212	1	30.81	0.0076614	2494108	57.7	p__Firmicutes (UID239)	1324	176	102	43	0	3	169	4	0	0	0	97.06	2.94	0	k__Bacteria;p__Firmicutes	p__Firmicutes
94445.MaxBin.out.024	20	212	1	30.51	0.0075868	2081022	50.2	o__Clostridiales (UID1212)	172	263	149	42	0	9	253	1	0	0	0	95.41	0.34	100	k__Bacteria;p__Firmicutes;c__Clostridia;o__Clostridiales	o__Clostridiales
94445.MaxBin.out.025	20	212	1	26.53	0.00659711	2661272	48.9	p__Firmicutes (UID241)	930	213	118	43	0	4	206	3	0	0	0	96.61	1.69	0	k__Bacteria;p__Firmicutes	p__Firmicutes
94445.MaxBin.out.026	20	212	1	24.21	0.0060202	2106029	54.4	o__Clostridiales (UID1212)	172	263	149	43	0	3	258	2	0	0	0	98.32	1.01	50	k__Bacteria;p__Firmicutes;c__Clostridia;o__Clostridiales	o__Clostridiales
94445.MaxBin.out.027	20	212	1	21.65	0.00538362	2441003	36.4	o__Clostridiales (UID1120)	304	250	143	43	0	5	243	2	0	0	0	97.2	1.4	0	k__Bacteria;p__Firmicutes;c__Clostridia;o__Clostridiales	o__Clostridiales
94445.MaxBin.out.028	20	212	1	20.8	0.00517225	1706595	39.8	k__Bacteria (UID209)	5443	105	59	42	0	5	99	1	0	0	0	91.53	1.69	100	k__Bacteria	k__Bacteria
94445.MaxBin.out.029	20	212	1	20.35	0.00506035	3612339	64.6	k__Bacteria (UID1452)	924	163	110	42	0	23	137	3	0	0	0	82.73	2	66.67	k__Bacteria;p__Chloroflexi	p__Chloroflexi
94445.MaxBin.out.030	20	212	1	19.37	0.00481666	3204064	67.7	f__Rhodocyclaceae (UID3972)	30	540	241	40	3	13	433	91	3	0	0	96.13	16.18	0	k__Bacteria;p__Proteobacteria;c__Betaproteobacteria;o__Rhodocyclales;f__Rhodocyclaceae	f__Rhodocyclaceae
94445.MaxBin.out.031	20	212	1	18.4	0.00457545	5060779	63.1	k__Bacteria (UID3187)	2258	184	114	43	0	2	180	2	0	0	0	98.25	1.75	0	k__Bacteria;p__Acidobacteria;c__Acidobacteriia;o__Acidobacteriales	o__Acidobacteriales
94445.MaxBin.out.032	20	212	1	18.05	0.00448842	3784509	41.6	o__Clostridiales (UID1120)	304	250	143	40	3	13	225	12	0	0	0	94.06	4.9	8.33	k__Bacteria;p__Firmicutes;c__Clostridia;o__Clostridiales;f__Peptostreptococcaceae_3;g__Clostridium_3	g__Clostridium_3
94445.MaxBin.out.033	20	212	1	15.26	0.00379464	2227194	43.1	p__Firmicutes (UID241)	930	213	118	43	0	10	200	3	0	0	0	96.61	2.12	0	k__Bacteria;p__Firmicutes	p__Firmicutes
94445.MaxBin.out.034	20	212	1	14.57	0.00362306	3117022	41.3	p__Euryarchaeota (UID49)	95	228	153	43	0	1	223	4	0	0	0	99.84	2.61	25	k__Archaea;p__Euryarchaeota;c__Methanomicrobia;o__Methanosarcinales;f__Methanosarcinaceae	f__Methanosarcinaceae
94445.MaxBin.out.035	20	212	1	13.54	0.00336694	2103513	60.7	o__Clostridiales (UID1212)	172	263	149	42	1	8	253	2	0	0	0	95.64	1.01	50	k__Bacteria;p__Firmicutes;c__Clostridia;o__Clostridiales	o__Clostridiales
94445.MaxBin.out.036	20	212	1	11.8	0.00293426	2068143	41.1	o__Clostridiales (UID1212)	172	263	149	41	1	3	258	2	0	0	0	97.99	0.4	0	k__Bacteria;p__Firmicutes;c__Clostridia;o__Clostridiales	o__Clostridiales
94445.MaxBin.out.037	20	212	1	11.51	0.00286214	2838456	52.4	p__Firmicutes (UID239)	1324	176	102	43	0	10	165	1	0	0	0	91.67	0.98	0	k__Bacteria;p__Firmicutes	p__Firmicutes
94445.MaxBin.out.038	20	212	1	11.45	0.00284722	5462766	35.7	k__Bacteria (UID203)	5449	103	57	14	22	14	45	30	13	1	0	93.78	55.82	5.33	k__Bacteria;p__Firmicutes;c__Clostridia;o__Clostridiales;f__Peptostreptococcaceae_3;g__Clostridium_3	g__Clostridium_3
94445.MaxBin.out.039	20	212	1	11.43	0.00284225	2655567	48.4	c__Clostridia (UID1085)	35	420	196	43	0	9	402	9	0	0	0	95.83	2.85	0	k__Bacteria;p__Firmicutes;c__Clostridia;o__Clostridiales_4;f__Syntrophomonadaceae	f__Syntrophomonadaceae
94445.MaxBin.out.040	20	212	1	11.24	0.002795	2025668	47.6	o__Clostridiales (UID1212)	172	263	149	43	0	8	251	4	0	0	0	95.41	1.68	0	k__Bacteria;p__Firmicutes;c__Clostridia;o__Clostridiales;f__Ruminococcaceae	f__Ruminococcaceae
94445.MaxBin.out.041	20	212	1	11.08	0.00275522	1959334	47.8	k__Bacteria (UID209)	5443	105	59	38	0	7	97	1	0	0	0	94.3	1.69	0	k__Bacteria;p__Synergistetes;c__Synergistia;o__Synergistales;f__Synergistaceae	f__Synergistaceae
94445.MaxBin.out.042	20	212	1	10.88	0.00270549	1453221	50.8	k__Bacteria (UID2328)	3167	126	75	43	0	4	122	0	0	0	0	94.67	0	0	k__Bacteria;p__Tenericutes;c__Mollicutes	c__Mollicutes
94445.MaxBin.out.043	20	212	1	10.4	0.00258613	4187781	58.9	k__Bacteria (UID203)	5449	104	58	23	20	0	56	39	4	5	0	100	50.37	2.47	k__Bacteria;p__Firmicutes	p__Firmicutes
94445.MaxBin.out.044	20	212	1	9.59	0.00238471	3438609	48.7	o__Clostridiales (UID1212)	172	263	149	25	4	75	149	35	4	0	0	70.94	19.97	2.13	k__Bacteria;p__Firmicutes;c__Clostridia;o__Clostridiales	o__Clostridiales
94445.MaxBin.out.045	20	212	1	9.22	0.0022927	3371004	57.7	p__Firmicutes (UID239)	1324	176	102	41	1	12	162	2	0	0	0	91.08	0.98	0	k__Bacteria;p__Firmicutes	p__Firmicutes
94445.MaxBin.out.046	20	212	1	9.08	0.00225789	2910925	62.9	p__Firmicutes (UID239)	1324	176	102	37	5	16	149	10	1	0	0	85.78	4.44	23.08	k__Bacteria;p__Firmicutes	p__Firmicutes
94445.MaxBin.out.047	20	212	1	9.08	0.00225789	2099488	54	o__Clostridiales (UID1212)	172	263	149	40	1	18	238	7	0	0	0	91.12	3.36	0	k__Bacteria;p__Firmicutes;c__Clostridia;o__Clostridiales	o__Clostridiales
94445.MaxBin.out.048	20	212	1	8.73	0.00217085	3983726	44.2	o__Clostridiales (UID1212)	172	263	149	32	10	21	191	45	6	0	0	90.34	22.02	3.17	k__Bacteria;p__Firmicutes;c__Clostridia;o__Clostridiales;f__Peptostreptococcaceae_3;g__Clostridium_3	g__Clostridium_3
94445.MaxBin.out.049	20	212	1	8.17	0.0020316	3051894	41.8	c__Clostridia (UID1085)	35	420	196	25	6	68	242	98	12	0	0	85.69	30.69	2.24	k__Bacteria;p__Firmicutes;c__Clostridia;o__Clostridiales_2;f__Peptococcaceae	f__Peptococcaceae
94445.MaxBin.out.050	20	212	1	7.85	0.00195203	3279705	39	o__Clostridiales (UID1120)	304	250	143	16	7	111	87	40	10	0	2	53.62	22.38	30	k__Bacteria;p__Firmicutes;c__Clostridia;o__Clostridiales;f__Peptostreptococcaceae_3;g__Clostridium_3	g__Clostridium_3
94445.MaxBin.out.051	20	212	1	7.17	0.00178293	2170621	48	c__Clostridia (UID1118)	387	223	124	19	3	59	147	16	1	0	0	77.69	9.76	5.26	k__Bacteria;p__Firmicutes;c__Clostridia;o__Thermoanaerobacterales	o__Thermoanaerobacterales
94445.MaxBin.out.052	20	212	1	6.92	0.00172077	2194234	44	o__Clostridiales (UID1120)	304	250	143	27	0	77	167	4	2	0	0	73.19	3.73	0	k__Bacteria;p__Firmicutes;c__Clostridia;o__Clostridiales;f__Peptostreptococcaceae_3;g__Clostridium_3	g__Clostridium_3
94445.MaxBin.out.053	20	212	1	6.9	0.00171579	2817876	38.4	c__Clostridia (UID1118)	387	223	124	10	4	102	68	49	4	0	0	63.82	30.01	1.64	k__Bacteria;p__Firmicutes;c__Clostridia;o__Thermoanaerobacterales	o__Thermoanaerobacterales
94445.MaxBin.out.054	20	212	1	6.77	0.00168347	3279438	51.4	k__Bacteria (UID203)	5449	103	58	26	16	9	56	28	9	1	0	84.48	45.53	0	k__Bacteria;p__Firmicutes;c__Clostridia;o__Clostridiales	o__Clostridiales
94445.MaxBin.out.055	20	212	1	6.55	0.00162876	1814174	43.7	o__Clostridiales (UID1120)	304	250	143	32	4	91	146	12	1	0	0	59.27	5.48	20	k__Bacteria;p__Firmicutes;c__Clostridia;o__Clostridiales;f__Peptostreptococcaceae_3;g__Clostridium_3	g__Clostridium_3
94445.MaxBin.out.056	20	212	1	5.4	0.0013428	680107	53.5	k__Bacteria (UID203)	5449	104	58	9	0	83	20	1	0	0	0	21.63	1.72	0	k__Bacteria;p__Firmicutes;c__Clostridia;o__Clostridiales	o__Clostridiales
94448.MaxBin.out.001	20	110	3	446.08	0.131443	579546	48.9	k__Bacteria (UID203)	5449	103	57	5	0	84	19	0	0	0	0	19.2	0	0	k__Bacteria;p__Firmicutes;c__Clostridia;o__Clostridiales;f__Peptostreptococcaceae_3;g__Clostridium_3	g__Clostridium_3
94448.MaxBin.out.002	20	110	3	350.11	0.103164	3819497	35.4	o__Clostridiales (UID1212)	172	262	148	40	0	22	236	4	0	0	0	91.78	1.18	0	k__Bacteria;p__Firmicutes;c__Clostridia;o__Clostridiales;f__Peptostreptococcaceae_3;g__Clostridium_3;s__Clostridium_clariflavum	s__Clostridium_clariflavum
94448.MaxBin.out.003	20	110	3	231.23	0.0681347	2529048	51.9	o__Clostridiales (UID1120)	304	250	143	39	3	21	194	35	0	0	0	89.28	12.36	0	k__Bacteria;p__Firmicutes;c__Clostridia;o__Clostridiales;f__Peptostreptococcaceae_3;g__Clostridium_3	g__Clostridium_3
94448.MaxBin.out.004	20	110	3	190.1	0.0560152	1312218	43.6	k__Bacteria (UID203)	5449	102	56	30	0	25	77	0	0	0	0	75.16	0	0	k__Bacteria	k__Bacteria
94448.MaxBin.out.005	20	110	3	183.26	0.0539997	3143482	50.6	k__Bacteria (UID203)	5449	103	57	30	13	1	71	31	0	0	0	98.25	32.43	9.68	k__Bacteria;p__Firmicutes;c__Clostridia;o__Clostridiales;f__Peptostreptococcaceae_3;g__Clostridium_3	g__Clostridium_3
94448.MaxBin.out.006	20	110	3	182.18	0.0536815	3065824	33.6	o__Clostridiales (UID1212)	172	263	149	43	0	3	252	4	4	0	0	97.99	4.92	25	k__Bacteria;p__Firmicutes;c__Clostridia;o__Clostridiales	o__Clostridiales
94448.MaxBin.out.007	20	110	3	138.8	0.0408991	2417819	47.2	o__Clostridiales (UID1120)	304	250	143	37	1	28	217	4	1	0	0	88.33	2.33	14.29	k__Bacteria;p__Firmicutes;c__Clostridia;o__Clostridiales;f__Peptostreptococcaceae_3;g__Clostridium_3	g__Clostridium_3
94448.MaxBin.out.008	20	110	3	120.09	0.0353859	2018441	45.1	o__Clostridiales (UID1212)	172	263	149	42	0	9	252	2	0	0	0	95.53	0.81	50	k__Bacteria;p__Firmicutes;c__Clostridia;o__Clostridiales	o__Clostridiales
94448.MaxBin.out.009	20	110	3	118.47	0.0349086	591916	48.7	k__Bacteria (UID209)	5443	105	59	15	0	67	38	0	0	0	0	38.14	0	0	k__Bacteria;p__Synergistetes;c__Synergistia;o__Synergistales;f__Synergistaceae	f__Synergistaceae
94448.MaxBin.out.010	20	110	3	115.31	0.0339775	1672699	49.6	p__Euryarchaeota (UID3)	148	188	125	41	2	0	185	3	0	0	0	100	0.18	0	k__Archaea;p__Euryarchaeota;c__Methanobacteria;o__Methanobacteriales;f__Methanobacteriaceae;g__Methanothermobacter	g__Methanothermobacter
94448.MaxBin.out.011	20	110	3	115.24	0.0339568	1147006	45.3	k__Bacteria (UID203)	5449	104	58	3	1	88	10	6	0	0	0	23.28	10.34	83.33	k__Bacteria;p__Synergistetes;c__Synergistia;o__Synergistales;f__Synergistaceae	f__Synergistaceae
94448.MaxBin.out.012	20	110	3	110.78	0.0326426	186764	50.7	k__Bacteria (UID203)	5449	104	58	7	4	89	9	6	0	0	0	9.72	5.17	100	k__Bacteria;p__Synergistetes;c__Synergistia;o__Synergistales;f__Synergistaceae	f__Synergistaceae
94448.MaxBin.out.013	20	110	3	109.47	0.0322566	839075	47.9	k__Bacteria (UID203)	5449	104	58	6	0	63	39	2	0	0	0	62.93	1.72	100	k__Bacteria;p__Synergistetes;c__Synergistia;o__Synergistales;f__Synergistaceae	f__Synergistaceae
94448.MaxBin.out.014	20	110	3	89.04	0.0262367	2441973	53	p__Firmicutes (UID239)	1324	176	102	40	1	7	164	5	0	0	0	94.12	2.29	0	k__Bacteria;p__Firmicutes	p__Firmicutes
94448.MaxBin.out.015	20	110	3	68.76	0.020261	3028771	44.6	o__Clostridiales (UID1212)	172	263	149	42	1	6	244	12	1	0	0	97.26	5.17	6.67	k__Bacteria;p__Firmicutes;c__Clostridia;o__Clostridiales	o__Clostridiales
94448.MaxBin.out.016	20	110	3	68.19	0.020093	2758733	43.4	o__Clostridiales (UID1120)	304	250	143	41	1	9	232	9	0	0	0	94.76	3.04	11.11	k__Bacteria;p__Firmicutes;c__Clostridia;o__Clostridiales;f__Peptostreptococcaceae_3;g__Clostridium_3	g__Clostridium_3
94448.MaxBin.out.017	20	110	3	67.19	0.0197983	3917407	37.9	o__Clostridiales (UID1212)	172	263	149	43	0	1	260	2	0	0	0	99.33	0.56	0	k__Bacteria;p__Firmicutes;c__Clostridia;o__Clostridiales;f__Peptostreptococcaceae_3;g__Clostridium_3	g__Clostridium_3
94448.MaxBin.out.018	20	110	3	60.23	0.0177475	2346932	33.1	c__Bacilli (UID285)	586	325	181	41	0	45	264	16	0	0	0	83.54	6.08	18.75	k__Bacteria;p__Firmicutes;c__Bacilli	c__Bacilli
94448.MaxBin.out.019	20	110	3	50.75	0.0149541	4956518	59.9	k__Bacteria (UID1452)	924	163	110	41	0	13	142	7	1	0	0	91.26	6.24	10	k__Bacteria;p__Chloroflexi	p__Chloroflexi
94448.MaxBin.out.020	20	110	3	50.04	0.0147449	2432379	49.3	p__Firmicutes (UID241)	930	213	118	43	0	6	204	2	1	0	0	95.34	2.12	20	k__Bacteria;p__Firmicutes	p__Firmicutes
94448.MaxBin.out.021	20	110	3	40.2	0.0118454	2104798	34	k__Bacteria (UID3187)	2258	180	109	42	0	1	178	1	0	0	0	99.95	0.46	0	k__Bacteria;p__Nitrospirae;c__Nitrospira;o__Nitrospirales;f__Nitrospiraceae;g__Thermodesulfovibrio	g__Thermodesulfovibrio
94448.MaxBin.out.022	20	110	3	34.07	0.0100391	2739415	41.6	o__Clostridiales (UID1212)	172	263	149	41	1	24	238	1	0	0	0	92.14	0.02	100	k__Bacteria;p__Firmicutes;c__Clostridia;o__Clostridiales	o__Clostridiales
94448.MaxBin.out.023	20	110	3	31.28	0.00921702	1332179	49.3	root (UID1)	5656	56	24	0	0	56	0	0	0	0	0	0	0	0	NA	NA
94448.MaxBin.out.024	20	110	3	29.05	0.00855993	3672113	65.3	k__Bacteria (UID1452)	924	163	110	28	0	30	128	5	0	0	0	86.36	3.74	20	k__Bacteria;p__Chloroflexi	p__Chloroflexi
94448.MaxBin.out.025	20	110	3	25.9	0.00763174	3511300	64.4	k__Bacteria (UID1452)	924	163	110	31	7	30	124	9	0	0	0	80.14	2.4	11.11	k__Bacteria;p__Chloroflexi	p__Chloroflexi
94448.MaxBin.out.026	20	110	3	25.76	0.00759049	2121493	49.9	o__Clostridiales (UID1212)	172	263	149	42	0	8	255	0	0	0	0	96.09	0	0	k__Bacteria;p__Firmicutes;c__Clostridia;o__Clostridiales	o__Clostridiales
94448.MaxBin.out.027	20	110	3	24.02	0.00707778	1000891	42.6	o__Clostridiales (UID1120)	304	250	143	38	0	105	145	0	0	0	0	52.45	0	0	k__Bacteria;p__Firmicutes;c__Clostridia;o__Clostridiales;f__Peptostreptococcaceae_3;g__Clostridium_3	g__Clostridium_3
94448.MaxBin.out.028	20	110	3	24	0.00707189	3440818	43.1	k__Bacteria (UID203)	5449	103	57	32	11	2	77	24	0	0	0	96.49	19.3	54.17	k__Bacteria;p__Firmicutes;c__Clostridia;o__Clostridiales;f__Peptostreptococcaceae_3;g__Clostridium_3	g__Clostridium_3
94448.MaxBin.out.029	20	110	3	21.77	0.00641479	4040471	37.3	o__Clostridiales (UID1212)	172	263	149	42	1	5	245	10	3	0	0	97.32	6.26	5.26	k__Bacteria;p__Firmicutes;c__Clostridia;o__Clostridiales	o__Clostridiales
94448.MaxBin.out.030	20	110	3	21.34	0.00628809	2633942	57.8	p__Firmicutes (UID239)	1324	175	101	43	0	11	161	3	0	0	0	90.59	2.97	0	k__Bacteria;p__Firmicutes;c__Clostridia_3;o__Clostridiales_3	o__Clostridiales_3
94448.MaxBin.out.031	20	110	3	20.36	0.00599932	2309170	36.5	o__Clostridiales (UID1120)	304	250	143	42	0	7	241	2	0	0	0	95.45	0.37	50	k__Bacteria;p__Firmicutes;c__Clostridia;o__Clostridiales	o__Clostridiales
94448.MaxBin.out.032	20	110	3	16.36	0.00482067	2098510	54.5	o__Clostridiales (UID1212)	172	263	149	42	1	3	253	7	0	0	0	98.32	4.09	0	k__Bacteria;p__Firmicutes;c__Clostridia;o__Clostridiales	o__Clostridiales
94448.MaxBin.out.033	20	110	3	16.36	0.00482067	1951391	39.8	p__Euryarchaeota (UID3)	148	188	125	43	0	2	186	0	0	0	0	98.93	0	0	k__Archaea;p__Euryarchaeota;c__Methanobacteria;o__Methanobacteriales;f__Methanobacteriaceae;g__Methanobacterium	g__Methanobacterium
94448.MaxBin.out.034	20	110	3	15.91	0.00468807	2332779	66.4	f__Rhodocyclaceae (UID3972)	30	540	241	43	0	13	523	4	0	0	0	96.13	0.83	0	k__Bacteria;p__Proteobacteria;c__Betaproteobacteria;o__Rhodocyclales;f__Rhodocyclaceae	f__Rhodocyclaceae
94448.MaxBin.out.035	20	110	3	14.71	0.00433448	3104212	41.4	p__Euryarchaeota (UID49)	95	228	153	43	0	1	225	2	0	0	0	99.84	0.98	0	k__Archaea;p__Euryarchaeota;c__Methanomicrobia;o__Methanosarcinales;f__Methanosarcinaceae	f__Methanosarcinaceae
94448.MaxBin.out.036	20	110	3	13.47	0.0039691	3620499	57.4	p__Firmicutes (UID239)	1324	176	102	37	6	7	159	10	0	0	0	93.14	2.62	0	k__Bacteria;p__Firmicutes	p__Firmicutes
94448.MaxBin.out.037	20	110	3	13.45	0.0039632	5179091	63.1	k__Bacteria (UID3187)	2258	184	114	37	6	2	161	20	1	0	0	98.25	10.38	0	k__Bacteria;p__Acidobacteria;c__Acidobacteriia;o__Acidobacteriales	o__Acidobacteriales
94448.MaxBin.out.038	20	110	3	13.38	0.00394258	2228196	40.7	c__Clostridia (UID1118)	387	223	124	40	0	8	214	1	0	0	0	96.88	0.4	0	k__Bacteria;p__Firmicutes;c__Clostridia;o__Thermoanaerobacterales	o__Thermoanaerobacterales
94448.MaxBin.out.039	20	110	3	13.06	0.00384828	1942267	31.4	root (UID1)	5656	56	24	0	0	55	1	0	0	0	0	4.17	0	0	NA	NA
94448.MaxBin.out.040	20	110	3	9.75	0.00287295	2217518	60.6	o__Clostridiales (UID1212)	172	263	149	36	6	12	223	28	0	0	0	94.84	10.81	3.57	k__Bacteria;p__Firmicutes;c__Clostridia;o__Clostridiales	o__Clostridiales
94448.MaxBin.out.041	20	110	3	9.66	0.00284643	2920306	38.9	k__Bacteria (UID203)	5449	103	57	8	0	52	45	6	0	0	0	76.48	8.77	16.67	k__Bacteria;p__Firmicutes;c__Clostridia;o__Clostridiales;f__Peptostreptococcaceae_3;g__Clostridium_3	g__Clostridium_3
94448.MaxBin.out.042	20	110	3	9.35	0.00275509	2399245	57.7	p__Firmicutes (UID239)	1324	176	102	41	1	7	160	9	0	0	0	95.5	3.4	0	k__Bacteria;p__Firmicutes	p__Firmicutes
94448.MaxBin.out.043	20	110	3	9.1	0.00268142	1898171	41.2	o__Clostridiales (UID1212)	172	263	149	20	0	39	221	3	0	0	0	92.45	1.17	0	k__Bacteria;p__Firmicutes;c__Clostridia;o__Clostridiales	o__Clostridiales
94448.MaxBin.out.044	20	110	3	9.05	0.00266669	2634652	48.5	c__Clostridia (UID1085)	35	420	196	40	1	26	382	12	0	0	0	93.33	3.21	16.67	k__Bacteria;p__Firmicutes;c__Clostridia;o__Clostridiales_4;f__Syntrophomonadaceae	f__Syntrophomonadaceae
94448.MaxBin.out.045	20	110	3	7.71	0.00227184	1503893	40	k__Bacteria (UID209)	5443	105	59	37	0	19	86	0	0	0	0	77.63	0	0	k__Bacteria	k__Bacteria
94448.MaxBin.out.046	20	110	3	7.61	0.00224238	1739657	53.9	o__Clostridiales (UID1212)	172	263	149	40	1	53	204	6	0	0	0	73.1	2.97	0	k__Bacteria;p__Firmicutes;c__Clostridia;o__Clostridiales	o__Clostridiales
94448.MaxBin.out.047	20	110	3	7.56	0.00222764	2994488	37.1	o__Clostridiales (UID1212)	172	263	149	17	0	117	128	14	4	0	0	60.48	9.9	0	k__Bacteria;p__Firmicutes;c__Clostridia;o__Clostridiales	o__Clostridiales
94448.MaxBin.out.048	20	110	3	7.49	0.00220702	1110909	49.2	c__Clostridia (UID1118)	387	223	124	28	1	98	122	3	0	0	0	58.42	1.61	0	k__Bacteria;p__Firmicutes;c__Clostridia;o__Thermoanaerobacterales	o__Thermoanaerobacterales
94448.MaxBin.out.049	20	110	3	7.48	0.00220407	2072672	45	c__Clostridia (UID1085)	35	420	196	24	3	250	142	27	1	0	0	40.43	7.27	3.33	k__Bacteria;p__Firmicutes;c__Clostridia;o__Clostridiales_2;f__Peptococcaceae	f__Peptococcaceae
94448.MaxBin.out.050	20	110	3	7.47	0.00220112	2602020	40.8	o__Clostridiales (UID1120)	304	250	143	26	10	102	114	34	0	0	0	52.17	11.37	0	k__Bacteria;p__Firmicutes;c__Clostridia;o__Clostridiales;f__Peptostreptococcaceae_3;g__Clostridium_3	g__Clostridium_3
94448.MaxBin.out.051	20	110	3	7.43	0.00218934	2440295	44.7	o__Clostridiales (UID1212)	172	263	149	41	1	31	201	31	0	0	0	83.53	13.81	3.23	k__Bacteria;p__Firmicutes;c__Clostridia;o__Clostridiales;f__Peptostreptococcaceae_3;g__Clostridium_3	g__Clostridium_3
94448.MaxBin.out.052	20	110	3	7.34	0.00216282	1967589	41.8	k__Bacteria (UID203)	5449	103	57	20	21	20	49	34	0	0	0	67.54	18.58	2.94	k__Bacteria;p__Firmicutes;c__Clostridia;o__Clostridiales;f__Peptostreptococcaceae_3;g__Clostridium_3	g__Clostridium_3
94448.MaxBin.out.053	20	110	3	6.95	0.0020479	2402289	49.3	o__Clostridiales (UID1212)	172	263	149	23	8	97	129	34	3	0	0	62.29	15.21	0	k__Bacteria;p__Firmicutes;c__Clostridia;o__Clostridiales	o__Clostridiales
94449.MaxBin.out.001	20	110	2	472.02	0.178217	3668062	35.6	o__Clostridiales (UID1212)	172	262	148	30	1	69	190	3	0	0	0	75.85	1.35	66.67	k__Bacteria;p__Firmicutes;c__Clostridia;o__Clostridiales;f__Peptostreptococcaceae_3;g__Clostridium_3;s__Clostridium_clariflavum	s__Clostridium_clariflavum
94449.MaxBin.out.002	20	110	2	319.26	0.120541	3628931	49.8	k__Bacteria (UID203)	5449	103	57	24	19	1	51	40	11	0	0	98.25	58.7	5.48	k__Bacteria;p__Firmicutes;c__Clostridia;o__Clostridiales;f__Peptostreptococcaceae_3;g__Clostridium_3	g__Clostridium_3
94449.MaxBin.out.003	20	110	2	214.64	0.08104	1205039	49.1	o__Clostridiales (UID1212)	172	263	149	15	2	146	115	2	0	0	0	47.73	0.4	0	k__Bacteria;p__Firmicutes;c__Clostridia;o__Clostridiales;f__Peptostreptococcaceae_3;g__Clostridium_3	g__Clostridium_3
94449.MaxBin.out.004	20	110	2	138.59	0.0523263	2677947	46.9	o__Clostridiales (UID1120)	304	250	143	34	2	30	212	8	0	0	0	91.07	3.5	0	k__Bacteria;p__Firmicutes;c__Clostridia;o__Clostridiales;f__Peptostreptococcaceae_3;g__Clostridium_3	g__Clostridium_3
94449.MaxBin.out.005	20	110	2	136.73	0.0516241	3000233	33.9	o__Clostridiales (UID1212)	172	263	149	43	0	3	256	4	0	0	0	97.99	1.57	0	k__Bacteria;p__Firmicutes;c__Clostridia;o__Clostridiales	o__Clostridiales
94449.MaxBin.out.006	20	110	2	134.22	0.0506764	2042406	45.1	o__Clostridiales (UID1212)	172	263	149	42	0	10	251	2	0	0	0	94.85	0.36	0	k__Bacteria;p__Firmicutes;c__Clostridia;o__Clostridiales	o__Clostridiales
94449.MaxBin.out.007	20	110	2	134.08	0.0506235	2167794	52.6	o__Clostridiales (UID1120)	304	250	143	37	4	28	211	11	0	0	0	86.83	2.34	36.36	k__Bacteria;p__Firmicutes;c__Clostridia;o__Clostridiales;f__Peptostreptococcaceae_3;g__Clostridium_3	g__Clostridium_3
94449.MaxBin.out.008	20	110	2	105.19	0.0397158	1134357	44.6	k__Bacteria (UID203)	5449	102	56	32	0	18	83	1	0	0	0	85.88	1.79	100	k__Bacteria	k__Bacteria
94449.MaxBin.out.009	20	110	2	98.6	0.0372276	3260405	43	o__Clostridiales (UID1120)	304	250	143	42	1	5	237	8	0	0	0	96.5	2.97	0	k__Bacteria;p__Firmicutes;c__Clostridia;o__Clostridiales;f__Peptostreptococcaceae_3;g__Clostridium_3	g__Clostridium_3
94449.MaxBin.out.010	20	110	2	98.57	0.0372163	2234023	47.6	k__Bacteria (UID209)	5443	105	59	43	0	1	104	0	0	0	0	98.31	0	0	k__Bacteria;p__Synergistetes;c__Synergistia;o__Synergistales;f__Synergistaceae	f__Synergistaceae
94449.MaxBin.out.011	20	110	2	76.51	0.0288873	1850145	33.6	c__Bacilli (UID285)	586	325	181	42	0	42	269	14	0	0	0	83.54	5.8	28.57	k__Bacteria;p__Firmicutes;c__Bacilli	c__Bacilli
94449.MaxBin.out.012	20	110	2	72.97	0.0275507	766249	32.4	root (UID1)	5656	56	24	0	0	56	0	0	0	0	0	0	0	0	NA	NA
94449.MaxBin.out.013	20	110	2	71.87	0.0271354	2320723	41.6	o__Clostridiales (UID1212)	172	263	149	39	0	52	211	0	0	0	0	76.43	0	0	k__Bacteria;p__Firmicutes;c__Clostridia;o__Clostridiales	o__Clostridiales
94449.MaxBin.out.014	20	110	2	70.92	0.0267767	2398092	53.1	p__Firmicutes (UID239)	1324	176	102	42	1	5	166	5	0	0	0	95.1	1.89	20	k__Bacteria;p__Firmicutes	p__Firmicutes
94449.MaxBin.out.015	20	110	2	50.21	0.0189574	2947010	44.9	o__Clostridiales (UID1212)	172	263	149	43	0	6	254	2	1	0	0	97.26	2.35	20	k__Bacteria;p__Firmicutes;c__Clostridia;o__Clostridiales	o__Clostridiales
94449.MaxBin.out.016	20	110	2	48.19	0.0181947	2508391	49.2	p__Firmicutes (UID241)	930	213	118	43	0	5	204	4	0	0	0	95.76	2.12	25	k__Bacteria;p__Firmicutes	p__Firmicutes
94449.MaxBin.out.017	20	110	2	43.26	0.0163333	1347436	50.1	p__Euryarchaeota (UID3)	148	188	125	34	2	47	129	12	0	0	0	73.63	6.58	75	k__Archaea;p__Euryarchaeota;c__Methanobacteria;o__Methanobacteriales;f__Methanobacteriaceae;g__Methanothermobacter	g__Methanothermobacter
94449.MaxBin.out.018	20	110	2	41.02	0.0154876	2524647	36.3	o__Clostridiales (UID1120)	304	250	143	43	0	3	246	1	0	0	0	97.9	0.7	0	k__Bacteria;p__Firmicutes;c__Clostridia;o__Clostridiales	o__Clostridiales
94449.MaxBin.out.019	20	110	2	26.94	0.0101715	3436524	36.2	o__Clostridiales (UID1212)	172	263	149	38	2	52	195	6	10	0	0	74.5	10.07	0	k__Bacteria;p__Firmicutes;c__Clostridia;o__Clostridiales	o__Clostridiales
94449.MaxBin.out.020	20	110	2	26.41	0.00997142	4336407	38.4	o__Clostridiales (UID1212)	172	263	149	40	3	12	200	49	2	0	0	95.3	25.73	0	k__Bacteria;p__Firmicutes;c__Clostridia;o__Clostridiales;f__Peptostreptococcaceae_3;g__Clostridium_3	g__Clostridium_3
94449.MaxBin.out.021	20	110	2	22.63	0.00854423	2141098	49.9	o__Clostridiales (UID1212)	172	263	149	42	0	8	255	0	0	0	0	96.09	0	0	k__Bacteria;p__Firmicutes;c__Clostridia;o__Clostridiales	o__Clostridiales
94449.MaxBin.out.022	20	110	2	22.11	0.0083479	2501371	57.8	p__Firmicutes (UID239)	1324	175	101	39	4	11	158	6	0	0	0	90.59	1.44	0	k__Bacteria;p__Firmicutes;c__Clostridia_3;o__Clostridiales_3	o__Clostridiales_3
94449.MaxBin.out.023	20	110	2	21.57	0.00814402	5117525	60	k__Bacteria (UID1452)	924	163	110	41	0	10	146	6	1	0	0	92.73	5.33	0	k__Bacteria;p__Chloroflexi	p__Chloroflexi
94449.MaxBin.out.024	20	110	2	20.67	0.00780421	2704237	42.6	o__Clostridiales (UID1120)	304	250	143	43	0	5	233	10	2	0	0	96.5	6.29	0	k__Bacteria;p__Firmicutes;c__Clostridia;o__Clostridiales;f__Peptostreptococcaceae_3;g__Clostridium_3	g__Clostridium_3
94449.MaxBin.out.025	20	110	2	18.73	0.00707174	2035407	40	p__Euryarchaeota (UID3)	148	188	125	43	0	2	185	1	0	0	0	98.93	0.8	0	k__Archaea;p__Euryarchaeota;c__Methanobacteria;o__Methanobacteriales;f__Methanobacteriaceae;g__Methanobacterium	g__Methanobacterium
94449.MaxBin.out.026	20	110	2	16.91	0.00638458	4095997	64.5	k__Bacteria (UID1452)	924	163	110	42	0	15	146	2	0	0	0	89.55	1.82	0	k__Bacteria;p__Chloroflexi	p__Chloroflexi
94449.MaxBin.out.027	20	110	2	16.86	0.0063657	2110340	54.3	k__Bacteria (UID203)	5449	104	58	26	17	1	80	23	0	0	0	98.28	8.15	4.35	k__Bacteria;p__Firmicutes;c__Clostridia;o__Clostridiales	o__Clostridiales
94449.MaxBin.out.028	20	110	2	14.08	0.00531608	4951173	63.1	k__Bacteria (UID3187)	2258	184	114	43	0	2	180	2	0	0	0	98.25	1.75	0	k__Bacteria;p__Acidobacteria;c__Acidobacteriia;o__Acidobacteriales	o__Acidobacteriales
94449.MaxBin.out.029	20	110	2	11.06	0.00417584	2262566	40.8	c__Clostridia (UID1118)	387	223	124	43	0	3	218	2	0	0	0	97.98	0.81	0	k__Bacteria;p__Firmicutes;c__Clostridia;o__Thermoanaerobacterales	o__Thermoanaerobacterales
94449.MaxBin.out.030	20	110	2	9.71	0.00366613	1965019	53.7	o__Clostridiales (UID1212)	172	263	149	26	0	54	207	2	0	0	0	85.79	1.34	0	k__Bacteria;p__Firmicutes;c__Clostridia;o__Clostridiales	o__Clostridiales
94449.MaxBin.out.031	20	110	2	9.61	0.00362837	1987152	53.4	k__Bacteria (UID203)	5449	104	58	12	13	51	34	19	0	0	0	48.31	13.79	5.26	k__Bacteria;p__Chloroflexi	p__Chloroflexi
94449.MaxBin.out.032	20	110	2	9.14	0.00345092	7195517	34.4	k__Bacteria (UID3187)	2258	180	109	32	3	13	92	44	22	4	5	96.79	90.75	0.49	k__Bacteria;p__Nitrospirae;c__Nitrospira;o__Nitrospirales;f__Nitrospiraceae;g__Thermodesulfovibrio	g__Thermodesulfovibrio
94449.MaxBin.out.033	20	110	2	8.8	0.00332255	1993712	41.1	o__Clostridiales (UID1212)	172	263	149	36	0	14	245	4	0	0	0	95.94	1.85	25	k__Bacteria;p__Firmicutes;c__Clostridia;o__Clostridiales	o__Clostridiales
94449.MaxBin.out.034	20	110	2	8.29	0.00312999	3325894	39.1	o__Clostridiales (UID1120)	304	250	143	12	6	85	100	59	6	0	0	73.71	31.24	1.3	k__Bacteria;p__Firmicutes;c__Clostridia;o__Clostridiales;f__Peptostreptococcaceae_3;g__Clostridium_3	g__Clostridium_3
94449.MaxBin.out.035	20	110	2	8.22	0.00310356	1904835	60.8	o__Clostridiales (UID1212)	172	263	149	41	0	34	220	9	0	0	0	86.51	2.96	11.11	k__Bacteria;p__Firmicutes;c__Clostridia;o__Clostridiales	o__Clostridiales
94449.MaxBin.out.036	20	110	2	7.96	0.0030054	5013894	46	k__Bacteria (UID203)	5449	103	57	18	22	23	40	19	14	3	4	71.24	48.01	19.11	k__Bacteria;p__Firmicutes;c__Clostridia;o__Clostridiales;f__Peptostreptococcaceae_3;g__Clostridium_3	g__Clostridium_3
94449.MaxBin.out.037	20	110	2	7.69	0.00290345	3500340	39.1	k__Bacteria (UID203)	5449	104	58	7	2	55	27	19	3	0	0	64.93	34.48	3.57	k__Bacteria;p__Firmicutes;c__Clostridia;o__Clostridiales;f__Peptostreptococcaceae_3;g__Clostridium_3	g__Clostridium_3
94449.MaxBin.out.038	20	110	2	7.51	0.00283549	1853409	55.2	o__Clostridiales (UID1212)	172	263	149	33	7	48	191	24	0	0	0	77.44	5.33	0	k__Bacteria;p__Firmicutes;c__Clostridia;o__Clostridiales;f__Ruminococcaceae	f__Ruminococcaceae
94449.MaxBin.out.039	20	110	2	7.5	0.00283172	603908	40.7	k__Bacteria (UID209)	5443	105	59	23	0	57	48	0	0	0	0	39.52	0	0	k__Bacteria	k__Bacteria
94449.MaxBin.out.040	20	110	2	6.79	0.00256365	1633879	41.7	k__Bacteria (UID203)	5449	103	57	16	22	33	36	16	15	3	0	53.17	26.22	13.92	k__Bacteria;p__Firmicutes;c__Clostridia;o__Clostridiales;f__Peptostreptococcaceae_3;g__Clostridium_3	g__Clostridium_3
94449.MaxBin.out.041	20	110	2	6.42	0.00242395	1403294	40.5	k__Bacteria (UID3187)	2258	180	109	13	0	150	30	0	0	0	0	12.1	0	0	k__Bacteria;p__Nitrospirae;c__Nitrospira;o__Nitrospirales;f__Nitrospiraceae;g__Thermodesulfovibrio	g__Thermodesulfovibrio
94449.MaxBin.out.042	20	110	2	6.11	0.00230691	2091442	50.2	c__Clostridia (UID1085)	35	420	196	23	6	150	200	66	4	0	0	62.09	14	5.13	k__Bacteria;p__Firmicutes;c__Clostridia;o__Clostridiales_4;f__Syntrophomonadaceae	f__Syntrophomonadaceae
94451.MaxBin.out.001	20	6	2	335.37	0.202106	1978146	47	o__Clostridiales (UID1120)	304	250	143	20	3	59	183	8	0	0	0	83.12	2.59	0	k__Bacteria;p__Firmicutes;c__Clostridia;o__Clostridiales;f__Peptostreptococcaceae_3;g__Clostridium_3	g__Clostridium_3
94451.MaxBin.out.002	20	6	2	187.75	0.113145	3888977	35.1	o__Clostridiales (UID1212)	172	262	148	23	1	50	207	5	0	0	0	84.61	1.94	80	k__Bacteria;p__Firmicutes;c__Clostridia;o__Clostridiales;f__Peptostreptococcaceae_3;g__Clostridium_3;s__Clostridium_clariflavum	s__Clostridium_clariflavum
94451.MaxBin.out.003	20	6	2	140.85	0.0848811	869899	40.8	root (UID1)	5656	56	24	0	0	55	1	0	0	0	0	4.17	0	0	NA	NA
94451.MaxBin.out.004	20	6	2	140.09	0.0844231	1758920	45.9	o__Clostridiales (UID1212)	172	263	149	39	0	19	241	3	0	0	0	91.05	1.14	0	k__Bacteria;p__Firmicutes;c__Clostridia;o__Clostridiales	o__Clostridiales
94451.MaxBin.out.005	20	6	2	109.34	0.0658921	1511888	50.7	k__Bacteria (UID2328)	3167	126	75	40	0	12	111	3	0	0	0	89.98	2.67	33.33	k__Bacteria;p__Tenericutes;c__Mollicutes	c__Mollicutes
94451.MaxBin.out.006	20	6	2	75.95	0.0457701	3552752	51.4	k__Bacteria (UID203)	5449	103	57	3	39	2	48	52	1	0	0	97.37	32.31	0	k__Bacteria;p__Firmicutes;c__Clostridia;o__Clostridiales;f__Peptostreptococcaceae_3;g__Clostridium_3	g__Clostridium_3
94451.MaxBin.out.007	20	6	2	55.35	0.0333558	3053159	41.6	p__Euryarchaeota (UID49)	95	228	153	42	1	4	221	3	0	0	0	97.88	1.36	33.33	k__Archaea;p__Euryarchaeota;c__Methanomicrobia;o__Methanosarcinales;f__Methanosarcinaceae	f__Methanosarcinaceae
94451.MaxBin.out.008	20	6	2	50.85	0.030644	1928932	40.1	p__Euryarchaeota (UID3)	148	188	125	43	0	2	186	0	0	0	0	98.93	0	0	k__Archaea;p__Euryarchaeota;c__Methanobacteria;o__Methanobacteriales;f__Methanobacteriaceae;g__Methanobacterium	g__Methanobacterium
94451.MaxBin.out.009	20	6	2	47.03	0.0283419	2627250	32.5	o__Clostridiales (UID1120)	304	250	143	40	2	14	232	4	0	0	0	91.89	1.82	0	k__Bacteria;p__Firmicutes;c__Clostridia;o__Clostridiales	o__Clostridiales
94451.MaxBin.out.010	20	6	2	46.53	0.0280406	458480	35.2	root (UID1)	5656	56	24	0	0	56	0	0	0	0	0	0	0	0	NA	NA
94451.MaxBin.out.011	20	6	2	34.33	0.0206884	2357091	43.2	p__Firmicutes (UID241)	930	213	118	34	9	10	188	15	0	0	0	96.61	2.85	0	k__Bacteria;p__Firmicutes	p__Firmicutes
94451.MaxBin.out.012	20	6	2	34.18	0.0205981	2800792	50.7	o__Clostridiales (UID1120)	304	250	143	40	3	11	227	7	4	1	0	95.1	6.32	8	k__Bacteria;p__Firmicutes;c__Clostridia;o__Clostridiales;f__Peptostreptococcaceae_3;g__Clostridium_3	g__Clostridium_3
94451.MaxBin.out.013	20	6	2	32.79	0.0197604	2521069	42	o__Clostridiales (UID1212)	172	263	149	23	2	54	203	6	0	0	0	86.83	2.24	16.67	k__Bacteria;p__Firmicutes;c__Clostridia;o__Clostridiales	o__Clostridiales
94451.MaxBin.out.014	20	6	2	24.55	0.0147947	2580985	49	p__Firmicutes (UID241)	930	213	118	43	0	4	206	3	0	0	0	96.61	1.69	0	k__Bacteria;p__Firmicutes	p__Firmicutes
94451.MaxBin.out.015	20	6	2	21.1	0.0127156	1814797	29.6	k__Bacteria (UID2328)	3167	126	75	43	0	1	125	0	0	0	0	99.88	0	0	k__Bacteria;p__Tenericutes;c__Mollicutes	c__Mollicutes
94451.MaxBin.out.016	20	6	2	20.59	0.0124082	3563035	35.8	c__Clostridia (UID1118)	387	223	124	41	1	30	175	18	0	0	0	83.87	8.09	5.56	k__Bacteria;p__Firmicutes;c__Clostridia;o__Clostridiales	o__Clostridiales
94451.MaxBin.out.017	20	6	2	19.08	0.0114983	2658154	49.4	o__Clostridiales (UID1212)	172	263	149	41	2	4	251	8	0	0	0	97.32	4.03	12.5	k__Bacteria;p__Firmicutes;c__Clostridia;o__Clostridiales	o__Clostridiales
94451.MaxBin.out.018	20	6	2	14.36	0.00865383	2057419	50.1	o__Clostridiales (UID1212)	172	263	149	42	0	8	255	0	0	0	0	96.09	0	0	k__Bacteria;p__Firmicutes;c__Clostridia;o__Clostridiales	o__Clostridiales
94451.MaxBin.out.019	20	6	2	13.78	0.00830431	1513621	31.4	o__Clostridiales (UID1375)	50	332	124	22	0	172	146	13	1	0	0	42.84	5.2	0	k__Bacteria;p__Firmicutes;c__Clostridia;o__Clostridiales;f__Peptostreptococcaceae;g__Clostridium	g__Clostridium
94451.MaxBin.out.020	20	6	2	13.39	0.00806928	2628725	48.4	c__Clostridia (UID1085)	35	420	196	41	0	6	413	1	0	0	0	97.45	0.51	0	k__Bacteria;p__Firmicutes;c__Clostridia;o__Clostridiales_4;f__Syntrophomonadaceae	f__Syntrophomonadaceae
94451.MaxBin.out.021	20	6	2	13.21	0.0079608	1789444	37.2	o__Clostridiales (UID1120)	304	250	143	20	0	84	161	5	0	0	0	79.27	2.17	20	k__Bacteria;p__Firmicutes;c__Clostridia;o__Clostridiales	o__Clostridiales
94451.MaxBin.out.022	20	6	2	13.03	0.00785233	2033361	41.3	o__Clostridiales (UID1212)	172	263	149	42	0	5	257	1	0	0	0	97.32	0.34	0	k__Bacteria;p__Firmicutes;c__Clostridia;o__Clostridiales	o__Clostridiales
94451.MaxBin.out.023	20	6	2	12.86	0.00774988	3377893	63.7	k__Bacteria (UID203)	5449	104	58	30	13	0	68	36	0	0	0	100	31.58	2.78	k__Bacteria;p__Firmicutes;c__Clostridia;o__Clostridiales	o__Clostridiales
94451.MaxBin.out.024	20	6	2	12.31	0.00741843	3430472	37.7	o__Clostridiales (UID1120)	304	250	143	42	1	4	225	18	3	0	0	97.83	10.96	3.7	k__Bacteria;p__Firmicutes;c__Clostridia;o__Clostridiales	o__Clostridiales
94451.MaxBin.out.025	20	6	2	12.26	0.0073883	1098863	33.2	k__Bacteria (UID203)	5449	104	58	14	12	52	31	14	7	0	0	35.34	12.95	20	k__Bacteria;p__Firmicutes;c__Clostridia;o__Clostridiales	o__Clostridiales
94451.MaxBin.out.026	20	6	2	11.42	0.00688209	1165137	49.5	k__Bacteria (UID209)	5443	105	59	18	7	50	41	14	0	0	0	49.61	9.22	7.14	k__Bacteria	k__Bacteria
94451.MaxBin.out.027	20	6	2	11.14	0.00671335	2545554	41.7	k__Bacteria (UID203)	5449	103	58	5	34	18	30	29	18	3	5	74.14	43.78	5.3	k__Bacteria;p__Firmicutes;c__Clostridia;o__Thermoanaerobacterales;f__Thermoanaerobacteraceae	f__Thermoanaerobacteraceae
94451.MaxBin.out.028	20	6	2	11.05	0.00665911	2914755	36	o__Clostridiales (UID1212)	172	263	149	32	0	100	146	16	1	0	0	56.91	9.9	0	k__Bacteria;p__Firmicutes;c__Clostridia;o__Clostridiales;f__Peptostreptococcaceae_3;g__Clostridium_3	g__Clostridium_3
94451.MaxBin.out.029	20	6	2	10.82	0.00652051	4195334	28.7	k__Bacteria (UID203)	5449	104	58	3	5	50	28	25	1	0	0	81.03	39.66	0	k__Bacteria;p__Firmicutes;c__Clostridia;o__Clostridiales;f__Peptostreptococcaceae;g__Clostridium	g__Clostridium
94451.MaxBin.out.030	20	6	2	9.86	0.00594198	477881	39.8	k__Bacteria (UID203)	5449	103	57	3	0	95	8	0	0	0	0	12.28	0	0	k__Bacteria;p__Proteobacteria;c__Alphaproteobacteria;o__Rickettsiales	o__Rickettsiales
94451.MaxBin.out.031	20	6	2	9.6	0.00578529	4800598	33.5	k__Bacteria (UID203)	5449	104	58	2	2	68	24	11	1	0	0	53.61	20.69	0	k__Bacteria;p__Firmicutes;c__Clostridia;o__Clostridiales;f__Peptostreptococcaceae_3;g__Clostridium_3	g__Clostridium_3
94451.MaxBin.out.032	20	6	2	9.44	0.00568887	2076509	40.2	c__Clostridia (UID1085)	35	420	196	41	2	25	381	14	0	0	0	91.38	2.88	0	k__Bacteria;p__Firmicutes;c__Clostridia;o__Clostridiales_4;f__Syntrophomonadaceae	f__Syntrophomonadaceae
94451.MaxBin.out.033	20	6	2	9.17	0.00552616	3224472	47	p__Firmicutes (UID1022)	100	295	158	31	9	31	153	105	6	0	0	90.14	43.62	0.81	k__Bacteria;p__Firmicutes;c__Clostridia	c__Clostridia
94451.MaxBin.out.034	20	6	2	8.85	0.00533332	2431268	36.9	k__Bacteria (UID203)	5449	104	58	8	28	29	32	26	12	5	0	58.45	25.77	18.48	k__Bacteria;p__Firmicutes;c__Clostridia;o__Clostridiales	o__Clostridiales
94451.MaxBin.out.035	20	6	2	8.6	0.00518266	2637691	32.5	k__Bacteria (UID203)	5449	104	58	3	4	58	23	20	2	1	0	68.1	43.97	21.88	k__Bacteria;p__Firmicutes;c__Clostridia;o__Clostridiales	o__Clostridiales
94451.MaxBin.out.036	20	6	2	8.5	0.0051224	1513440	37	k__Bacteria (UID203)	5449	104	58	8	0	58	46	0	0	0	0	68.97	0	0	k__Bacteria;p__Firmicutes;c__Clostridia;o__Clostridiales_2;f__Peptococcaceae	f__Peptococcaceae
94451.MaxBin.out.037	20	6	2	8.45	0.00509226	1829718	60.7	o__Clostridiales (UID1212)	172	263	149	39	0	31	231	1	0	0	0	85.67	0.67	100	k__Bacteria;p__Firmicutes;c__Clostridia;o__Clostridiales	o__Clostridiales
94451.MaxBin.out.038	20	6	2	8.12	0.00489339	1579232	48.1	o__Clostridiales (UID1212)	172	263	149	22	3	112	131	20	0	0	0	55.49	8.45	0	k__Bacteria;p__Firmicutes;c__Clostridia;o__Clostridiales	o__Clostridiales
94451.MaxBin.out.039	20	6	2	8.06	0.00485724	1308677	38.1	c__Clostridia (UID1085)	35	420	196	10	8	188	178	50	4	0	0	55.99	13.49	0	k__Bacteria;p__Firmicutes;c__Clostridia;o__Clostridiales_2;f__Peptococcaceae	f__Peptococcaceae
94451.MaxBin.out.040	20	6	2	8.03	0.00483916	1979240	54.7	o__Clostridiales (UID1212)	172	263	149	41	1	29	218	16	0	0	0	86.57	6.19	0	k__Bacteria;p__Firmicutes;c__Clostridia;o__Clostridiales	o__Clostridiales
94451.MaxBin.out.041	20	6	2	7.91	0.00476684	3244204	45.1	k__Bacteria (UID203)	5449	103	57	18	20	9	53	23	7	2	9	91.47	42.89	24.39	k__Bacteria;p__Firmicutes;c__Clostridia;o__Clostridiales	o__Clostridiales
94451.MaxBin.out.042	20	6	2	7.6	0.00458002	2968736	47.4	o__Clostridiales (UID1212)	172	263	149	13	6	88	119	56	0	0	0	72.88	22.13	10.71	k__Bacteria;p__Firmicutes;c__Clostridia;o__Clostridiales;f__Peptostreptococcaceae_3;g__Clostridium_3	g__Clostridium_3
94451.MaxBin.out.043	20	6	2	7.51	0.00452579	3958988	41.9	o__Clostridiales (UID1212)	172	263	149	18	3	79	127	45	10	2	0	73.83	35.26	0	k__Bacteria;p__Firmicutes;c__Clostridia;o__Clostridiales;f__Peptostreptococcaceae_3;g__Clostridium_3	g__Clostridium_3
94451.MaxBin.out.044	20	6	2	7.17	0.00432089	2589149	37.1	o__Clostridiales (UID1212)	172	263	149	12	3	97	109	42	12	3	0	69.52	35.08	8.33	k__Bacteria;p__Firmicutes;c__Clostridia;o__Clostridiales	o__Clostridiales
94451.MaxBin.out.045	20	6	2	7.15	0.00430884	2678376	39.2	k__Bacteria (UID203)	5449	103	57	8	2	60	30	8	5	0	0	59.43	25.26	21.74	k__Bacteria;p__Firmicutes;c__Clostridia;o__Clostridiales	o__Clostridiales
94452.MaxBin.out.001	20	68	1	445.9	0.106079	458128	31.1	k__Bacteria (UID203)	5449	102	57	2	0	89	13	0	0	0	0	18.42	0	0	k__Bacteria;p__Thermotogae;c__Thermotogae;o__Thermotogales;f__Thermotogaceae	f__Thermotogaceae
94452.MaxBin.out.002	20	68	1	405	0.0963492	1070136	49.2	o__Clostridiales (UID1120)	304	250	143	11	0	148	102	0	0	0	0	42.48	0	0	k__Bacteria;p__Firmicutes;c__Clostridia;o__Clostridiales;f__Peptostreptococcaceae_3;g__Clostridium_3	g__Clostridium_3
94452.MaxBin.out.003	20	68	1	309.11	0.073537	1971323	50.5	o__Clostridiales (UID1120)	304	250	143	21	10	111	92	45	2	0	0	50.58	18.09	27.45	k__Bacteria;p__Firmicutes;c__Clostridia;o__Clostridiales;f__Peptostreptococcaceae_3;g__Clostridium_3	g__Clostridium_3
94452.MaxBin.out.004	20	68	1	287.45	0.0683841	2280015	52.5	o__Clostridiales (UID1120)	304	250	143	15	10	81	78	86	5	0	0	70.89	40.56	23.76	k__Bacteria;p__Firmicutes;c__Clostridia;o__Clostridiales;f__Peptostreptococcaceae_3;g__Clostridium_3	g__Clostridium_3
94452.MaxBin.out.005	20	68	1	254.35	0.0605097	4425270	35.4	o__Clostridiales (UID1212)	172	262	148	39	0	14	245	3	0	0	0	95	1.49	33.33	k__Bacteria;p__Firmicutes;c__Clostridia;o__Clostridiales;f__Peptostreptococcaceae_3;g__Clostridium_3;s__Clostridium_clariflavum	s__Clostridium_clariflavum
94452.MaxBin.out.006	20	68	1	250.99	0.0597103	2171852	47.4	k__Bacteria (UID209)	5443	105	59	43	0	1	104	0	0	0	0	98.31	0	0	k__Bacteria;p__Synergistetes;c__Synergistia;o__Synergistales;f__Synergistaceae	f__Synergistaceae
94452.MaxBin.out.007	20	68	1	177	0.0421082	1782162	45.4	o__Clostridiales (UID1212)	172	263	149	41	0	21	241	1	0	0	0	90.83	0.13	0	k__Bacteria;p__Firmicutes;c__Clostridia;o__Clostridiales	o__Clostridiales
94452.MaxBin.out.008	20	68	1	173.43	0.0412589	2358076	47.1	o__Clostridiales (UID1120)	304	250	143	32	1	42	201	7	0	0	0	88.39	3.17	0	k__Bacteria;p__Firmicutes;c__Clostridia;o__Clostridiales;f__Peptostreptococcaceae_3;g__Clostridium_3	g__Clostridium_3
94452.MaxBin.out.009	20	68	1	172.56	0.0410519	2708664	33.7	o__Clostridiales (UID1212)	172	263	149	43	0	3	253	7	0	0	0	97.99	2.57	0	k__Bacteria;p__Firmicutes;c__Clostridia;o__Clostridiales	o__Clostridiales
94452.MaxBin.out.010	20	68	1	159.71	0.0379949	663634	48.8	k__Bacteria (UID209)	5443	105	59	30	0	43	62	0	0	0	0	49.05	0	0	k__Bacteria;p__Synergistetes;c__Synergistia;o__Synergistales;f__Synergistaceae	f__Synergistaceae
94452.MaxBin.out.011	20	68	1	106.67	0.0253767	2475425	57.7	p__Firmicutes (UID239)	1324	176	102	43	0	3	169	4	0	0	0	97.06	2.29	0	k__Bacteria;p__Firmicutes	p__Firmicutes
94452.MaxBin.out.012	20	68	1	93.54	0.0222531	2857071	41.6	o__Clostridiales (UID1212)	172	263	149	34	0	29	234	0	0	0	0	91.47	0	0	k__Bacteria;p__Firmicutes;c__Clostridia;o__Clostridiales	o__Clostridiales
94452.MaxBin.out.013	20	68	1	86.87	0.0206663	4622486	60.1	k__Bacteria (UID1452)	924	163	110	41	0	14	142	7	0	0	0	90	5.03	0	k__Bacteria;p__Chloroflexi	p__Chloroflexi
94452.MaxBin.out.014	20	68	1	86.78	0.0206449	2671956	45.2	o__Clostridiales (UID1212)	172	263	149	33	6	15	235	12	1	0	0	94.91	6.71	6.67	k__Bacteria;p__Firmicutes;c__Clostridia;o__Clostridiales	o__Clostridiales
94452.MaxBin.out.015	20	68	1	85.34	0.0203023	2182176	40.9	c__Clostridia (UID1118)	387	223	124	43	0	3	219	1	0	0	0	97.98	0.4	0	k__Bacteria;p__Firmicutes;c__Clostridia;o__Thermoanaerobacterales	o__Thermoanaerobacterales
94452.MaxBin.out.016	20	68	1	85.28	0.020288	4366099	38	o__Clostridiales (UID1212)	172	263	149	40	1	7	246	8	2	0	0	96.64	5.93	0	k__Bacteria;p__Firmicutes;c__Clostridia;o__Clostridiales;f__Peptostreptococcaceae_3;g__Clostridium_3	g__Clostridium_3
94452.MaxBin.out.017	20	68	1	84.24	0.0200406	2421926	49.4	p__Firmicutes (UID241)	930	213	118	43	0	7	203	3	0	0	0	94.07	1.69	0	k__Bacteria;p__Firmicutes	p__Firmicutes
94452.MaxBin.out.018	20	68	1	83.41	0.0198432	2745852	43.6	o__Clostridiales (UID1120)	304	250	143	42	1	15	229	6	0	0	0	90.91	2.45	0	k__Bacteria;p__Firmicutes;c__Clostridia;o__Clostridiales;f__Peptostreptococcaceae_3;g__Clostridium_3	g__Clostridium_3
94452.MaxBin.out.019	20	68	1	80.14	0.0190652	2556313	53.4	p__Firmicutes (UID239)	1324	176	102	41	0	8	163	5	0	0	0	93.14	3.92	0	k__Bacteria;p__Firmicutes	p__Firmicutes
94452.MaxBin.out.020	20	68	1	77.34	0.0183991	2154830	33.2	c__Bacilli (UID285)	586	325	181	43	0	35	278	12	0	0	0	85.41	4.56	16.67	k__Bacteria;p__Firmicutes;c__Bacilli	c__Bacilli
94452.MaxBin.out.021	20	68	1	59.23	0.0140908	3566733	42	k__Archaea (UID2)	207	149	107	1	42	1	81	63	3	1	0	99.07	43.09	0	k__Archaea;p__Euryarchaeota;c__Methanobacteria;o__Methanobacteriales;f__Methanobacteriaceae;g__Methanobacterium	g__Methanobacterium
94452.MaxBin.out.022	20	68	1	46.9	0.0111575	1866261	50	o__Clostridiales (UID1120)	304	250	143	12	0	155	93	2	0	0	0	38.4	0.93	50	k__Bacteria;p__Firmicutes;c__Clostridia;o__Clostridiales;f__Peptostreptococcaceae_3;g__Clostridium_3	g__Clostridium_3
94452.MaxBin.out.023	20	68	1	30.64	0.00728923	2162713	36.6	o__Clostridiales (UID1120)	304	250	143	43	0	19	228	3	0	0	0	89.49	1.75	66.67	k__Bacteria;p__Firmicutes;c__Clostridia;o__Clostridiales	o__Clostridiales
94452.MaxBin.out.024	20	68	1	29.34	0.00697996	1931507	34.3	k__Bacteria (UID3187)	2258	180	109	40	3	1	174	5	0	0	0	99.08	1.12	0	k__Bacteria;p__Nitrospirae;c__Nitrospira;o__Nitrospirales;f__Nitrospiraceae;g__Thermodesulfovibrio	g__Thermodesulfovibrio
94452.MaxBin.out.025	20	68	1	29.08	0.00691811	1211321	30.7	root (UID1)	5656	56	24	0	0	56	0	0	0	0	0	0	0	0	NA	NA
94452.MaxBin.out.026	20	68	1	28.11	0.00668735	4151672	64.2	k__Bacteria (UID1452)	924	163	110	41	0	18	144	1	0	0	0	87.17	0.91	0	k__Bacteria;p__Chloroflexi	p__Chloroflexi
94452.MaxBin.out.027	20	68	1	27.87	0.00663025	1736028	49.4	p__Euryarchaeota (UID3)	148	188	125	41	2	0	185	3	0	0	0	100	0.18	0	k__Archaea;p__Euryarchaeota;c__Methanobacteria;o__Methanobacteriales;f__Methanobacteriaceae;g__Methanothermobacter	g__Methanothermobacter
94452.MaxBin.out.028	20	68	1	27.07	0.00643993	3028783	42.3	o__Clostridiales (UID1120)	304	250	143	43	0	7	230	12	1	0	0	95.1	6.29	6.67	k__Bacteria;p__Firmicutes;c__Clostridia;o__Clostridiales;f__Peptostreptococcaceae_3;g__Clostridium_3	g__Clostridium_3
94452.MaxBin.out.029	20	68	1	26.35	0.00626865	2038114	50.2	o__Clostridiales (UID1212)	172	263	149	42	0	11	252	0	0	0	0	94.41	0	0	k__Bacteria;p__Firmicutes;c__Clostridia;o__Clostridiales	o__Clostridiales
94452.MaxBin.out.030	20	68	1	26.11	0.00621155	2306672	42.6	o__Clostridiales (UID1120)	304	250	143	27	5	48	185	17	0	0	0	82.05	5.24	35.29	k__Bacteria;p__Firmicutes;c__Clostridia;o__Clostridiales;f__Peptostreptococcaceae_3;g__Clostridium_3	g__Clostridium_3
94452.MaxBin.out.031	20	68	1	25.08	0.00596651	3022200	41.4	p__Euryarchaeota (UID49)	95	228	153	43	0	2	225	1	0	0	0	99.18	0.65	0	k__Archaea;p__Euryarchaeota;c__Methanomicrobia;o__Methanosarcinales;f__Methanosarcinaceae	f__Methanosarcinaceae
94452.MaxBin.out.032	20	68	1	22.88	0.00544313	4041820	37.9	k__Bacteria (UID203)	5449	103	57	23	15	20	51	31	1	0	0	66.67	28.07	14.71	k__Bacteria;p__Firmicutes;c__Clostridia;o__Clostridiales	o__Clostridiales
94452.MaxBin.out.033	20	68	1	22.88	0.00544313	3790454	36.2	o__Clostridiales (UID1212)	172	262	148	23	5	70	115	66	11	0	0	70.95	38.85	0	k__Bacteria;p__Firmicutes;c__Clostridia;o__Clostridiales;f__Peptostreptococcaceae_3;g__Clostridium_3	g__Clostridium_3
94452.MaxBin.out.034	20	68	1	22.78	0.00541935	3938886	65.1	k__Bacteria (UID1452)	924	163	110	41	1	11	149	3	0	0	0	91.82	1.9	33.33	k__Bacteria;p__Chloroflexi	p__Chloroflexi
94452.MaxBin.out.035	20	68	1	18.58	0.00442017	3182253	41.8	o__Clostridiales (UID1120)	304	250	143	27	2	48	164	37	1	0	0	80.77	14.8	27.5	k__Bacteria;p__Firmicutes;c__Clostridia;o__Clostridiales;f__Peptostreptococcaceae_3;g__Clostridium_3	g__Clostridium_3
94452.MaxBin.out.036	20	68	1	18.58	0.00442017	3124688	43.9	o__Clostridiales (UID1120)	304	250	143	33	10	19	207	14	10	0	0	93.01	9.09	68.18	k__Bacteria;p__Firmicutes;c__Clostridia;o__Clostridiales;f__Peptostreptococcaceae_3;g__Clostridium_3	g__Clostridium_3
94452.MaxBin.out.037	20	68	1	16.99	0.00404191	2030969	54.7	o__Clostridiales (UID1212)	172	263	149	42	1	4	256	3	0	0	0	98.19	1.34	66.67	k__Bacteria;p__Firmicutes;c__Clostridia;o__Clostridiales	o__Clostridiales
94452.MaxBin.out.038	20	68	1	15.85	0.0037707	4557961	58.5	k__Bacteria (UID203)	5449	104	58	1	42	2	46	52	4	0	0	96.55	35.86	0	k__Bacteria;p__Firmicutes;c__Clostridia	c__Clostridia
94452.MaxBin.out.039	20	68	1	15.58	0.00370647	2341023	66.3	f__Rhodocyclaceae (UID3972)	30	540	241	42	1	14	511	15	0	0	0	96.07	2.67	6.67	k__Bacteria;p__Proteobacteria;c__Betaproteobacteria;o__Rhodocyclales;f__Rhodocyclaceae	f__Rhodocyclaceae
94452.MaxBin.out.040	20	68	1	13.91	0.00330918	1633550	50.5	k__Bacteria (UID2328)	3167	126	75	42	1	5	119	2	0	0	0	93.33	2.67	0	k__Bacteria;p__Tenericutes;c__Mollicutes	c__Mollicutes
94452.MaxBin.out.041	20	68	1	12.75	0.00303322	1964286	47.8	o__Clostridiales (UID1212)	172	263	149	34	0	40	219	4	0	0	0	84.38	1.9	0	k__Bacteria;p__Firmicutes;c__Clostridia;o__Clostridiales;f__Ruminococcaceae	f__Ruminococcaceae
94452.MaxBin.out.042	20	68	1	11.12	0.00264544	2774131	48.4	c__Clostridia (UID1085)	35	420	196	41	2	10	397	13	0	0	0	96.4	2.92	0	k__Bacteria;p__Firmicutes;c__Clostridia;o__Clostridiales_4;f__Syntrophomonadaceae	f__Syntrophomonadaceae
94452.MaxBin.out.043	20	68	1	11	0.00261689	2087886	53.8	o__Clostridiales (UID1212)	172	263	149	42	0	19	241	3	0	0	0	90.49	1.34	0	k__Bacteria;p__Firmicutes;c__Clostridia;o__Clostridiales	o__Clostridiales
94452.MaxBin.out.044	20	68	1	10.86	0.00258359	2581714	38.4	o__Clostridiales (UID1212)	172	263	149	26	4	95	141	21	6	0	0	64.25	10.97	2.56	k__Bacteria;p__Firmicutes;c__Clostridia;o__Clostridiales;f__Peptostreptococcaceae_3;g__Clostridium_3	g__Clostridium_3
94452.MaxBin.out.045	20	68	1	10.75	0.00255742	3538198	38	k__Bacteria (UID203)	5449	103	57	30	13	3	81	18	1	0	0	94.74	16.91	19.05	k__Bacteria;p__Firmicutes;c__Clostridia;o__Clostridiales	o__Clostridiales
94452.MaxBin.out.046	20	68	1	10.55	0.00250984	2546580	44.7	o__Clostridiales (UID1212)	172	263	149	43	0	29	229	5	0	0	0	85.35	2.68	0	k__Bacteria;p__Firmicutes;c__Clostridia;o__Clostridiales;f__Peptostreptococcaceae_3;g__Clostridium_3	g__Clostridium_3
94452.MaxBin.out.047	20	68	1	9.97	0.00237186	3783152	49.4	k__Bacteria (UID203)	5449	104	58	28	15	3	68	22	8	3	0	95.69	35.66	10.94	k__Bacteria;p__Firmicutes;c__Clostridia;o__Clostridiales	o__Clostridiales
94452.MaxBin.out.048	20	68	1	9.83	0.00233855	2025853	60.7	o__Clostridiales (UID1212)	172	263	149	41	0	14	246	3	0	0	0	95.43	2.01	0	k__Bacteria;p__Firmicutes;c__Clostridia;o__Clostridiales	o__Clostridiales
94452.MaxBin.out.049	20	68	1	9.45	0.00224815	3766388	41	o__Clostridiales (UID1212)	172	263	149	28	3	49	126	64	19	5	0	83.01	49.05	2.65	k__Bacteria;p__Firmicutes;c__Clostridia;o__Clostridiales;f__Peptostreptococcaceae_3;g__Clostridium_3	g__Clostridium_3
94452.MaxBin.out.050	20	68	1	9.37	0.00222912	1954440	41.2	o__Clostridiales (UID1212)	172	263	149	35	0	16	245	2	0	0	0	96.22	1.34	0	k__Bacteria;p__Firmicutes;c__Clostridia;o__Clostridiales	o__Clostridiales
94452.MaxBin.out.051	20	68	1	9.1	0.00216488	1919465	44.8	c__Clostridia (UID1085)	35	420	196	23	10	229	147	36	7	1	0	45.26	13.25	0	k__Bacteria;p__Firmicutes;c__Clostridia;o__Clostridiales_2;f__Peptococcaceae	f__Peptococcaceae
94452.MaxBin.out.052	20	68	1	8.8	0.00209351	1333116	30	k__Bacteria (UID203)	5449	103	57	5	1	84	17	2	0	0	0	25.44	1.75	0	k__Bacteria;p__Tenericutes;c__Mollicutes	c__Mollicutes
94452.MaxBin.out.053	20	68	1	8.47	0.00201501	3526872	43.7	k__Bacteria (UID203)	5449	103	57	23	16	18	54	20	11	0	0	80.21	40.51	16.98	k__Bacteria;p__Firmicutes;c__Clostridia;o__Clostridiales;f__Peptostreptococcaceae_3;g__Clostridium_3	g__Clostridium_3
94452.MaxBin.out.054	20	68	1	8.14	0.0019365	1541310	48.8	c__Clostridia (UID1118)	387	223	124	40	1	52	169	2	0	0	0	74.68	0.43	0	k__Bacteria;p__Firmicutes;c__Clostridia;o__Thermoanaerobacterales	o__Thermoanaerobacterales
94452.MaxBin.out.055	20	68	1	8.06	0.00191747	2951641	63.8	k__Bacteria (UID1452)	924	163	110	40	1	20	133	10	0	0	0	84.9	5.45	0	k__Bacteria;p__Chloroflexi	p__Chloroflexi
94452.MaxBin.out.056	20	68	1	7.36	0.00175094	3794361	35.3	o__Clostridiales (UID1120)	304	250	143	19	8	76	111	55	7	1	0	72.29	30.19	0	k__Bacteria;p__Firmicutes;c__Clostridia;o__Clostridiales;f__Peptostreptococcaceae_3;g__Clostridium_3	g__Clostridium_3
94452.MaxBin.out.057	20	68	1	6.35	0.00151066	1333398	43.1	p__Firmicutes (UID239)	1324	176	102	21	2	79	92	5	0	0	0	58.35	1.74	0	k__Bacteria;p__Firmicutes	p__Firmicutes
94452.MaxBin.out.058	20	68	1	6.32	0.00150352	1073563	61.2	k__Bacteria (UID203)	5449	104	58	18	12	39	48	16	1	0	0	53.76	6.36	5.26	k__Bacteria;p__Firmicutes;c__Clostridia	c__Clostridia
94452.MaxBin.out.059	20	68	1	6.29	0.00149639	1831900	54.1	k__Bacteria (UID203)	5449	103	57	14	13	40	38	21	4	0	0	53.67	13.24	0	k__Bacteria;p__Firmicutes;c__Clostridia;o__Clostridiales	o__Clostridiales
94453.MaxBin.out.001	20	6	1	713.57	0.312207	1045420	34.9	o__Clostridiales (UID1212)	172	263	149	17	0	146	116	1	0	0	0	45.61	0.67	0	k__Bacteria;p__Firmicutes;c__Clostridia;o__Clostridiales	o__Clostridiales
94453.MaxBin.out.002	20	6	1	197.73	0.0865123	255063	33.3	root (UID1)	5656	56	24	0	0	56	0	0	0	0	0	0	0	0	NA	NA
94453.MaxBin.out.003	20	6	1	155.45	0.0680137	1997035	45.3	o__Clostridiales (UID1212)	172	263	149	40	0	24	235	4	0	0	0	90.53	1.2	25	k__Bacteria;p__Firmicutes;c__Clostridia;o__Clostridiales	o__Clostridiales
94453.MaxBin.out.004	20	6	1	99.53	0.0435471	1531204	50.7	k__Bacteria (UID2328)	3167	126	75	43	0	2	124	0	0	0	0	97.33	0	0	k__Bacteria;p__Tenericutes;c__Mollicutes	c__Mollicutes
94453.MaxBin.out.005	20	6	1	92.95	0.0406682	1799718	32.8	o__Clostridiales (UID1120)	304	250	143	39	1	32	216	2	0	0	0	84.48	1.05	0	k__Bacteria;p__Firmicutes;c__Clostridia;o__Clostridiales	o__Clostridiales
94453.MaxBin.out.006	20	6	1	90.02	0.0393862	1428933	29.8	k__Bacteria (UID2328)	3167	126	75	43	0	1	124	1	0	0	0	99.88	0.67	100	k__Bacteria;p__Tenericutes;c__Mollicutes	c__Mollicutes
94453.MaxBin.out.007	20	6	1	84.46	0.0369536	2964112	50.4	o__Clostridiales (UID1120)	304	250	143	43	0	4	238	8	0	0	0	97.55	2.97	0	k__Bacteria;p__Firmicutes;c__Clostridia;o__Clostridiales;f__Peptostreptococcaceae_3;g__Clostridium_3	g__Clostridium_3
94453.MaxBin.out.008	20	6	1	79.3	0.0346959	3017757	41.5	p__Euryarchaeota (UID49)	95	228	153	43	0	4	223	1	0	0	0	97.88	0.65	0	k__Archaea;p__Euryarchaeota;c__Methanomicrobia;o__Methanosarcinales;f__Methanosarcinaceae	f__Methanosarcinaceae
94453.MaxBin.out.009	20	6	1	66.23	0.0289775	3333378	39.1	o__Clostridiales (UID1212)	172	263	149	43	0	1	261	1	0	0	0	99.33	0.67	0	k__Bacteria;p__Firmicutes;c__Clostridia;o__Clostridiales;f__Peptostreptococcaceae_3;g__Clostridium_3;s__Clostridium_thermocellum	s__Clostridium_thermocellum
94453.MaxBin.out.010	20	6	1	51.38	0.0224802	1979668	40	p__Euryarchaeota (UID3)	148	188	125	43	0	2	186	0	0	0	0	98.93	0	0	k__Archaea;p__Euryarchaeota;c__Methanobacteria;o__Methanobacteriales;f__Methanobacteriaceae;g__Methanobacterium	g__Methanobacterium
94453.MaxBin.out.011	20	6	1	44.63	0.0195269	2613334	40	o__Clostridiales (UID1212)	172	263	149	42	0	18	236	9	0	0	0	93.29	5.26	0	k__Bacteria;p__Firmicutes;c__Clostridia;o__Clostridiales	o__Clostridiales
94453.MaxBin.out.012	20	6	1	43.44	0.0190062	4010133	35.1	o__Clostridiales (UID1212)	172	262	148	26	0	46	202	14	0	0	0	86.97	5.29	14.29	k__Bacteria;p__Firmicutes;c__Clostridia;o__Clostridiales;f__Peptostreptococcaceae_3;g__Clostridium_3;s__Clostridium_clariflavum	s__Clostridium_clariflavum
94453.MaxBin.out.013	20	6	1	41.26	0.0180524	1551854	50	p__Euryarchaeota (UID3)	148	188	125	37	2	26	153	9	0	0	0	84.91	4.18	66.67	k__Archaea;p__Euryarchaeota;c__Methanobacteria;o__Methanobacteriales;f__Methanobacteriaceae;g__Methanothermobacter	g__Methanothermobacter
94453.MaxBin.out.014	20	6	1	32.31	0.0141365	2403421	48.5	o__Clostridiales (UID1120)	304	250	143	43	0	3	243	4	0	0	0	98.6	2.1	0	k__Bacteria;p__Firmicutes;c__Clostridia;o__Clostridiales;f__Peptostreptococcaceae_3;g__Clostridium_3	g__Clostridium_3
94453.MaxBin.out.015	20	6	1	27.12	0.0118657	2938386	41.5	o__Clostridiales (UID1212)	172	263	149	43	0	8	254	1	0	0	0	97.09	0.67	0	k__Bacteria;p__Firmicutes;c__Clostridia;o__Clostridiales	o__Clostridiales
94453.MaxBin.out.016	20	6	1	26.46	0.011577	2654460	48.8	p__Firmicutes (UID241)	930	213	118	43	0	4	206	3	0	0	0	96.61	1.69	0	k__Bacteria;p__Firmicutes	p__Firmicutes
94453.MaxBin.out.017	20	6	1	26.05	0.0113976	3778775	40.3	o__Clostridiales (UID1120)	304	250	143	39	1	14	231	5	0	0	0	94.83	2.45	0	k__Bacteria;p__Firmicutes;c__Clostridia;o__Clostridiales;f__Peptostreptococcaceae_3;g__Clostridium_3	g__Clostridium_3
94453.MaxBin.out.018	20	6	1	24.39	0.0106713	3747013	67.4	p__Firmicutes (UID239)	1324	175	101	43	0	2	172	1	0	0	0	98.02	0.03	0	k__Bacteria;p__Firmicutes;c__Clostridia_3;o__Clostridiales_3	o__Clostridiales_3
94453.MaxBin.out.019	20	6	1	23.37	0.010225	3372046	31.1	k__Bacteria (UID203)	5449	104	58	5	3	58	31	15	0	0	0	69.83	21.55	6.67	k__Bacteria;p__Firmicutes;c__Clostridia;o__Clostridiales	o__Clostridiales
94453.MaxBin.out.020	20	6	1	22.66	0.00991438	1143276	32.8	o__Clostridiales (UID1120)	304	249	142	35	0	155	94	0	0	0	0	26.06	0	0	k__Bacteria;p__Firmicutes;c__Clostridia;o__Clostridiales	o__Clostridiales
94453.MaxBin.out.021	20	6	1	21.31	0.00932371	1386555	33	o__Clostridiales (UID1120)	304	250	143	26	1	103	141	5	1	0	0	57.98	4.2	0	k__Bacteria;p__Firmicutes;c__Clostridia;o__Clostridiales	o__Clostridiales
94453.MaxBin.out.022	20	6	1	18.71	0.00818614	1581100	37.3	k__Bacteria (UID203)	5449	104	58	1	0	76	28	0	0	0	0	41.38	0	0	k__Bacteria;p__Firmicutes;c__Clostridia;o__Clostridiales	o__Clostridiales
94453.MaxBin.out.023	20	6	1	18.12	0.007928	3500101	44.6	o__Clostridiales (UID1212)	172	263	149	42	1	5	234	24	0	0	0	97.09	12.98	4.17	k__Bacteria;p__Firmicutes;c__Clostridia;o__Clostridiales;f__Peptostreptococcaceae_3;g__Clostridium_3	g__Clostridium_3
94453.MaxBin.out.024	20	6	1	17.88	0.00782299	2821204	37.6	p__Firmicutes (UID240)	1318	179	104	11	5	61	74	41	3	0	0	79.82	28.37	8	k__Bacteria;p__Firmicutes;c__Clostridia	c__Clostridia
94453.MaxBin.out.025	20	6	1	17.06	0.00746422	597552	37.7	root (UID1)	5656	56	24	0	0	54	2	0	0	0	0	8.33	0	0	NA	NA
94453.MaxBin.out.026	20	6	1	16.52	0.00722796	2093642	45.7	p__Firmicutes (UID1022)	100	295	158	43	0	11	281	3	0	0	0	94.33	1.9	66.67	k__Bacteria;p__Firmicutes;c__Clostridia	c__Clostridia
94453.MaxBin.out.027	20	6	1	16.51	0.00722358	2158417	47.7	o__Clostridiales (UID1120)	304	250	143	36	6	24	215	11	0	0	0	86.01	3.15	18.18	k__Bacteria;p__Firmicutes;c__Clostridia;o__Clostridiales;f__Peptostreptococcaceae_3;g__Clostridium_3	g__Clostridium_3
94453.MaxBin.out.028	20	6	1	16.3	0.0071317	1995005	47.6	o__Clostridiales (UID1212)	172	263	149	43	0	7	252	4	0	0	0	95.75	2.35	0	k__Bacteria;p__Firmicutes;c__Clostridia;o__Clostridiales;f__Ruminococcaceae	f__Ruminococcaceae
94453.MaxBin.out.029	20	6	1	16.25	0.00710982	2193547	42	k__Bacteria (UID203)	5449	103	58	19	23	13	52	25	13	0	0	81.03	19.81	7.81	k__Bacteria;p__Firmicutes;c__Clostridia;o__Thermoanaerobacterales;f__Thermoanaerobacteraceae	f__Thermoanaerobacteraceae
94453.MaxBin.out.030	20	6	1	16.22	0.0070967	3016091	35.2	o__Clostridiales (UID1120)	304	250	143	33	2	67	118	61	4	0	0	73.23	36.25	1.37	k__Bacteria;p__Firmicutes;c__Clostridia;o__Clostridiales	o__Clostridiales
94453.MaxBin.out.031	20	6	1	15.57	0.00681231	170976	38.2	c__Clostridia (UID1118)	387	223	124	35	0	169	54	0	0	0	0	5.65	0	0	k__Bacteria;p__Firmicutes;c__Clostridia;o__Clostridiales	o__Clostridiales
94453.MaxBin.out.032	20	6	1	15.15	0.00662854	2600521	49.3	o__Clostridiales (UID1212)	172	263	149	42	1	9	243	11	0	0	0	94.63	5.03	0	k__Bacteria;p__Firmicutes;c__Clostridia;o__Clostridiales	o__Clostridiales
94453.MaxBin.out.033	20	6	1	14.07	0.00615601	2178675	28.8	k__Bacteria (UID203)	5449	104	58	5	0	81	21	2	0	0	0	34.48	3.45	0	k__Bacteria;p__Firmicutes;c__Clostridia;o__Clostridiales	o__Clostridiales
94453.MaxBin.out.034	20	6	1	13.82	0.00604663	1980104	55.2	o__Clostridiales (UID1212)	172	263	149	36	1	39	218	6	0	0	0	80.04	1.07	33.33	k__Bacteria;p__Firmicutes;c__Clostridia;o__Clostridiales;f__Ruminococcaceae	f__Ruminococcaceae
94453.MaxBin.out.035	20	6	1	13.59	0.005946	2102103	50.2	o__Clostridiales (UID1212)	172	263	149	42	0	9	246	8	0	0	0	95.75	4.25	87.5	k__Bacteria;p__Firmicutes;c__Clostridia;o__Clostridiales	o__Clostridiales
94453.MaxBin.out.036	20	6	1	10.39	0.00454591	3081113	63.4	p__Firmicutes (UID239)	1324	175	101	42	1	12	159	4	0	0	0	92.24	3.47	25	k__Bacteria;p__Firmicutes;c__Clostridia_3;o__Clostridiales_3	o__Clostridiales_3
94453.MaxBin.out.037	20	6	1	9.02	0.0039465	5316958	42.5	k__Bacteria (UID203)	5449	103	57	22	17	8	54	33	8	0	0	90.75	41.03	36.84	k__Bacteria;p__Firmicutes;c__Clostridia;o__Clostridiales;f__Peptostreptococcaceae_3;g__Clostridium_3	g__Clostridium_3
94453.MaxBin.out.038	20	6	1	8.14	0.00356147	322612	37.3	k__Bacteria (UID203)	5449	104	58	6	0	95	9	0	0	0	0	1.41	0	0	k__Bacteria;p__Firmicutes;c__Clostridia;o__Clostridiales	o__Clostridiales
94453.MaxBin.out.039	20	6	1	7.72	0.00337771	3999024	33.9	k__Bacteria (UID203)	5449	104	58	5	4	69	24	11	0	0	0	48.59	13.79	0	k__Bacteria;p__Firmicutes;c__Clostridia;o__Clostridiales	o__Clostridiales
94453.MaxBin.out.040	20	6	1	7.35	0.00321583	1955187	61.1	o__Clostridiales (UID1212)	172	263	149	29	2	50	189	24	0	0	0	82.43	9.63	0	k__Bacteria;p__Firmicutes;c__Clostridia;o__Clostridiales	o__Clostridiales
94453.MaxBin.out.041	20	6	1	7.12	0.0031152	3825543	38	k__Bacteria (UID203)	5449	103	57	17	16	20	45	34	4	0	0	81.9	35.33	6.52	k__Bacteria;p__Firmicutes;c__Clostridia;o__Clostridiales;f__Peptostreptococcaceae_3;g__Clostridium_3	g__Clostridium_3
94453.MaxBin.out.042	20	6	1	7.08	0.0030977	5128887	42.4	o__Clostridiales (UID1120)	304	250	143	32	5	25	106	90	23	4	2	90.26	78.94	15.87	k__Bacteria;p__Firmicutes;c__Clostridia;o__Clostridiales;f__Peptostreptococcaceae_3;g__Clostridium_3	g__Clostridium_3
94453.MaxBin.out.043	20	6	1	7.03	0.00307582	3438112	48.6	k__Bacteria (UID203)	5449	104	58	21	12	21	45	36	2	0	0	81.08	42.4	71.43	k__Bacteria;p__Firmicutes;c__Clostridia;o__Clostridiales_4;f__Syntrophomonadaceae	f__Syntrophomonadaceae
94453.MaxBin.out.044	20	6	1	6.84	0.00299269	1456664	54	k__Bacteria (UID203)	5449	104	58	13	14	38	44	22	0	0	0	55.49	9.62	4.55	k__Bacteria;p__Firmicutes;c__Clostridia;o__Clostridiales	o__Clostridiales
94453.MaxBin.out.045	20	6	1	6.61	0.00289206	2190985	42.9	p__Firmicutes (UID240)	1318	179	104	20	7	86	79	12	2	0	0	48.32	6.07	11.11	k__Bacteria;p__Firmicutes;c__Clostridia	c__Clostridia
94453.MaxBin.out.046	20	6	1	6.51	0.0028483	1650703	45.9	c__Clostridia (UID1085)	35	420	196	27	7	147	219	49	5	0	0	61.5	14.83	1.56	k__Bacteria;p__Firmicutes;c__Clostridia;o__Clostridiales_2;f__Peptococcaceae	f__Peptococcaceae
94453.MaxBin.out.047	20	6	1	6.43	0.0028133	3275434	38.6	o__Clostridiales (UID1212)	172	263	149	11	2	80	108	51	23	1	0	79.81	51.44	6.35	k__Bacteria;p__Firmicutes;c__Clostridia;o__Clostridiales	o__Clostridiales
94453.MaxBin.out.048	20	6	1	5.94	0.00259891	1717708	37.6	c__Clostridia (UID1085)	35	420	196	26	3	134	235	47	4	0	0	68.01	12.81	0	k__Bacteria;p__Firmicutes;c__Clostridia;o__Clostridiales_2;f__Peptococcaceae	f__Peptococcaceae
94454.MaxBin.out.001	20	6	3	932.81	0.298096	162768	49.4	k__Bacteria (UID203)	5449	103	57	4	0	95	8	0	0	0	0	6.06	0	0	k__Bacteria;p__Firmicutes;c__Clostridia;o__Clostridiales;f__Peptostreptococcaceae_3;g__Clostridium_3	g__Clostridium_3
94454.MaxBin.out.002	20	6	3	346.17	0.110625	1849928	47.5	o__Clostridiales (UID1120)	304	250	143	26	1	62	184	4	0	0	0	81.94	1.98	0	k__Bacteria;p__Firmicutes;c__Clostridia;o__Clostridiales;f__Peptostreptococcaceae_3;g__Clostridium_3	g__Clostridium_3
94454.MaxBin.out.003	20	6	3	301.16	0.0962409	214682	37.6	root (UID1)	5656	56	24	0	0	56	0	0	0	0	0	0	0	0	NA	NA
94454.MaxBin.out.004	20	6	3	162.78	0.0520192	4175963	35.3	o__Clostridiales (UID1212)	172	262	148	31	0	28	229	5	0	0	0	93.43	2.14	80	k__Bacteria;p__Firmicutes;c__Clostridia;o__Clostridiales;f__Peptostreptococcaceae_3;g__Clostridium_3;s__Clostridium_clariflavum	s__Clostridium_clariflavum
94454.MaxBin.out.005	20	6	3	146.1	0.0466888	2227268	45.1	o__Clostridiales (UID1212)	172	263	149	41	0	11	247	5	0	0	0	94.52	1.64	40	k__Bacteria;p__Firmicutes;c__Clostridia;o__Clostridiales	o__Clostridiales
94454.MaxBin.out.006	20	6	3	132.4	0.0423107	2502694	52	o__Clostridiales (UID1120)	304	250	143	42	0	17	225	8	0	0	0	91.26	4.9	0	k__Bacteria;p__Firmicutes;c__Clostridia;o__Clostridiales;f__Peptostreptococcaceae_3;g__Clostridium_3	g__Clostridium_3
94454.MaxBin.out.007	20	6	3	118.19	0.0377697	1385512	51.2	k__Bacteria (UID2328)	3167	126	75	43	0	10	116	0	0	0	0	88	0	0	k__Bacteria;p__Tenericutes;c__Mollicutes	c__Mollicutes
94454.MaxBin.out.008	20	6	3	85.52	0.0273294	1238754	49.5	p__Euryarchaeota (UID3)	148	188	125	35	2	35	150	3	0	0	0	77.92	0.18	0	k__Archaea;p__Euryarchaeota;c__Methanobacteria;o__Methanobacteriales;f__Methanobacteriaceae;g__Methanothermobacter	g__Methanothermobacter
94454.MaxBin.out.009	20	6	3	71.2	0.0227532	3463886	39	o__Clostridiales (UID1212)	172	263	149	43	0	1	262	0	0	0	0	99.33	0	0	k__Bacteria;p__Firmicutes;c__Clostridia;o__Clostridiales;f__Peptostreptococcaceae_3;g__Clostridium_3;s__Clostridium_thermocellum	s__Clostridium_thermocellum
94454.MaxBin.out.010	20	6	3	64.1	0.0204843	3115278	41.6	p__Euryarchaeota (UID49)	95	228	153	42	1	2	221	5	0	0	0	99.18	3.27	0	k__Archaea;p__Euryarchaeota;c__Methanomicrobia;o__Methanosarcinales;f__Methanosarcinaceae	f__Methanosarcinaceae
94454.MaxBin.out.011	20	6	3	50.3	0.0160742	4098357	38	o__Clostridiales (UID1212)	172	263	149	42	1	2	243	17	1	0	0	98.66	7.61	0	k__Bacteria;p__Firmicutes;c__Clostridia;o__Clostridiales;f__Peptostreptococcaceae_3;g__Clostridium_3	g__Clostridium_3
94454.MaxBin.out.012	20	6	3	38.05	0.0121595	2373412	41.7	o__Clostridiales (UID1212)	172	263	149	24	0	79	161	23	0	0	0	75.25	10.74	4.35	k__Bacteria;p__Firmicutes;c__Clostridia;o__Clostridiales	o__Clostridiales
94454.MaxBin.out.013	20	6	3	35.24	0.0112616	1761173	36.2	o__Clostridiales (UID1120)	304	250	143	28	9	43	191	16	0	0	0	83.16	4.61	87.5	k__Bacteria;p__Firmicutes;c__Clostridia;o__Clostridiales	o__Clostridiales
94454.MaxBin.out.014	20	6	3	31.19	0.00996731	1782407	29.7	k__Bacteria (UID2328)	3167	126	75	43	0	1	125	0	0	0	0	99.88	0	0	k__Bacteria;p__Tenericutes;c__Mollicutes	c__Mollicutes
94454.MaxBin.out.015	20	6	3	30.54	0.00975959	2121680	32.6	o__Clostridiales (UID1120)	304	250	143	33	2	49	176	24	0	1	0	82.38	10.39	33.33	k__Bacteria;p__Firmicutes;c__Clostridia;o__Clostridiales	o__Clostridiales
94454.MaxBin.out.016	20	6	3	29.17	0.00932178	2335165	43.3	p__Firmicutes (UID241)	930	213	118	36	7	12	190	11	0	0	0	94.92	3.56	9.09	k__Bacteria;p__Firmicutes	p__Firmicutes
94454.MaxBin.out.017	20	6	3	27.29	0.008721	2563631	49.1	p__Firmicutes (UID241)	930	213	118	37	0	11	199	2	1	0	0	96.41	2.12	20	k__Bacteria;p__Firmicutes	p__Firmicutes
94454.MaxBin.out.018	20	6	3	26.89	0.00859317	2787325	50.6	o__Clostridiales (UID1120)	304	250	143	38	5	9	229	11	1	0	0	96.15	2.05	7.14	k__Bacteria;p__Firmicutes;c__Clostridia;o__Clostridiales;f__Peptostreptococcaceae_3;g__Clostridium_3	g__Clostridium_3
94454.MaxBin.out.019	20	6	3	24.22	0.00773992	2439046	41.7	o__Clostridiales (UID1212)	172	263	149	16	0	58	202	3	0	0	0	90.59	1.57	66.67	k__Bacteria;p__Firmicutes;c__Clostridia;o__Clostridiales	o__Clostridiales
94454.MaxBin.out.020	20	6	3	21.8	0.00696657	2017947	61.9	o__Clostridiales (UID1120)	304	250	143	43	0	8	240	2	0	0	0	96.5	1.4	0	k__Bacteria;p__Firmicutes;c__Clostridia;o__Clostridiales	o__Clostridiales
94454.MaxBin.out.021	20	6	3	21.42	0.00684513	3938890	40.5	o__Clostridiales (UID1120)	304	250	143	42	1	13	227	9	1	0	0	93.59	5.03	16.67	k__Bacteria;p__Firmicutes;c__Clostridia;o__Clostridiales;f__Peptostreptococcaceae_3;g__Clostridium_3	g__Clostridium_3
94454.MaxBin.out.022	20	6	3	21.3	0.00680679	2489133	50.5	o__Clostridiales (UID1120)	304	250	143	42	1	13	225	12	0	0	0	95.04	5.01	33.33	k__Bacteria;p__Firmicutes;c__Clostridia;o__Clostridiales;f__Peptostreptococcaceae_3;g__Clostridium_3	g__Clostridium_3
94454.MaxBin.out.023	20	6	3	20.88	0.00667257	3876017	40.3	k__Archaea (UID2)	207	149	107	1	42	3	76	65	2	2	1	97.2	46.68	0	k__Archaea;p__Euryarchaeota;c__Methanobacteria;o__Methanobacteriales;f__Methanobacteriaceae;g__Methanobacterium	g__Methanobacterium
94454.MaxBin.out.024	20	6	3	18.54	0.00592478	1268281	37.4	k__Bacteria (UID203)	5449	104	58	3	0	91	12	1	0	0	0	20.69	1.72	0	k__Bacteria;p__Firmicutes;c__Clostridia	c__Clostridia
94454.MaxBin.out.025	20	6	3	17.94	0.00573304	282397	34.8	root (UID1)	5656	56	24	0	0	55	1	0	0	0	0	4.17	0	0	NA	NA
94454.MaxBin.out.026	20	6	3	17.57	0.0056148	1634743	32.1	root (UID1)	5656	56	24	0	0	56	0	0	0	0	0	0	0	0	NA	NA
94454.MaxBin.out.027	20	6	3	16.68	0.00533038	2497341	49.5	o__Clostridiales (UID1212)	172	263	149	42	1	8	252	3	0	0	0	95.75	1.34	0	k__Bacteria;p__Firmicutes;c__Clostridia;o__Clostridiales	o__Clostridiales
94454.MaxBin.out.028	20	6	3	15.72	0.0050236	2158154	55	o__Clostridiales (UID1212)	172	263	149	43	0	21	237	5	0	0	0	89.21	1.27	60	k__Bacteria;p__Firmicutes;c__Clostridia;o__Clostridiales;f__Ruminococcaceae	f__Ruminococcaceae
94454.MaxBin.out.029	20	6	3	12.8	0.00409046	988398	35.8	k__Bacteria (UID203)	5449	104	58	4	0	82	21	1	0	0	0	32.76	1.72	0	k__Bacteria;p__Firmicutes;c__Clostridia	c__Clostridia
94454.MaxBin.out.030	20	6	3	12.71	0.0040617	2594023	48.4	c__Clostridia (UID1085)	35	420	196	43	0	5	413	2	0	0	0	97.45	0.64	0	k__Bacteria;p__Firmicutes;c__Clostridia;o__Clostridiales_4;f__Syntrophomonadaceae	f__Syntrophomonadaceae
94454.MaxBin.out.031	20	6	3	12.47	0.00398501	4011212	28.6	k__Bacteria (UID203)	5449	104	58	2	6	50	33	18	3	0	0	81.03	34.48	7.41	k__Bacteria;p__Firmicutes;c__Clostridia;o__Clostridiales;f__Peptostreptococcaceae;g__Clostridium	g__Clostridium
94454.MaxBin.out.032	20	6	3	11.77	0.00376131	1710439	38	k__Bacteria (UID203)	5449	104	58	5	0	83	20	1	0	0	0	26.65	1.72	100	k__Bacteria;p__Firmicutes;c__Clostridia;o__Clostridiales	o__Clostridiales
94454.MaxBin.out.033	20	6	3	11.74	0.00375172	135118	39	root (UID1)	5656	56	24	0	0	56	0	0	0	0	0	0	0	0	NA	NA
94454.MaxBin.out.034	20	6	3	10.95	0.00349926	360182	33.1	root (UID1)	5656	56	24	0	0	56	0	0	0	0	0	0	0	0	NA	NA
94454.MaxBin.out.035	20	6	3	10.74	0.00343215	519190	32.9	root (UID1)	5656	56	24	0	0	54	2	0	0	0	0	8.33	0	0	NA	NA
94454.MaxBin.out.036	20	6	3	10.71	0.00342257	191024	32.9	k__Bacteria (UID203)	5449	104	58	5	0	90	14	0	0	0	0	20.69	0	0	k__Bacteria;p__Firmicutes;c__Clostridia;o__Clostridiales	o__Clostridiales
94454.MaxBin.out.037	20	6	3	10.68	0.00341298	1031244	36.7	k__Bacteria (UID203)	5449	103	57	2	0	98	5	0	0	0	0	7.02	0	0	k__Bacteria;p__Firmicutes;c__Clostridia;o__Clostridiales	o__Clostridiales
94454.MaxBin.out.038	20	6	3	10.64	0.0034002	3069809	31.2	c__Clostridia (UID1118)	387	223	124	27	1	48	105	61	9	0	0	77.42	44.22	9.09	k__Bacteria;p__Firmicutes;c__Clostridia;o__Clostridiales	o__Clostridiales
94454.MaxBin.out.039	20	6	3	10.62	0.00339381	1187849	39.2	root (UID1)	5656	56	24	0	1	55	0	1	0	0	0	4.17	4.17	0	NA	NA
94454.MaxBin.out.040	20	6	3	10.41	0.0033267	3257742	42.4	k__Bacteria (UID203)	5449	103	57	18	24	3	49	51	0	0	0	94.74	42.87	5.88	k__Bacteria;p__Firmicutes;c__Clostridia;o__Clostridiales;f__Peptostreptococcaceae_3;g__Clostridium_3	g__Clostridium_3
94454.MaxBin.out.041	20	6	3	10.37	0.00331391	2031729	45.8	p__Firmicutes (UID1022)	100	295	158	43	0	12	278	5	0	0	0	94.28	1.64	0	k__Bacteria;p__Firmicutes;c__Clostridia	c__Clostridia
94454.MaxBin.out.042	20	6	3	10.33	0.00330113	2072140	50.2	o__Clostridiales (UID1212)	172	263	149	40	1	11	238	14	0	0	0	94.41	6.51	0	k__Bacteria;p__Firmicutes;c__Clostridia;o__Clostridiales	o__Clostridiales
94454.MaxBin.out.043	20	6	3	10.11	0.00323083	1227199	33.1	k__Bacteria (UID203)	5449	104	58	1	1	80	17	7	0	0	0	34.83	8.62	0	k__Bacteria;p__Firmicutes;c__Clostridia;o__Clostridiales	o__Clostridiales
94454.MaxBin.out.044	20	6	3	9.56	0.00305506	616948	36.4	k__Bacteria (UID203)	5449	104	58	9	0	80	23	1	0	0	0	18.97	1.72	100	k__Bacteria;p__Firmicutes;c__Clostridia;o__Clostridiales	o__Clostridiales
94454.MaxBin.out.045	20	6	3	9.36	0.00299115	2835187	41.5	o__Clostridiales (UID1120)	304	250	143	15	4	111	97	28	12	2	0	56.27	22.49	2.63	k__Bacteria;p__Firmicutes;c__Clostridia;o__Clostridiales;f__Peptostreptococcaceae_3;g__Clostridium_3	g__Clostridium_3
94454.MaxBin.out.046	20	6	3	9.23	0.00294961	3803174	34.8	k__Bacteria (UID203)	5449	103	57	6	1	72	24	7	0	0	0	47.37	8.77	0	k__Bacteria;p__Firmicutes;c__Clostridia;o__Clostridiales;f__Peptostreptococcaceae_3;g__Clostridium_3	g__Clostridium_3
94454.MaxBin.out.047	20	6	3	9.13	0.00291765	2408724	37.5	c__Clostridia (UID1085)	35	420	196	25	9	53	275	85	7	0	0	86.6	23.95	2.83	k__Bacteria;p__Firmicutes;c__Clostridia;o__Clostridiales_2;f__Peptococcaceae	f__Peptococcaceae
94454.MaxBin.out.048	20	6	3	9.05	0.00289209	1861068	41.5	k__Bacteria (UID203)	5449	104	58	14	19	37	35	31	1	0	0	50.37	17.1	2.94	k__Bacteria;p__Firmicutes;c__Clostridia	c__Clostridia
94454.MaxBin.out.049	20	6	3	9.01	0.0028793	3153837	47.6	c__Clostridia (UID1118)	387	223	124	35	5	45	137	36	4	1	0	76.68	22.21	1.85	k__Bacteria;p__Firmicutes;c__Clostridia;o__Thermoanaerobacterales	o__Thermoanaerobacterales
94454.MaxBin.out.050	20	6	3	8.4	0.00268437	3000015	39.4	o__Clostridiales (UID1212)	172	263	149	12	4	79	96	65	23	0	0	82.66	54.65	41.04	k__Bacteria;p__Firmicutes;c__Clostridia;o__Clostridiales	o__Clostridiales
94454.MaxBin.out.051	20	6	3	8.32	0.0026588	2252370	47.7	o__Clostridiales (UID1212)	172	263	149	39	4	18	221	24	0	0	0	90.47	8.24	0	k__Bacteria;p__Firmicutes;c__Clostridia;o__Clostridiales;f__Ruminococcaceae	f__Ruminococcaceae
94454.MaxBin.out.052	20	6	3	8.07	0.00257891	3155593	45.9	o__Clostridiales (UID1212)	172	263	149	28	3	42	195	26	0	0	0	87.14	9.95	0	k__Bacteria;p__Firmicutes;c__Clostridia;o__Clostridiales;f__Peptostreptococcaceae_3;g__Clostridium_3	g__Clostridium_3
94454.MaxBin.out.053	20	6	3	7.86	0.0025118	2311831	45.6	p__Firmicutes (UID241)	930	213	118	24	0	40	169	3	1	0	0	87.56	2.97	16.67	k__Bacteria;p__Firmicutes	p__Firmicutes
94454.MaxBin.out.054	20	6	3	7.63	0.0024383	1587758	60.8	o__Clostridiales (UID1212)	172	263	149	30	0	71	187	5	0	0	0	69.81	1.9	0	k__Bacteria;p__Firmicutes;c__Clostridia;o__Clostridiales	o__Clostridiales
94454.MaxBin.out.055	20	6	3	7.63	0.0024383	1708848	42.3	k__Bacteria (UID203)	5449	103	58	16	23	19	48	25	11	0	0	74.14	17.29	6.9	k__Bacteria;p__Firmicutes;c__Clostridia;o__Thermoanaerobacterales;f__Thermoanaerobacteraceae	f__Thermoanaerobacteraceae
94454.MaxBin.out.056	20	6	3	7.35	0.00234882	1757046	54.7	k__Bacteria (UID203)	5449	104	58	21	16	20	60	21	2	1	0	74.37	16.61	6.06	k__Bacteria;p__Firmicutes;c__Clostridia;o__Clostridiales	o__Clostridiales
94454.MaxBin.out.057	20	6	3	6.99	0.00223378	3014111	44.2	k__Bacteria (UID203)	5449	103	57	15	16	18	46	28	11	0	0	85.25	44.44	21.31	k__Bacteria;p__Firmicutes;c__Clostridia;o__Clostridiales	o__Clostridiales
94454.MaxBin.out.058	20	6	3	6.73	0.00215069	1414046	67	p__Firmicutes (UID239)	1324	175	101	22	0	98	77	0	0	0	0	39.93	0	0	k__Bacteria;p__Firmicutes;c__Clostridia_3;o__Clostridiales_3	o__Clostridiales_3
94454.MaxBin.out.059	20	6	3	6.56	0.00209636	1744515	44.5	o__Clostridiales (UID1212)	172	263	149	15	0	154	91	17	1	0	0	41.69	7.47	20	k__Bacteria;p__Firmicutes;c__Clostridia;o__Clostridiales	o__Clostridiales
94454.MaxBin.out.060	20	6	3	6.13	0.00195895	1161532	56.9	p__Firmicutes (UID239)	1324	175	101	19	1	117	49	6	2	1	0	26.99	10.89	5.56	k__Bacteria;p__Firmicutes;c__Clostridia_3;o__Clostridiales_3	o__Clostridiales_3
94458.MaxBin.out.001	20	110	1	803.1	0.153875	202816	37.3	root (UID1)	5656	56	24	0	0	56	0	0	0	0	0	0	0	0	NA	NA
94458.MaxBin.out.002	20	110	1	627.23	0.120178	2785962	50.4	k__Bacteria (UID203)	5449	103	57	23	20	10	54	29	10	0	0	85.96	39.62	5.08	k__Bacteria;p__Firmicutes;c__Clostridia;o__Clostridiales;f__Peptostreptococcaceae_3;g__Clostridium_3	g__Clostridium_3
94458.MaxBin.out.003	20	110	1	409.4	0.0784414	4258685	35.5	o__Clostridiales (UID1212)	172	262	148	39	1	11	246	5	0	0	0	95.97	2.08	40	k__Bacteria;p__Firmicutes;c__Clostridia;o__Clostridiales;f__Peptostreptococcaceae_3;g__Clostridium_3;s__Clostridium_clariflavum	s__Clostridium_clariflavum
94458.MaxBin.out.004	20	110	1	327.65	0.0627781	2328421	52.1	o__Clostridiales (UID1120)	304	250	143	41	0	26	217	7	0	0	0	88.01	2.62	0	k__Bacteria;p__Firmicutes;c__Clostridia;o__Clostridiales;f__Peptostreptococcaceae_3;g__Clostridium_3	g__Clostridium_3
94458.MaxBin.out.005	20	110	1	291.23	0.0558	2694313	33.8	o__Clostridiales (UID1212)	172	263	149	43	0	3	257	3	0	0	0	97.99	1.23	0	k__Bacteria;p__Firmicutes;c__Clostridia;o__Clostridiales	o__Clostridiales
94458.MaxBin.out.006	20	110	1	257.07	0.0492549	3287475	47.6	k__Bacteria (UID203)	5449	103	57	28	12	8	64	31	0	0	0	92.5	34.6	6.45	k__Bacteria;p__Firmicutes;c__Clostridia;o__Clostridiales;f__Peptostreptococcaceae_3;g__Clostridium_3	g__Clostridium_3
94458.MaxBin.out.007	20	110	1	253.31	0.0485344	2102612	45	o__Clostridiales (UID1212)	172	263	149	42	0	8	252	3	0	0	0	96.2	1.03	66.67	k__Bacteria;p__Firmicutes;c__Clostridia;o__Clostridiales	o__Clostridiales
94458.MaxBin.out.008	20	110	1	181.21	0.03472	1219949	44.6	k__Bacteria (UID203)	5449	102	56	39	0	12	89	1	0	0	0	86.12	0.16	100	k__Bacteria	k__Bacteria
94458.MaxBin.out.009	20	110	1	159.65	0.0305891	2154484	53.4	p__Firmicutes (UID239)	1324	176	102	41	0	12	161	3	0	0	0	91.99	2.45	0	k__Bacteria;p__Firmicutes	p__Firmicutes
94458.MaxBin.out.010	20	110	1	142.24	0.0272533	2239432	33.2	c__Bacilli (UID285)	586	325	181	43	0	36	274	13	2	0	0	84.86	6.19	21.05	k__Bacteria;p__Firmicutes;c__Bacilli	c__Bacilli
94458.MaxBin.out.011	20	110	1	131	0.0250997	2701359	44.6	o__Clostridiales (UID1212)	172	263	149	43	0	6	250	7	0	0	0	97.26	1.68	0	k__Bacteria;p__Firmicutes;c__Clostridia;o__Clostridiales	o__Clostridiales
94458.MaxBin.out.012	20	110	1	107.63	0.020622	2211160	47.7	k__Bacteria (UID209)	5443	105	59	42	1	0	104	1	0	0	0	100	1.69	0	k__Bacteria;p__Synergistetes;c__Synergistia;o__Synergistales;f__Synergistaceae	f__Synergistaceae
94458.MaxBin.out.013	20	110	1	86.01	0.0164796	2558595	49.3	p__Firmicutes (UID241)	930	213	118	43	0	8	202	3	0	0	0	93.22	1.69	0	k__Bacteria;p__Firmicutes	p__Firmicutes
94458.MaxBin.out.014	20	110	1	81.29	0.0155752	1709277	49.5	p__Euryarchaeota (UID3)	148	188	125	40	2	1	184	3	0	0	0	99.73	0.18	0	k__Archaea;p__Euryarchaeota;c__Methanobacteria;o__Methanobacteriales;f__Methanobacteriaceae;g__Methanothermobacter	g__Methanothermobacter
94458.MaxBin.out.015	20	110	1	79.31	0.0151959	2523989	41.5	o__Clostridiales (UID1212)	172	263	149	35	0	54	207	2	0	0	0	77.66	0.36	50	k__Bacteria;p__Firmicutes;c__Clostridia;o__Clostridiales	o__Clostridiales
94458.MaxBin.out.016	20	110	1	78.49	0.0150388	2786187	43.5	o__Clostridiales (UID1120)	304	250	143	41	1	19	226	5	0	0	0	91.43	2.1	0	k__Bacteria;p__Firmicutes;c__Clostridia;o__Clostridiales;f__Peptostreptococcaceae_3;g__Clostridium_3	g__Clostridium_3
94458.MaxBin.out.017	20	110	1	73.62	0.0141057	3446369	65.4	k__Bacteria (UID1452)	924	163	110	32	0	28	133	2	0	0	0	83.04	1.82	0	k__Bacteria;p__Chloroflexi	p__Chloroflexi
94458.MaxBin.out.018	20	110	1	71.6	0.0137186	1977290	39.8	p__Euryarchaeota (UID3)	148	188	125	43	0	2	186	0	0	0	0	98.93	0	0	k__Archaea;p__Euryarchaeota;c__Methanobacteria;o__Methanobacteriales;f__Methanobacteriaceae;g__Methanobacterium	g__Methanobacterium
94458.MaxBin.out.019	20	110	1	70	0.0134121	4647306	60	k__Bacteria (UID1452)	924	163	110	37	0	24	133	5	1	0	0	85.64	5.15	0	k__Bacteria;p__Chloroflexi	p__Chloroflexi
94458.MaxBin.out.020	20	110	1	59.85	0.0114673	1924978	50.5	o__Clostridiales (UID1212)	172	263	149	41	0	14	248	1	0	0	0	93.4	0.34	100	k__Bacteria;p__Firmicutes;c__Clostridia;o__Clostridiales	o__Clostridiales
94458.MaxBin.out.021	20	110	1	57.1	0.0109404	951958	55	k__Bacteria (UID203)	5449	104	58	4	0	98	6	0	0	0	0	6.03	0	0	k__Bacteria;p__Chloroflexi	p__Chloroflexi
94458.MaxBin.out.022	20	110	1	56.05	0.0107392	2436331	42.5	o__Clostridiales (UID1120)	304	250	143	43	0	6	236	8	0	0	0	96.15	3.5	0	k__Bacteria;p__Firmicutes;c__Clostridia;o__Clostridiales;f__Peptostreptococcaceae_3;g__Clostridium_3	g__Clostridium_3
94458.MaxBin.out.023	20	110	1	53.84	0.0103158	3426617	64.4	k__Bacteria (UID1452)	924	163	110	42	0	27	135	1	0	0	0	79.55	0.91	100	k__Bacteria;p__Chloroflexi	p__Chloroflexi
94458.MaxBin.out.024	20	110	1	53.28	0.0102085	4206373	37.6	o__Clostridiales (UID1212)	172	263	149	43	0	2	247	13	1	0	0	98.66	5.93	0	k__Bacteria;p__Firmicutes;c__Clostridia;o__Clostridiales;f__Peptostreptococcaceae_3;g__Clostridium_3	g__Clostridium_3
94458.MaxBin.out.025	20	110	1	49.82	0.00954556	1467771	51.1	k__Bacteria (UID2328)	3167	126	75	42	0	5	120	1	0	0	0	94.22	0.12	0	k__Bacteria;p__Tenericutes;c__Mollicutes	c__Mollicutes
94458.MaxBin.out.026	20	110	1	46.2	0.00885197	2252713	66.3	f__Rhodocyclaceae (UID3972)	30	540	241	43	0	13	526	1	0	0	0	96.13	0.21	0	k__Bacteria;p__Proteobacteria;c__Betaproteobacteria;o__Rhodocyclales;f__Rhodocyclaceae	f__Rhodocyclaceae
94458.MaxBin.out.027	20	110	1	41.08	0.00787097	2065446	36.6	o__Clostridiales (UID1120)	304	250	143	43	0	11	237	2	0	0	0	94.5	0.77	0	k__Bacteria;p__Firmicutes;c__Clostridia;o__Clostridiales	o__Clostridiales
94458.MaxBin.out.028	20	110	1	40.81	0.00781924	3419181	41.8	o__Clostridiales (UID1120)	304	250	143	42	1	14	228	8	0	0	0	93.71	3.15	0	k__Bacteria;p__Firmicutes;c__Clostridia;o__Clostridiales;f__Peptostreptococcaceae_3;g__Clostridium_3	g__Clostridium_3
94458.MaxBin.out.029	20	110	1	37.05	0.00709882	2292977	33.6	k__Bacteria (UID3187)	2258	180	109	42	0	1	172	7	0	0	0	99.95	5.05	0	k__Bacteria;p__Nitrospirae;c__Nitrospira;o__Nitrospirales;f__Nitrospiraceae;g__Thermodesulfovibrio	g__Thermodesulfovibrio
94458.MaxBin.out.030	20	110	1	32.3	0.00618871	3609461	37.3	o__Clostridiales (UID1120)	304	250	143	32	0	23	227	0	0	0	0	95.59	0	0	k__Bacteria;p__Firmicutes;c__Clostridia;o__Clostridiales	o__Clostridiales
94458.MaxBin.out.031	20	110	1	31.27	0.00599136	2178306	54.2	o__Clostridiales (UID1212)	172	263	149	42	1	7	254	2	0	0	0	96.98	1.01	100	k__Bacteria;p__Firmicutes;c__Clostridia;o__Clostridiales	o__Clostridiales
94458.MaxBin.out.032	20	110	1	28.6	0.00547979	3169646	41.3	p__Euryarchaeota (UID49)	95	228	153	43	0	2	225	1	0	0	0	99.18	0.65	0	k__Archaea;p__Euryarchaeota;c__Methanomicrobia;o__Methanosarcinales;f__Methanosarcinaceae	f__Methanosarcinaceae
94458.MaxBin.out.033	20	110	1	27.7	0.00530735	4776981	63.1	k__Bacteria (UID3187)	2258	184	114	43	0	2	181	1	0	0	0	98.25	0.88	0	k__Bacteria;p__Acidobacteria;c__Acidobacteriia;o__Acidobacteriales	o__Acidobacteriales
94458.MaxBin.out.034	20	110	1	25.31	0.00484942	2483574	57.8	p__Firmicutes (UID239)	1324	175	101	36	7	11	154	10	0	0	0	90.59	1.3	0	k__Bacteria;p__Firmicutes;c__Clostridia_3;o__Clostridiales_3	o__Clostridiales_3
94458.MaxBin.out.035	20	110	1	22.91	0.00438958	2707303	43.4	p__Firmicutes (UID241)	930	213	118	43	0	10	199	4	0	0	0	96.61	2.97	0	k__Bacteria;p__Firmicutes	p__Firmicutes
94458.MaxBin.out.036	20	110	1	19.67	0.00376879	2493441	57.7	p__Firmicutes (UID239)	1324	176	102	43	0	3	169	4	0	0	0	97.06	2.29	0	k__Bacteria;p__Firmicutes	p__Firmicutes
94458.MaxBin.out.037	20	110	1	18.45	0.00353504	2065015	60.8	o__Clostridiales (UID1212)	172	263	149	42	1	8	252	3	0	0	0	96.31	1.68	66.67	k__Bacteria;p__Firmicutes;c__Clostridia;o__Clostridiales	o__Clostridiales
94458.MaxBin.out.038	20	110	1	17.78	0.00340667	2833125	29.9	k__Bacteria (UID2328)	3167	126	75	32	0	15	110	1	0	0	0	96	1.33	0	k__Bacteria;p__Tenericutes;c__Mollicutes	c__Mollicutes
94458.MaxBin.out.039	20	110	1	17.69	0.00338942	2142448	54.1	o__Clostridiales (UID1212)	172	263	149	42	0	8	253	2	0	0	0	94.63	1.34	0	k__Bacteria;p__Firmicutes;c__Clostridia;o__Clostridiales	o__Clostridiales
94458.MaxBin.out.040	20	110	1	17.39	0.00333194	2917627	43	o__Clostridiales (UID1120)	304	250	143	42	1	6	227	16	1	0	0	97.03	7.11	21.05	k__Bacteria;p__Firmicutes;c__Clostridia;o__Clostridiales;f__Peptostreptococcaceae_3;g__Clostridium_3	g__Clostridium_3
94458.MaxBin.out.041	20	110	1	17.29	0.00331278	2078422	41.1	o__Clostridiales (UID1212)	172	263	149	41	1	2	253	8	0	0	0	98.66	3.69	0	k__Bacteria;p__Firmicutes;c__Clostridia;o__Clostridiales	o__Clostridiales
94458.MaxBin.out.042	20	110	1	15.44	0.00295832	2099962	47.7	o__Clostridiales (UID1212)	172	263	149	42	1	7	250	6	0	0	0	95.75	2.35	0	k__Bacteria;p__Firmicutes;c__Clostridia;o__Clostridiales;f__Ruminococcaceae	f__Ruminococcaceae
94458.MaxBin.out.043	20	110	1	15.38	0.00294682	2722295	48.4	c__Clostridia (UID1085)	35	420	196	43	0	7	412	1	0	0	0	96.43	0.51	0	k__Bacteria;p__Firmicutes;c__Clostridia;o__Clostridiales_4;f__Syntrophomonadaceae	f__Syntrophomonadaceae
94458.MaxBin.out.044	20	110	1	12.43	0.0023816	5762297	58.3	root (UID1)	5656	56	24	0	43	0	1	44	11	0	0	100	111.36	0	NA	NA
94458.MaxBin.out.045	20	110	1	12.25	0.00234711	2201273	40.7	c__Clostridia (UID1118)	387	223	124	43	0	4	217	2	0	0	0	97.18	1.21	50	k__Bacteria;p__Firmicutes;c__Clostridia;o__Thermoanaerobacterales	o__Thermoanaerobacterales
94458.MaxBin.out.046	20	110	1	11.96	0.00229155	3276317	38.8	k__Bacteria (UID203)	5449	103	57	26	16	4	77	20	2	0	0	94.74	11.64	11.54	k__Bacteria;p__Firmicutes;c__Clostridia;o__Clostridiales;f__Peptostreptococcaceae_3;g__Clostridium_3;s__Clostridium_thermocellum	s__Clostridium_thermocellum
94458.MaxBin.out.047	20	110	1	11.87	0.0022743	2546541	38.7	o__Clostridiales (UID1212)	172	263	149	23	2	135	109	14	1	4	0	43.47	10.74	0	k__Bacteria;p__Firmicutes;c__Clostridia;o__Clostridiales	o__Clostridiales
94458.MaxBin.out.048	20	110	1	10.31	0.00197541	3859610	44.5	k__Bacteria (UID203)	5449	103	57	26	17	12	52	29	9	1	0	83.86	54.81	14.52	k__Bacteria;p__Firmicutes;c__Clostridia;o__Clostridiales;f__Peptostreptococcaceae_3;g__Clostridium_3	g__Clostridium_3
94458.MaxBin.out.049	20	110	1	9.99	0.00191409	3375417	49	o__Clostridiales (UID1212)	172	263	149	38	5	18	222	23	0	0	0	90.04	7.1	4.35	k__Bacteria;p__Firmicutes;c__Clostridia;o__Clostridiales	o__Clostridiales
94458.MaxBin.out.050	20	110	1	9.44	0.00180871	2146125	44.7	k__Bacteria (UID203)	5449	103	57	9	18	37	33	24	2	3	4	59.65	22.73	4.55	k__Bacteria;p__Firmicutes;c__Clostridia;o__Clostridiales;f__Peptostreptococcaceae_3;g__Clostridium_3	g__Clostridium_3
94458.MaxBin.out.051	20	110	1	9.36	0.00179339	2936200	61.3	k__Bacteria (UID203)	5449	104	58	26	15	3	68	30	3	0	0	97.13	35.66	7.69	k__Bacteria;p__Firmicutes;c__Clostridia;o__Clostridiales	o__Clostridiales
94458.MaxBin.out.052	20	110	1	9.11	0.00174548	5635943	56	k__Bacteria (UID1452)	924	163	110	35	4	21	121	19	2	0	0	84.55	15.64	0	k__Bacteria;p__Chloroflexi	p__Chloroflexi
94458.MaxBin.out.053	20	110	1	8.86	0.00169758	1442781	44.8	c__Clostridia (UID1085)	35	420	196	20	4	329	81	10	0	0	0	20.58	1.52	10	k__Bacteria;p__Firmicutes;c__Clostridia;o__Clostridiales_2;f__Peptococcaceae	f__Peptococcaceae
94458.MaxBin.out.054	20	110	1	8.83	0.00169184	3669073	41.2	o__Clostridiales (UID1120)	304	250	143	12	10	71	117	49	11	2	0	77.77	31.15	9.57	k__Bacteria;p__Firmicutes;c__Clostridia;o__Clostridiales;f__Peptostreptococcaceae_3;g__Clostridium_3	g__Clostridium_3
94458.MaxBin.out.055	20	110	1	8.73	0.00167268	2541684	51.4	o__Clostridiales (UID1120)	304	247	141	37	0	37	203	7	0	0	0	84.27	4.61	14.29	k__Bacteria;p__Firmicutes;c__Clostridia;o__Clostridiales	o__Clostridiales
94458.MaxBin.out.056	20	110	1	8.32	0.00159412	2789187	34.7	k__Bacteria (UID2328)	3167	126	75	11	4	86	33	7	0	0	0	33.21	5.78	0	k__Bacteria;p__Tenericutes;c__Mollicutes	c__Mollicutes
94458.MaxBin.out.057	20	110	1	8.05	0.00154239	2082715	43.4	k__Bacteria (UID203)	5449	103	58	5	6	52	30	20	1	0	0	71	29.31	4.35	k__Bacteria;p__Firmicutes;c__Clostridia;o__Clostridiales_2;f__Peptococcaceae	f__Peptococcaceae
94458.MaxBin.out.058	20	110	1	7.82	0.00149832	1960767	40.6	k__Bacteria (UID203)	5449	104	58	4	3	68	24	10	2	0	0	53.45	19.83	12.5	k__Bacteria;p__Firmicutes;c__Clostridia	c__Clostridia
94458.MaxBin.out.059	20	110	1	7.5	0.00143701	3363068	37.4	o__Clostridiales (UID1120)	304	250	143	14	5	69	104	65	12	0	0	76.17	42.48	1.98	k__Bacteria;p__Firmicutes;c__Clostridia;o__Clostridiales;f__Peptostreptococcaceae_3;g__Clostridium_3	g__Clostridium_3
94458.MaxBin.out.060	20	110	1	6.85	0.00131247	2747722	54.8	k__Bacteria (UID203)	5449	104	58	25	15	10	51	35	8	0	0	90.91	40.02	1.69	k__Bacteria;p__Firmicutes;c__Clostridia;o__Clostridiales;f__Ruminococcaceae	f__Ruminococcaceae
94458.MaxBin.out.061	20	110	1	6.74	0.00129139	2985721	48.3	o__Clostridiales (UID1212)	172	263	149	21	9	65	107	72	12	7	0	77.72	45.53	1.33	k__Bacteria;p__Firmicutes;c__Clostridia;o__Clostridiales;f__Ruminococcaceae	f__Ruminococcaceae
94458.MaxBin.out.062	20	110	1	6.5	0.00124541	1967047	50.5	k__Bacteria (UID203)	5449	104	58	16	15	21	45	30	3	4	1	80.64	35.42	6.85	k__Bacteria;p__Firmicutes;c__Clostridia;o__Thermoanaerobacterales	o__Thermoanaerobacterales
94458.MaxBin.out.063	20	110	1	5.82	0.00111512	3165467	62.1	k__Bacteria (UID238)	2248	125	78	22	9	19	69	34	3	0	0	90.46	32.98	0	k__Bacteria	k__Bacteria
94458.MaxBin.out.064	20	110	1	5.14	0.000984829	2300889	67.4	k__Bacteria (UID203)	5449	104	58	5	3	73	23	8	0	0	0	27.95	7.9	0	k__Bacteria	k__Bacteria
