# Supplementary material for: Development and characterization of stable anaerobic thermophilic methanogenic microbiomes fermenting switchgrass at decreasing residence times
Source: Biotechnol Biofuels. 2018 Sep 6;11:243. doi: 10.1186/s13068-018-1238-1 (PMC6126044; doi:10.1186/s13068-018-1238-1)
Supplement: Supplementary file 13 — Additional file 13: Table S7. Total CAZyme domain counts normalized by number of matching bins for a species and modular CAZymes detected in the matching bins for each species. Taxon are ordered as seen in Fig. 5. [file 13068_2018_1238_MOESM13_ESM.xlsx]

## Sheet: CAZymeDomainsCountsPerSpecies
Total CAZyme domain counts normalized by number of matching bins for a species. Taxon are ordered as seen in Fig. 5.
Taxon	CBM11	CBM12	CBM13	CBM16	CBM17	CBM2	CBM20	CBM21	CBM22	CBM23	CBM25	CBM26	CBM27	CBM28	CBM3	CBM30	CBM32	CBM34	CBM35	CBM36	CBM38	CBM4	CBM40	CBM41	CBM42	CBM44	CBM46	CBM47	CBM48	CBM5	CBM50	CBM51	CBM53	CBM54	CBM57	CBM59	CBM6	CBM61	CBM62	CBM63	CBM64	CBM65	CBM66	CBM67	CBM70	CBM71	CBM8	CBM9	CE1
g__Clostridium_3	0	0	0.785714	0	0	0.928571	0	0	0.214286	0	1.71429	0	0	0	0.0714286	0	0.285714	0.642857	0	0	0	1.42857	0	0.357143	0	0	0	0	1	0	5.57143	0	0	0	0	0	0.285714	0.0714286	0.142857	0	0	0	0	0	0	0	0	0.0714286	1.21429
s__Clostridium_clariflavum	0	0	1	0.8125	0.0625	2.4375	0	0	5.0625	0	3.375	0	0	0.0625	14.9375	0	1.5	0.875	3.5	0.8125	0	0.9375	0	0	2	0.8125	0	0	0.8125	0	6.625	0	0	2.5	0	0	12.625	0	0	1.375	0	0.0625	0	0	0	0	0	7.375	3.0625
o__Clostridiales	0	0	0	0	0	0.0714286	0	0	0	0	0	0	0	0	0	0	0	0	0	0	0	0	0	0	0	0	0	0	0.857143	0	1.64286	0	0	0.0714286	0	0	1	0	1.64286	0	0	0	0.857143	0	0	0	0	0.142857	3.14286
k__Bacteria	0	0	0	0	0	0	0	0	0	0	0	0	0	0	0	0	0	0	0	0	0	0	0	0	0	0	0	0	0	0	0.3	0	0	0	0	0	0	0	0	0	0	0	0	0	0	0	0	0	0.8
g__Clostridium_3	0	0	0.0714286	0	0	0	0	0	1.21429	0	1.03571	0	0	0	0.464286	0	0	0.464286	0	0	0	0.857143	0	0.5	0	0	0	0	1.64286	0	7.5	0	0	0	0	0	0.285714	0	0.0714286	0	0	0	0	0	0	0	0	0.607143	1.89286
f__Thermotogaceae	0	0	0	0	0.25	0	1.25	0	0	0	0	0	0	0.25	0	0	0	0	0	0	0	0.5	0	0	0	0	0	0	2.5	0	3.5	0	0	0	0	0	0	0	0	0	0	0	0	0	0	0	0	1	0
o__Clostridiales	0	0	0	0	0.928571	1.71429	0	0	0.571429	0	0.0714286	0	0	0.928571	1.85714	0	0	0.928571	0.0714286	0	0	0	0	0	0.0714286	0	0	0	0.857143	0	13.2143	0	0	0.142857	0	0	0	0	0	0	0	0	0	0	0	0	0	0.714286	0
c__Bacilli	0	0	0	0	0	0	0	0	0	0	0	0	0	0	0	0	1.2	0.6	0	0	2	1.6	0	0	0	0	0	0	2	0	6.2	0	0	0	0	0	0.4	0	0	0	0	0	0	0	0	0	0	0.2	0
c__Mollicutes	0	0	0	0	0	0	0	0	0	0	0	0	0	0	0	0	0	0.416667	0	0	0	0	0	0.583333	0	0	0	0	0.5	0	7.33333	0	0	0	0	0	0	0.833333	0	0	0	0	0	0	0	0	0	0	0
g__Clostridium_3	1	0	1	0	0	0	0	0	3	0	3.14286	0	0	0	22.7143	1	1	1.14286	6.57143	0	0	7.28571	0	0	2	1	0	0	1	0	18	0	0	1.42857	0	0	12.7143	0	0.714286	1	0	0	0	0	0	0	0	1.14286	2.28571
o__Thermoanaerobacterales	0	0	0	0	0	0	0	0	0	0	0	0	0	0	1	0	1	2	0	0	0	0	0	0	0	0	0	0	1	0	3.36364	0	0	0	0	0	1.09091	0	0	0	1.36364	0	0	0	0	0	0	0	0
s__Clostridium_thermocellum	1	0	1.28571	1.42857	0	0	0	0	3.57143	0	2.85714	0	0	0	25.1429	1	0.857143	1	5	0	0	4.85714	0	0.142857	1.71429	1	0	0	1.85714	0	12.5714	0	0	0.714286	0	0	8.57143	0	0.428571	0	0	0	0	0	0	0	0	0	2.42857
o__Clostridiales	0	0	1.08333	0	0.0833333	0	0	0	0.333333	0	0.0833333	0	0	0.0833333	0.0833333	0	0.25	0.5	1.16667	0	0	0.0833333	0	0.166667	0	0	0	0	0.166667	0	16.75	0	0	0.0833333	0	0	2.83333	0.833333	0.166667	0	0.166667	1	0	0	0	0	0	0.5	1.66667
g__Methanothermobacter	0	0	0	0	0	0	0	0	0	0	0	0	0	0	0	0	0	0	0	0	0	0	0	0	0	0	0	0	0	0	0	0	0	0	0	0	0	0	0	0	0	0	0	0	0	0	0	0	0
o__Clostridiales	0	0	2.0625	0	0	0	0	0	0	0	0	0	0	0	0.1875	0	0	0	0.25	0	0	0.625	0	0	0	0	0	0	0.0625	0	14.6875	0	0	0	0	0	4.3125	0	0.9375	0	0	0	0	0	0	0	0	2.8125	4.9375
g__Clostridium_3	0	0	0.863636	0.136364	0.0909091	0.181818	0	0	3.59091	0	1.04545	0	0	0.0909091	0.0909091	0	0.409091	0.454545	0.227273	0	0	0	0	0.136364	0	0	0	0	1.04545	0	6	0	0	0.5	0	0	1	0.0909091	0	0	0	0	1	0	0	0	0	2.13636	1.63636
o__Clostridiales	0	0	0	0	0	0	0	0	0	0	0	0	0	0	0	0	0	0	0	0	0	0.0555556	0	0	0	0	0	0	0	0	10.1111	0	0	0	0	0	0.111111	0	0	0	0	0	0	0	0	0	0	0.0555556	0.0555556
p__Firmicutes	0	0	0	0	0	0	0	0	0	0	3	0	0	0	1.1875	0	0.125	0.125	0	0	0	0	0	0	0	0	0	0	0	0	25.3125	0	0	0	0	0	0	0	0	0	0	0	2.1875	0	0	0	0	0	0.0625
o__Clostridiales	0	0	0	0	0	0	0	0	0	0	0	0	0	0	0	0	2.73333	0	0	0	0	0	0	0	0	0	0	0	0	0	15.8	0	0	0.0666667	0	0	0	0	0	0	0	0	0	0	0	0	0	0	0.933333
o__Thermoanaerobacterales	0	0	0	0	0	0	0	0	0.111111	0	0.666667	0	0	0	0	0	0.333333	0.777778	0	0	0	0.222222	0	0	0	0	0	0	1.22222	0	11.1111	0	0	0.111111	0	0	0	0	0	0	0.333333	0	0	0	0	0	0	0.777778	0.111111
p__Firmicutes	0	0	0	0	0	0	0	0	0	0	1.83333	0	0	0	0	0	0	0.833333	0	0	0	0	0	0	0	0	0	0	1	0	11	0	0	0	0	0	0	0	0	0	0	0	0	0	0	0	0	1	0.166667
f__Methanosarcinaceae	0	0	0	0	0	0	0	0	0	0	0.166667	0	0	0	0.166667	0	0	0.0833333	0	0	0	0	0	0.0833333	0	0	0	0	0.0833333	0	0.333333	0	0	0	0	0	0	0	0	0	0	0	0	0	0	0	0	0	0
g__Methanobacterium	0	0	0	0	0	0	0	0	0	0	0	0	0	0	0	0	0	0	0	0	0	0	0	0	0	0	0	0	0	0	0	0	0	0	0	0	0	0	0	0	0	0	0	0	0	0	0	0	0
g__Clostridium_3	0	0	0	0	0	0	0	0	0	0	2.5	0	0	0	0	0	0.5	0.875	0	0	0	0.625	0	0	0	0	0	0	0.75	0	17.5	0	0	0.625	0	0	0	0	0	0	0	0	0	0	0	0	0	1.75	0.25
o__Clostridiales	0	0	1	4.2	0	0.4	0	0	3	0	0	0	0	0	0	0	4	0	10.4	0	0.8	4.6	0	0	0	0	0	0	0	0	15.8	0	0	0	0	0	1	0	0	0	0	0	0.2	0.4	0	0	0	7.4	0.8
p__Firmicutes	0	0	0	0	0	0	0	0	8.33333	0	0	0	0	0	0.25	0.0833333	7.83333	0	1.75	0	0	0.0833333	0.25	0	0	0	0	0	1.91667	0	13.5	1.08333	0	0.333333	0	0	7.83333	0.166667	0	0	0.25	0	0	0	0	0	0	1.41667	2.16667
o__Clostridiales	0	0	12.8462	0	0	0	0	0	0	0	0	0	0	0	0	0	14.0769	0	6.38462	0	0	0	0	0	2.07692	0	0	0	0	0	0.461538	0	0	0	0	0	1.92308	0	2.07692	0	0	0	1	0	0	0	0	0	0
o__Clostridiales	0	0.0769231	0	0	0	0	0	0	0	0	0	0	0	0	0	0	0.0769231	0	0	0	0	0	0	0	0	0	0	0	0.0769231	0	5.38462	0	0	0.538462	0	0	0	0	0	0	0	0	0	0	0	0	0	0	0.153846
p__Firmicutes	0	0	2.25	0	0	0	0	0	0	0	1	0	0	0	0	0	0.5	1.25	3	0	0	0	0	0	0	0	0	0	0	0	19	0	0	0.75	0	0	1	0	0	0	0	0	1	0.5	0	0	0	3.25	1.25
f__Ruminococcaceae	0	0	0	0	0	0	0	0	0	0	0	0	0	0	0	0	0	0	0.666667	0	0	0	0	0	0	0	0	0	0.833333	0	3.33333	0	0	0.0833333	0	0	0	0	0	0	0	0	0	0	0	0	0	0.25	0
g__Thermodesulfovibrio	0	0	0	0	0	0	0	0	1.14286	0	0.142857	0	0	0	0	0	0	0	0	0	0	0	0	0	0	0	0	0	2	0	3.42857	0	0	0	0	0	0	0	0	0	0	0	0	0	0	0	0	1.42857	0
o__Clostridiales	0	0	0	0	0	0	0	0	0	0	0	0.166667	0	0	0	0	2.5	0	0	0	0	0.333333	0	0.166667	0	0	0	0	0.5	0	11.1667	0	0	0.166667	0	0	0.5	0	0	0	0	0	0	0.166667	0	0	0	0.333333	4.16667
o__Acidobacteriales	0	0.111111	0	0	0	0	0	0	0	0	0	0	0	0	0	0	0.888889	0	0	0	0	0	0	0	0	0	0	0	3.33333	0	2.22222	0	0	0	8.44444	0	0	0	0	0	0	0	0	1	0	0	0	1.33333	3.66667
f__Ruminococcaceae	0	0.166667	0	0	0	0	0	0	0	0	0	0	0	0	0	0	0	0	0	0	0	0	0	0	0	0	0	0	1.16667	0	3.83333	0	0	0.666667	0	0	0	0	0	0	0	0	0	0	0	0	0	0	0.666667
o__Clostridiales	0	0	0	0	0	0	0	0	0	0	0	0	0	0	0	0	0	0	0	0	0	0	0	0	0	0	0	0	0	0	4.73333	0	0	1.26667	0	0	0	0	0	0	0	0	0	0	0	0	0	0	0
f__Rhodocyclaceae	0	0	0	0	0	0	0	0	0	0	0	0	0	0	0	0	0	0	0	0	0	0	0	0	0	0	0	0	0.428571	0	2.42857	0	0	0	0	0	0	0	0	0	0	0	0	0	0	0	0	0.285714	0.142857
k__Bacteria	0	0	0	0	0	0	0	0	0	0	0	0	0	0	0	0	0	0	0	0	0	0	0	0	0	0	0	0	2.57143	0	4	0	0	0	0	0	0	0	0	0	0	0	0	0	0	0	0	0.571429	0.857143
o__Clostridiales	0	0	0	0	0	0	0	0	0	0	0	0	0	0	0	0	6.22222	0	0	0	0	0	0	0	0	0	0	0	0	0	2	0	0	0.555556	0	0	0	0	1.66667	0	0	0	0	0.555556	0	0	0	2.55556	1.77778
f__Syntrophomonadaceae	0	0	0.111111	0	0	0	0.222222	0	0.222222	0	1.11111	0.333333	0	0	0	0	1.77778	0	0	0	0	0.666667	0	0	0	0	0	0	0.444444	0	4.66667	0	0	1	0	0	0.666667	0	0	0	0	0	0	0	0	0	0	0.222222	0.111111
f__Synergistaceae	0	0	0	0	0	0	0	0	0	0	0	0	0	0	0	0	0	0	0	0	0	0	0	0	0	0	0	0	0.888889	0	2.55556	0	0	0	0	0	0	0	0	0	0	0	0	0	0	0	0	0.111111	0.111111
g__Clostridium_3	0	0	0.125	0	0	0	1	0	2	0	1	0	0	0	0.125	0	0	1.375	0	0	0	0	0	0.125	0	0	0	0	1.125	0	8.75	0	0	0	0	0	0.125	0	0.125	0	0	0	0	0	0	0	0	3.125	0.375
p__Firmicutes	0	0	0	0	0	0	0	0	7.57143	0	0	0	0	0	0	0	1.85714	0.285714	0	0	0	0	0	0.285714	0	0	0	0	1.42857	0	15.1429	1	0	0	0	0	9.28571	0	0	0	0	0	1	0	0	0	0	2	1.42857
c__Mollicutes	0	0	0	0	0	0	0	0	0	0	0	0	0	0	0	0	0	0	0	0	0	1	0	0	0	0	0	0	1	0	6	0	0	0	0	0	0	0	0	0	0	0	0	0	0	0	0	0	0
p__Chloroflexi	0	0	0	0	0	0	0.142857	0	0	0	0	0	0	0	0	0	0	1	0	0	0	0	0	0	0	0	0	0	1	0	29.4286	0	0	0	0	0	0	1.71429	0	0	0	0	0	0	0	0	0	1.85714	1
p__Chloroflexi	0	0	0	0.5	0	0	0	0	0	0	0	0	0	0	0	0	0	0	0	0	0	0	0	0	0	0	0	0	2.33333	0	32.5	0	0	0	0.5	0	0	0	0	0	0	0	0	0	0	0	0	1	3
g__Clostridium_3	0	0	0.2	0	0.6	0	0	0	0.8	0	0	0	0	0.6	0.2	0	0.4	0	0	0	0	0	0	0	0	0	0	0	0	0	13	0	0	0	0	0	1.4	0	0.2	0	0	0	0.2	0	0	0	0	0.6	3.4
p__Chloroflexi	0	0	0	0	0	0	1	0	0	0	0	0	0	0	0	0	0	1	0.428571	0	0	0	0	0	1	0	0	0	1.85714	0	30.7143	0	0	0	0	0	0	0	0	0	0	0	0	0	0	0	0	2.42857	4
o__Clostridiales_3	0	0	0	0	0	0	0	0	0	0	0	0	0	0	0	0	0	0	0	0	0	0	0	0	0	0	0	0	0	0	6	0	0	0	0	0	0	0	0	0	0	0	0	0	0	0	0	0	0
Unique CAZyme domains detected per species. Taxon are ordered as seen in Fig. 5.
Taxon	CBM11	CBM12	CBM13	CBM16	CBM17	CBM2	CBM20	CBM21	CBM22	CBM23	CBM25	CBM26	CBM27	CBM28	CBM3	CBM30	CBM32	CBM34	CBM35	CBM36	CBM38	CBM4	CBM40	CBM41	CBM42	CBM44	CBM46	CBM47	CBM48	CBM5	CBM50	CBM51	CBM53	CBM54	CBM57	CBM59	CBM6	CBM61	CBM62	CBM63	CBM64	CBM65	CBM66	CBM67	CBM70	CBM71	CBM8	CBM9	CE1
g__Clostridium_3	0	0	1	0	0	1	0	0	0	0	1	0	0	0	0	0	0	1	0	0	0	1	0	0	0	0	0	0	1	0	1	0	0	0	0	0	0	0	0	0	0	0	0	0	0	0	0	0	1
s__Clostridium_clariflavum	0	0	1	1	0	1	0	0	1	0	1	0	0	0	1	0	1	1	1	1	0	1	0	0	1	1	0	0	1	0	1	0	0	1	0	0	1	0	0	1	0	0	0	0	0	0	0	1	1
o__Clostridiales	0	0	0	0	0	0	0	0	0	0	0	0	0	0	0	0	0	0	0	0	0	0	0	0	0	0	0	0	1	0	1	0	0	0	0	0	1	0	1	0	0	0	1	0	0	0	0	0	1
k__Bacteria	0	0	0	0	0	0	0	0	0	0	0	0	0	0	0	0	0	0	0	0	0	0	0	0	0	0	0	0	0	0	0	0	0	0	0	0	0	0	0	0	0	0	0	0	0	0	0	0	1
g__Clostridium_3	0	0	0	0	0	0	0	0	1	0	1	0	0	0	0	0	0	0	0	0	0	1	0	1	0	0	0	0	1	0	1	0	0	0	0	0	0	0	0	0	0	0	0	0	0	0	0	1	1
f__Thermotogaceae	0	0	0	0	0	0	1	0	0	0	0	0	0	0	0	0	0	0	0	0	0	1	0	0	0	0	0	0	1	0	1	0	0	0	0	0	0	0	0	0	0	0	0	0	0	0	0	1	0
o__Clostridiales	0	0	0	0	1	1	0	0	1	0	0	0	0	1	1	0	0	1	0	0	0	0	0	0	0	0	0	0	1	0	1	0	0	0	0	0	0	0	0	0	0	0	0	0	0	0	0	1	0
c__Bacilli	0	0	0	0	0	0	0	0	0	0	0	0	0	0	0	0	1	1	0	0	1	1	0	0	0	0	0	0	1	0	1	0	0	0	0	0	0	0	0	0	0	0	0	0	0	0	0	0	0
c__Mollicutes	0	0	0	0	0	0	0	0	0	0	0	0	0	0	0	0	0	0	0	0	0	0	0	1	0	0	0	0	1	0	1	0	0	0	0	0	0	1	0	0	0	0	0	0	0	0	0	0	0
g__Clostridium_3	1	0	1	0	0	0	0	0	1	0	1	0	0	0	1	1	1	1	1	0	0	1	0	0	1	1	0	0	1	0	1	0	0	1	0	0	1	0	1	1	0	0	0	0	0	0	0	1	1
o__Thermoanaerobacterales	0	0	0	0	0	0	0	0	0	0	0	0	0	0	1	0	1	1	0	0	0	0	0	0	0	0	0	0	1	0	1	0	0	0	0	0	1	0	0	0	1	0	0	0	0	0	0	0	0
s__Clostridium_thermocellum	1	0	1	1	0	0	0	0	1	0	1	0	0	0	1	1	1	1	1	0	0	1	0	0	1	1	0	0	1	0	1	0	0	1	0	0	1	0	0	0	0	0	0	0	0	0	0	0	1
o__Clostridiales	0	0	1	0	0	0	0	0	0	0	0	0	0	0	0	0	0	1	1	0	0	0	0	0	0	0	0	0	0	0	1	0	0	0	0	0	1	1	0	0	0	1	0	0	0	0	0	1	1
g__Methanothermobacter	0	0	0	0	0	0	0	0	0	0	0	0	0	0	0	0	0	0	0	0	0	0	0	0	0	0	0	0	0	0	0	0	0	0	0	0	0	0	0	0	0	0	0	0	0	0	0	0	0
o__Clostridiales	0	0	1	0	0	0	0	0	0	0	0	0	0	0	0	0	0	0	0	0	0	1	0	0	0	0	0	0	0	0	1	0	0	0	0	0	1	0	1	0	0	0	0	0	0	0	0	1	1
g__Clostridium_3	0	0	1	0	0	0	0	0	1	0	1	0	0	0	0	0	0	0	0	0	0	0	0	0	0	0	0	0	1	0	1	0	0	1	0	0	1	0	0	0	0	0	1	0	0	0	0	1	1
o__Clostridiales	0	0	0	0	0	0	0	0	0	0	0	0	0	0	0	0	0	0	0	0	0	0	0	0	0	0	0	0	0	0	1	0	0	0	0	0	0	0	0	0	0	0	0	0	0	0	0	0	0
p__Firmicutes	0	0	0	0	0	0	0	0	0	0	1	0	0	0	1	0	0	0	0	0	0	0	0	0	0	0	0	0	0	0	1	0	0	0	0	0	0	0	0	0	0	0	1	0	0	0	0	0	0
o__Clostridiales	0	0	0	0	0	0	0	0	0	0	0	0	0	0	0	0	1	0	0	0	0	0	0	0	0	0	0	0	0	0	1	0	0	0	0	0	0	0	0	0	0	0	0	0	0	0	0	0	1
o__Thermoanaerobacterales	0	0	0	0	0	0	0	0	0	0	1	0	0	0	0	0	0	1	0	0	0	0	0	0	0	0	0	0	1	0	1	0	0	0	0	0	0	0	0	0	0	0	0	0	0	0	0	1	0
p__Firmicutes	0	0	0	0	0	0	0	0	0	0	1	0	0	0	0	0	0	1	0	0	0	0	0	0	0	0	0	0	1	0	1	0	0	0	0	0	0	0	0	0	0	0	0	0	0	0	0	1	0
f__Methanosarcinaceae	0	0	0	0	0	0	0	0	0	0	0	0	0	0	0	0	0	0	0	0	0	0	0	0	0	0	0	0	0	0	0	0	0	0	0	0	0	0	0	0	0	0	0	0	0	0	0	0	0
g__Methanobacterium	0	0	0	0	0	0	0	0	0	0	0	0	0	0	0	0	0	0	0	0	0	0	0	0	0	0	0	0	0	0	0	0	0	0	0	0	0	0	0	0	0	0	0	0	0	0	0	0	0
g__Clostridium_3	0	0	0	0	0	0	0	0	0	0	1	0	0	0	0	0	1	1	0	0	0	1	0	0	0	0	0	0	1	0	1	0	0	1	0	0	0	0	0	0	0	0	0	0	0	0	0	1	0
o__Clostridiales	0	0	1	1	0	0	0	0	1	0	0	0	0	0	0	0	1	0	1	0	1	1	0	0	0	0	0	0	0	0	1	0	0	0	0	0	1	0	0	0	0	0	0	0	0	0	0	1	1
p__Firmicutes	0	0	0	0	0	0	0	0	1	0	0	0	0	0	0	0	1	0	1	0	0	0	0	0	0	0	0	0	1	0	1	1	0	0	0	0	1	0	0	0	0	0	0	0	0	0	0	1	1
o__Clostridiales	0	0	1	0	0	0	0	0	0	0	0	0	0	0	0	0	1	0	1	0	0	0	0	0	1	0	0	0	0	0	0	0	0	0	0	0	1	0	1	0	0	0	1	0	0	0	0	0	0
o__Clostridiales	0	0	0	0	0	0	0	0	0	0	0	0	0	0	0	0	0	0	0	0	0	0	0	0	0	0	0	0	0	0	1	0	0	1	0	0	0	0	0	0	0	0	0	0	0	0	0	0	0
p__Firmicutes	0	0	1	0	0	0	0	0	0	0	1	0	0	0	0	0	1	1	1	0	0	0	0	0	0	0	0	0	0	0	1	0	0	1	0	0	1	0	0	0	0	0	1	1	0	0	0	1	1
f__Ruminococcaceae	0	0	0	0	0	0	0	0	0	0	0	0	0	0	0	0	0	0	1	0	0	0	0	0	0	0	0	0	1	0	1	0	0	0	0	0	0	0	0	0	0	0	0	0	0	0	0	0	0
g__Thermodesulfovibrio	0	0	0	0	0	0	0	0	1	0	0	0	0	0	0	0	0	0	0	0	0	0	0	0	0	0	0	0	1	0	1	0	0	0	0	0	0	0	0	0	0	0	0	0	0	0	0	1	0
o__Clostridiales	0	0	0	0	0	0	0	0	0	0	0	0	0	0	0	0	1	0	0	0	0	0	0	0	0	0	0	0	1	0	1	0	0	0	0	0	1	0	0	0	0	0	0	0	0	0	0	0	1
o__Acidobacteriales	0	0	0	0	0	0	0	0	0	0	0	0	0	0	0	0	1	0	0	0	0	0	0	0	0	0	0	0	1	0	1	0	0	0	1	0	0	0	0	0	0	0	0	1	0	0	0	1	1
f__Ruminococcaceae	0	0	0	0	0	0	0	0	0	0	0	0	0	0	0	0	0	0	0	0	0	0	0	0	0	0	0	0	1	0	1	0	0	1	0	0	0	0	0	0	0	0	0	0	0	0	0	0	1
o__Clostridiales	0	0	0	0	0	0	0	0	0	0	0	0	0	0	0	0	0	0	0	0	0	0	0	0	0	0	0	0	0	0	1	0	0	1	0	0	0	0	0	0	0	0	0	0	0	0	0	0	0
f__Rhodocyclaceae	0	0	0	0	0	0	0	0	0	0	0	0	0	0	0	0	0	0	0	0	0	0	0	0	0	0	0	0	0	0	1	0	0	0	0	0	0	0	0	0	0	0	0	0	0	0	0	0	0
k__Bacteria	0	0	0	0	0	0	0	0	0	0	0	0	0	0	0	0	0	0	0	0	0	0	0	0	0	0	0	0	1	0	1	0	0	0	0	0	0	0	0	0	0	0	0	0	0	0	0	1	1
o__Clostridiales	0	0	0	0	0	0	0	0	0	0	0	0	0	0	0	0	1	0	0	0	0	0	0	0	0	0	0	0	0	0	1	0	0	1	0	0	0	0	1	0	0	0	0	1	0	0	0	1	1
f__Syntrophomonadaceae	0	0	0	0	0	0	0	0	0	0	1	0	0	0	0	0	1	0	0	0	0	1	0	0	0	0	0	0	0	0	1	0	0	1	0	0	1	0	0	0	0	0	0	0	0	0	0	0	0
f__Synergistaceae	0	0	0	0	0	0	0	0	0	0	0	0	0	0	0	0	0	0	0	0	0	0	0	0	0	0	0	0	1	0	1	0	0	0	0	0	0	0	0	0	0	0	0	0	0	0	0	0	0
g__Clostridium_3	0	0	0	0	0	0	1	0	1	0	1	0	0	0	0	0	0	1	0	0	0	0	0	0	0	0	0	0	1	0	1	0	0	0	0	0	0	0	0	0	0	0	0	0	0	0	0	1	0
p__Firmicutes	0	0	0	0	0	0	0	0	1	0	0	0	0	0	0	0	1	0	0	0	0	0	0	0	0	0	0	0	1	0	1	1	0	0	0	0	1	0	0	0	0	0	1	0	0	0	0	1	1
c__Mollicutes	0	0	0	0	0	0	0	0	0	0	0	0	0	0	0	0	0	0	0	0	0	1	0	0	0	0	0	0	1	0	1	0	0	0	0	0	0	0	0	0	0	0	0	0	0	0	0	0	0
p__Chloroflexi	0	0	0	0	0	0	0	0	0	0	0	0	0	0	0	0	0	1	0	0	0	0	0	0	0	0	0	0	1	0	1	0	0	0	0	0	0	1	0	0	0	0	0	0	0	0	0	1	1
p__Chloroflexi	0	0	0	1	0	0	0	0	0	0	0	0	0	0	0	0	0	0	0	0	0	0	0	0	0	0	0	0	1	0	1	0	0	0	1	0	0	0	0	0	0	0	0	0	0	0	0	1	1
g__Clostridium_3	0	0	0	0	1	0	0	0	1	0	0	0	0	1	0	0	0	0	0	0	0	0	0	0	0	0	0	0	0	0	1	0	0	0	0	0	1	0	0	0	0	0	0	0	0	0	0	1	1
p__Chloroflexi	0	0	0	0	0	0	1	0	0	0	0	0	0	0	0	0	0	1	0	0	0	0	0	0	1	0	0	0	1	0	1	0	0	0	0	0	0	0	0	0	0	0	0	0	0	0	0	1	1
o__Clostridiales_3	0	0	0	0	0	0	0	0	0	0	0	0	0	0	0	0	0	0	0	0	0	0	0	0	0	0	0	0	0	0	1	0	0	0	0	0	0	0	0	0	0	0	0	0	0	0	0	0	0
[truncated: 217 more columns]

## Sheet: ModularCAZymesPerSpecies
Modular CAZymes detected in the matching bins for each species. Taxon are ordered as seen in Fig. 5.
g__Clostridium_3	s__Clostridium_clariflavum	o__Clostridiales	k__Bacteria	g__Clostridium_3	f__Thermotogaceae	o__Clostridiales	c__Bacilli	c__Mollicutes	g__Clostridium_3	o__Thermoanaerobacterales	s__Clostridium_thermocellum	o__Clostridiales	g__Methanothermobacter	o__Clostridiales	g__Clostridium_3	o__Clostridiales	p__Firmicutes	o__Clostridiales	o__Thermoanaerobacterales	p__Firmicutes	f__Methanosarcinaceae	g__Methanobacterium	g__Clostridium_3	o__Clostridiales	p__Firmicutes	o__Clostridiales	o__Clostridiales	p__Firmicutes	f__Ruminococcaceae	g__Thermodesulfovibrio	o__Clostridiales	o__Acidobacteriales	f__Ruminococcaceae	o__Clostridiales	f__Rhodocyclaceae	k__Bacteria	o__Clostridiales	f__Syntrophomonadaceae	f__Synergistaceae	g__Clostridium_3	p__Firmicutes	c__Mollicutes	p__Chloroflexi	p__Chloroflexi	g__Clostridium_3	p__Chloroflexi	o__Clostridiales_3
CBM4-GH9	GH43-CBM42-DOC	GH43-CBM6	GT4-GT4	CBM48-GH13_14	CBM48-GH13_11	CBM50-GH18	CBM4-CBM4-CBM4-CBM4	CBM50-CBM50-CBM50	CBM3-GH5_1	CBM34-GH13_39	CBM22-GH10-DOC	GH43-CBM6	GT2-GT1	GT4-GT4	GH30-CBM22	GT84-GH94	CBM50-CBM50-CBM50-GH18	CBM50-CBM50-CBM50-CBM50-CBM50-CBM50-CBM50	CBM34-GH13_39	CBM34-GH13_20	GT4-GT4	GT2-GT1	CBM50-CBM50	CBM6-GH87	CBM22-GH10-CBM32	GH51-CBM32-CBM66	GT84-GH94	PL1-CE8	GT84-GH94	GH23-CBM50	GT84-GH94	CBM48-GH13_9	GT84-GH94	CBM50-CBM50-GH18	GH17-GT2	CBM48-GH13_9	GT84-GH94	GT2-GT2	CBM48-GH13_9	CBM34-GH13_21	CBM50-CBM50-CBM50	CBM50-CBM50	GT2-GT4	CBM50-CBM50-CBM50	CBM50-CBM50-GH18	CBM50-CBM50	CBM50-CBM50
GH39-CBM13	CBM6-CBM3-CBM6-CBM6-CBM6	GT84-GH94	GT2-GT4	CBM50-CBM50-GH18	CBM50-CBM50	CBM2-GH5_1	CBM38-CBM38-CBM38-CBM38	CBM34-GH13_20	GH30_8-CBM6	CBM48-GH13_9	GH9-CBM3-DOC	CBM50-CBM50-GH18		CBM9-CE15	CBM50-CBM50-GH18	CBM50-CBM50-CBM50	CBM50-CBM50-CBM50	GT84-GH94	CBM48-GH13_9	GT4-GT4	CBM41-CBM48-GH13_14		CBM50-CBM50-CBM50	GH43-CBM35-CBM35-CBM35-CBM13	CBM32-GH95	CBM13-CBM13	GH24-GH25	GH43-CBM13	GH27-CBM35	CBM48-GH13_10	CBM50-CBM50	CBM57-CBM57	CBM50-CBM50-GH18	GT84-GH94	GT2-GT2-GT4	CBM50-CBM50-CBM50-CBM50	CBM50-GH18	GT2-GH130	GT2-GT83	GH13_2-CBM20	CBM48-GH13_14	CBM48-GH13_9	CBM50-CBM50	CBM50-CBM50-CBM50-CBM50	CBM50-CBM50-CBM50-CBM50	CBM50-CBM50-CBM50	GH13_39-GH77
CBM50-CBM50-GH18	CBM6-CBM6-CBM6-CBM6	CBM48-GH13_9		CBM50-CBM50-CBM50	CBM48-GH13_9	CBM48-GH13_9	CBM50-CBM50-CBM50	CBM41-CBM48-GH13_14	GH43-CBM6-CBM6-DOC	CBM32-GH87	DOC-GH124	CBM50-CBM50		CE1-CE1	GH28-CBM32	CBM50-CBM50-CBM50-CBM50	CBM50-CBM50-CBM50-CBM50-CBM50	GH25-DOC	CBM50-CBM50	CBM50-CBM50	CBM34-GH13_20		GH51-GH43	CBM35-CBM35	GH10-CBM32	GT84-GH94	CBM50-CBM50-GH18	CBM50-CBM50-CBM50	CBM48-GH13_9	CBM50-CBM50	CBM50-CBM50-GH18	CBM48-GH13_10	CBM48-GH13_9		GT2-GT2-GT2-GT4	GT4-GT2	CBM32-CBM62	CBM50-CBM50	CBM50-CBM50-CBM50	CBM9-CBM9	PL1-CE8	CBM50-CBM50-GH18	CBM9-CBM9	CBM50-CBM50	CBM22-CBM22-GH10-CBM9	CBM34-GH13_39-CBM20	GT2-GT2
CBM34-GH13_20	DOC-CBM63	CBM50-GH18		GH2-CBM6	GT4-GT2	CBM50-CBM50-GH18	GH16-CBM6	CBM50-CBM50-GH18	GH9-CBM3-DOC	GT2-GH130	GH5_1-DOC	CBM35-GH26		GH43-CBM6	CBM48-GH13_9	GH43-CBM6	CBM50-CBM50-CBM50-CBM50-CBM50-CBM50	CBM50-CBM50-CBM50-GH18	GT84-GH94	GT2-GT4	CE4-GH18		CBM50-CBM50-CBM50-CBM50	GH39-CBM9	GH43-CBM22-CBM22-GH43-CBM6	CBM42-GH16	CBM48-CE1	CBM50-CBM50-CBM50-GH18	GH73-CBM50-CBM50	CBM48-GH13_9	GH43-GH32	CBM67-GH78			CBM48-GH13_11		CBM67-GH78	GH10-CBM6-CBM22		CBM48-GH13_9	CBM50-CBM50	GT8-GT2	CBM61-GH53	CBM50-GH39	PL11-DOC	CBM35-CBM9	CBM50-CE4
GH2-CBM6	GH48-DOC	COH-DOC		GH16-CBM4	GT2-GT4-GT2	GH5_2-CBM17-CBM28-CBM50	CBM48-GH13_14	GH53-CBM61	GH5_4-DOC-CE2	CBM34-GH13_20	DOC-DOC	GH53-CBM61		CBM50-CBM50	GT2-GT2-GT4	GT8-GT2	CBM50-CBM50-CBM50-CBM50	GH84-CBM32	GH16-CBM4	CBM48-GH13	CBM50-CBM50-GH18		GH15-GH31	GH10-CBM32	GH27-CBM51	CE12-CE12	CBM54-PL9	CBM50-CBM50	CBM54-PL9	CBM22-CBM22-GH10-CBM9-CBM9	CBM67-GH78	CBM48-GH13_11			CBM48-GH13_9			CBM32-CBM32		CBM50-CBM50-GH18	CBM66-PL11	CBM4-CBM4-CBM4-CBM4	CBM50-CBM50-CBM50	CBM48-GH13_10	CBM50-CBM50	CBM9-GH8
CBM50-CBM50-CBM50	GH5_1-DOC	COH-COH-COH-COH		CBM34-GH13_20	GH5_2-CBM17-CBM28	CBM50-CBM50	CBM50-CBM50	CBM50-CBM50	GH48-CBM3	GH9-CBM3	GH43-CBM6-CBM6-DOC	CBM13-GH5_4		CBM50-CBM50-GH18	CBM50-CBM50	GT2-GT2	CBM50-GH18	CBM50-CBM50	CBM50-CBM50-CBM50	CBM50-GH18			CE4-CE4-CE4	GT84-GH94	GH5_35-CBM6	GH43-GH43		CBM34-GH13_39			CBM48-CE1	CBM50-CBM50			GH23-CBM50			GH9-DOC		CBM50-CBM50	GH43-CBM6	GT2-GT4-GT2	GH106-GH2	CBM48-GH13_11	GT84-GH94	GH43-CBM42
GH16-CBM4	GH9-DOC	GT2-GT4		CBM48-GH13_9	CBM4-GH16-CBM4	PL9-GH135	GH2-CBM32		GH48-DOC	GH3-CBM6	GH43-CBM13-DOC	CBM34-GH13_20		GH5_4-DOC-CBM4	PL11-DOC	CBM6-DOC	GH28-CBM32	DOC-CE4	GT4-GT2-GT2	CBM50-CBM50-GH18			GT84-GH94	CBM9-GH30-CBM16	GH43-CBM6	GH105-CBM32-CBM32		CBM9-CE15			CBM32-GH2	GT51-GT51						CBM22-GH43-CBM6		GH10-DOC	GH43-CBM22-CBM22-GH43-CBM6	GH25-DOC	CBM34-GH13_21	CBM50-CBM50-CBM50-CBM50-CBM50	CBM50-CBM50-CBM50-GH18	CBM34-GH13_39
CBM48-GH13_9	CBM34-GH13_20	CBM50-CBM50-GH18		GT2-GT2	GT2-GT2	COH-COH-COH	CBM48-GH13_9		GH16-DOC	CE4-CBM50-CBM50	GH81-DOC	GH5_2-CBM17-CBM28		CBM9-CE1	CBM22-CBM22-GH10-CBM9	CBM50-CBM50	CBM34-GH13_20	CBM50-CBM50-GH18	CE4-GH18				CBM34-GH13_20	CBM50-GH18	GH43-CBM6-CBM6	GH39-CBM35-CBM35-CBM35-CBM62		GH39-CBM35-CBM35-CBM35			CBM26-GH13	CBM48-CE1						CBM32-CBM32-GH81		CBM22-CBM22-GH10-CBM9	CBM22-GH10-CBM32	GT2-GT8	CBM20-GH113	CBM16-CBM50	GH5_2-CBM17-CBM28	CBM50-CBM50-GH39
GH73-CBM50-CBM50	CE3-DOC			GH10-CBM9	CBM48-GH13_10	GH9-CBM3-CBM3	CBM50-GH18		GH11-CBM6-GH10-CBM6-DOC	GH5_1-CBM64	COH-COH-COH-COH-COH-COH-COH	GH43-GH43-CBM6-DOC		GH5_34-CBM6-CBM13-CBM62-DOC	CE4-GH18	GH5_4-DOC-CBM4	CBM50-CBM50	CBM50-CBM50-CBM50-CBM50-CBM50-CBM50	GH29-GH42				CBM50-CBM50-GH18	CBM50-CBM50-CBM50-CBM50	CBM50-CBM50-CBM50-CBM50-CBM50	GH105-CBM32		GH29-CBM32			GH16-GH55-CBM4	GT2-GT4						CBM32-GH95		GT4-GT4	GH95-GH43		GT84-GH94		CE4-GH18	CBM48-GH13
GH5_34-CBM6-CBM13-CBM62	GH10-DOC			CBM41-CBM48-GH13_14	GT4-GT4-GT2	CBM34-GH13	CBM34-GH13_20		GH9-CBM3	GH48-CBM64	CBM22-GH10-CBM22-DOC-CE1	GH3-DOC		CBM13-GH5_4	GH10-DOC		CBM50-CBM50-GH18	GH73-DOC	GH16-CBM9				CBM48-GH13_9	GT4-GT4	CBM50-CBM50	CBM13-GH43-CBM32		GH43-CBM6			CBM32-CBM32-GH81-CBM6-CBM32	GH23-CBM50						CBM6-CBM32-CBM32		CBM34-GH13_20	GH43-CBM6-CBM6		CBM48-GH13_11		GH43-CBM6	GH13_39-CBM20
CBM41-CBM48-GH13_14	DOC-CBM35-PL11			CBM22-CBM22-CBM22-GH10-CBM9		DOC-CBM35-PL11	CBM50-CBM50-GH18		CBM30-GH9-GH44-DOC-CBM44	GH43-CBM6	GH48-DOC	GH10-CBM6-CBM22		COH-CBM3-COH-COH-COH-COH-DOC	GH10-CBM9		CBM3-CBM3	CBM50-GH18	CBM9-CE1				CE4-GH18	PL9-PL9	GH98-CBM35	GH29-CBM6-CBM6		GH10-CBM32			CBM6-GH30_3	GT4-GT4						CBM54-GH16		GT2-GT14	GH5_35-CBM6				GH43-CBM66	CE14-CBM9
CE4-GH18	GH48-GH9-CBM3-CBM3			CBM22-CBM22-CBM22-GH10		COH-CBM2	GT2-GT14		GH5_8-DOC		CE12-DOC-CBM35-CE12	GH43-CBM6-DOC		CBM3-COH-COH-COH-COH-DOC	GH43-CBM22-GH43-CBM6		GH9-CBM3		CBM50-CBM50-CBM50-CBM50				CBM4-CBM4-CBM4	CBM50-CBM50-GH18	CBM9-CE1	CBM32-CBM32-CBM32		GH5_35-CBM6			CE1-CBM50	GT2-GT2						GH43-CBM6-DOC		CE4-GH18	GH27-CBM51				CBM22-GH10-CBM9	GH78-GH100
CBM48-GH13_14	CBM42-GH43-DOC			CBM50-CBM50		CBM22-CBM22-GH10-CBM9-CBM9	GH51-CBM32		CBM3-CBM4		CBM16-CBM16	GH10-CBM32		CBM48-CE1	CBM22-CBM22-GH10		GH73-CBM50-CBM50		CBM50-CBM50-CBM50-CBM50-CBM50					CBM4-CBM4	CBM48-GH13_14	GH29-CBM6		GT2-GT4			GH43-CBM32	CBM9-GH129						GH5_34-CBM6-CBM13		GH5_34-CBM6-CBM13-CBM62	GH10-CBM32				GT2-GT4	CBM50-GH39
GH53-CBM61	GH30-CBM6-DOC			CBM41-CBM48		GT4-GT2-GT2	CBM32-GH2		DOC-GH124		GH9-DOC	CE4-GH18		GT2-GT4	CBM22-CBM22-CBM22				CBM48-GH13_14					CBM4-CBM32	CBM48-GH13_9	GH43-CBM13		CBM67-GH78			GH10-DOC							GH16-CBM4-CBM4-CBM4-CBM4-CBM4		CBM41-CBM48-GH13_14	GH3-CBM6				GH11-CBM6-CBM6
CBM41-CBM48	GH43-CBM13			GT84-GH94		COH-COH-COH-COH	GT2-GT4-GT4		GH43-CBM13		CBM35-GH26-DOC	COH-CBM3-COH-COH-COH-COH-DOC		CE12-DOC-CBM35-CE12	CBM34-GH13_21				GH48-CBM64					CBM16-CBM16-CBM22	GT4-GT2	CBM32-CBM32					CBM41-CBM48-GH13_14							CBM48-GH13_14			CBM9-CE1				GH5_34-CBM6-CBM13-CBM62-DOC
CBM22-CBM22-CBM22-GH10-CBM9	GT84-GH94			GH5_34-CBM6-CBM13-CBM62		GT4-GT4			GH9-CBM3-CBM3-DOC		GH9-CBM3-CBM3-DOC	CBM22-GH10-CBM22		GH10-CBM13	CBM9-CE1				CBM50-GH18					CBM9-GH30	GH9-GH9-DOC	GH39-CBM35-CBM35-CBM35					GH55-GH81							GH10-CBM9			CBM50-CBM50-CBM50-CBM50				CE1-CBM6-DOC
CBM50-CBM50	GH9-CBM3-CBM3-DOC			CBM48-GH13_41-CBM41-CBM41-CBM48-GH13_12		GT4-GT4-GT2			GH30-CBM6-DOC		CBM54-GH16-CBM4-CBM4-CBM4-CBM4	CBM48-GH13_41-CBM41-CBM41-CBM48-GH13_12		GH5_4-CBM4	GT4-GT4									GH39-CBM16	GH43-DOC	CBM50-CBM50					GH55-CBM4-CBM32-CBM32							CBM26-CBM26-GH13			CBM50-GH18				GH43-CBM6-DOC
	GH9-CBM3-DOC			GH43-CBM22-GH43-CBM6		CBM3-DOC			CBM4-GH9		CBM30-GH9-GH44-DOC-CBM44	GH5_34-CBM6-CBM13-CBM62		GH2-CBM6	CBM22-GH10									CBM50-CBM50	GH43-CBM22	CBM35-CBM62					GH9-GH9							CBM25-CBM25			GH43-CBM22-CBM22				CBM3-COH-COH-COH-COH-DOC
	DOC-CBM32			GT4-GT56		GT4-GT2			CBM4-GH9-CBM3		GH48-CBM3	CE12-DOC-CBM35-CE12		GH5_34-CBM6-CBM13	CBM22-CBM22									PL8-CBM32	GH3-DOC	CBM13-GH43					GH3-CBM6							CBM54-CE1			CBM34-GH13_20
	CBM22-GH10-CBM9-CBM9-CBM9-CE1			CBM50-GH18		GT2-GT2			CE3-CE3		GT84-GH94	GH2-CBM6-DOC		CBM6-CBM6	GH11-CBM6-CBM6-CBM6									CBM67-GH78	GH2-DOC	GH39-CBM35					CBM48-GH13_9							GH55-CBM4			CBM22-GH43-CBM6
	GH11-CBM6-DOC-CE6					GT4-GT56			GH5_25-CBM11		GH18-DOC	CBM6-DOC		GT2-GT2-GT4	GH30-CBM22-CBM22									CBM16-CBM22-CBM16-CBM22	GH10-DOC	CBM35-CBM35-CBM62					GH16-CBM32										CBM48-GH13_41-CBM41-CBM41-CBM48-GH13_12
	CBM2-CBM2					GT2-GT4-GT4			CE12-DOC-CBM35-CE12		GH8-DOC	CE1-CBM6-DOC		CBM50-GH18	GH43-CBM66									GT2-GT4	GH9-DOC																GH2-CBM6
	CBM35-CE12					GT2-GT4			GH74-DOC		GH26-GH5_25-CBM11-DOC	GH5_34-CBM6-CBM13-CBM62-DOC			CBM16-CBM16-CBM22									GT4-GT4-GT2	GH9-GH9																CBM6-CBM6
	GH11-CBM6-CBM36					GH9-CBM3			GH11-CBM6-DOC-CE4		CBM50-CBM50	GH39-CBM9			GH39-CBM9									CBM16-CBM22-CBM16	CBM3-GH43-CBM6
	CBM35-GH26-DOC								CBM50-CBM50-CBM50-CBM50		GH30_8-CBM6-DOC	GH16-CBM9			CBM54-PL9									COH-COH-CBM2-CBM2	GH5_8-CBM64
	GH11-GH10								CBM50-CBM50		CBM50-CBM50-CBM50-CBM50	GH9-DOC			CBM35-GH26									CBM50-CBM50-CBM50	GT4-GT4
	COH-COH-COH-COH-COH-COH-COH								GH2-CBM6		CBM50-CBM50-CBM50	CBM4-GH9			CBM50-GH18									GH5_41-CBM22	CBM3-COH-COH-COH-COH-DOC
	GH30-DOC								GH43-CBM6		CE1-CBM6-DOC-GH10				GH5_2-CBM17-CBM28									CBM66-GH110	COH-COH
	CBM16-GT39								CBM35-GH26-DOC		GH5-CBM32-DOC				CBM22-CBM22-CBM22-GH10-CBM9									GH16-CBM6	CBM50-CBM50-CBM50
	GH11-CBM6-GH11-DOC-CBM6-CE4								GH9-CBM3-CBM3		CBM4-GH9				GH43-CBM6									CBM38-CBM38-CBM38-CBM38	GH43-CBM32
	GH26-DOC								DOC-CBM63		DOC-CBM35-PL11				GH3-CBM6									GH5_41-CBM4	GH43-CBM32-DOC
	CE4-GT2								PL1-DOC-CBM35		CE3-DOC				CBM41-GH13_41-CBM41										GH67-DOC
	GT2-GT4								CE8-DOC		GH5_4-DOC-CE2				GH43-CBM22										GH43-GH43-CBM6-DOC
	GH18-DOC								GT84-GH94		CBM34-GH13_20				GH53-CBM61										CBM32-GH20-DOC
	CBM22-CBM22-CBM22-GH10-CBM9-CBM9-DOC								GH10-CBM22-DOC-CE1		GH74-DOC				CBM34-GH13_20										CBM40-GH33-DOC
	GT4-GT4								DOC-CBM35-PL11		GH53-DOC				CBM2-CBM2										GH20-GH123-CBM32-CBM40-GH33-DOC
	DOC-DOC-DOC								COH-COH		CBM3-GH5_1-DOC				GH2-CBM6										CBM35-CBM35
	CBM22-CBM22-GH10-CBM9								GH9-DOC		COH-COH				GH26-CBM3										GH43-CBM6-DOC
	GH74-DOC								GH5-CBM32-DOC		CBM42-DOC-GH43				CBM41-GH13_41										CBM22-GH43-CBM6
	DOC-CE3								GH8-DOC		GH16-DOC				CBM32-GH55										CBM22-GH10
	CBM9-CBM9-CE1-CBM9-GH10								CBM50-CBM50-GH18		CE8-DOC				PL1-DOC-CBM35-PL9										CBM6-CBM6
	GH43-CBM6-DOC								CBM54-GH16-CBM4-CBM4-CBM4-CBM4		PL1-DOC-CBM35				CBM22-GH10-CBM9										CBM32-CBM32
	GH11-CBM6-DOC-GH10								GH5_1-DOC		COH-COH-CBM3														GH76-CBM35-CBM35
	CBM48-GH13_8								GH53-DOC		GH2-CBM6-DOC														CBM50-CBM50-CBM50-CBM50
	CE1-CBM6-DOC								GH26-GH5_25		GH43-CBM6-DOC														GH43-CBM22-CBM22-GH43
	GH44-DOC-CBM44								DOC-GH43		CBM6-DOC														CBM32-GH20
	GH81-DOC								CE4-GT2		CE1-CBM6-DOC														GH10-CBM9
	GH8-DOC								GT2-GT4		GH5_34-CBM6-CBM13-CBM62-DOC														CBM35-CBM61-CBM61
	GH16-DOC								COH-COH-COH-COH-COH-COH		CBM6-DOC-CE4														GH48-CBM64
	GH11-DOC								CBM48-GH13_9		CBM50-CBM50-GH18
	COH-COH-COH-DOC								CBM34-GH13_20		GH9-CBM3-CBM3
	CBM50-CBM50								GH5_4-DOC-CBM4		CBM3-CBM4
	GH5_4-DOC-CE2								GH30_5-CBM42-GH43-DOC		CBM48-GH13_9
	DOC-CBM35-CE8								GT2-GT4-GT2-GT2		GH11-CBM6-DOC-CE4
	DOC-PL9								PL1-DOC-CBM35-PL9		CE1-CBM6
	COH-COH-COH								GH43-CBM6-DOC		CBM3-DOC
	CBM4-GH9-DOC								CE1-CBM6-DOC		PL1-DOC-CBM35-PL9
	DOC-GH43								CBM62-DOC		CBM41-CBM48-GH13_14
	COH-CBM2								GH26-GH5_25-CBM11		GT4-GT4
	COH-DOC								DOC-DOC
	COH-COH-COH-COH								CBM22-GH10-CBM22-DOC-CE1
	CE1-DOC								CBM6-DOC
	COH-COH								COH-DOC
	DOC-CBM6-CE4								GT4-GT4
	CBM50-CBM50-GH18								GT2-GT4-GT4
	GT2-GT4-GT4								CBM22-CBM22-GH10-CBM9-CBM9
	CBM6-CBM6-CBM6								CE3-DOC
	CBM6-CBM3-CBM6								GT2-GT14
	GH5_2-CBM17-CBM28								GT4-GT4-GT2
	CBM4-GH16-CBM4								CBM9-CE1
	COH-COH-COH-COH-COH								CBM3-COH-COH-COH-COH-DOC
	CBM35-PL11								GT2-GT2
	GH9-CBM3-CBM3								GH2-CBM6-DOC
	CBM6-CBM6
	CBM3-CBM3
	GH48-GH9
	CBM9-CBM9-CE1
	CBM9-CE1
	CBM22-GH10-CBM9-CBM9-CBM9
	CBM42-GH43
	CBM3-DOC
	COH-COH-COH-CBM2-CBM2
	CBM4-GH9
	GH43-DOC
	COH-COH-DOC
	CBM35-GH26
	GH9-CBM3
	CBM22-CBM22
	GT2-GT4-GT2-GT2
	GT2-GT2
	CBM3-CBM3-DOC
	COH-COH-CBM2
	GH43-CBM42
	GH43-CBM6
	CBM6-DOC
	GT4-GT2
	GT2-GT2-GT4
	CE12-DOC-CBM35-CE12
	COH-COH-COH-CBM2
